# Supplementary material for: Nuclear factor erythroid 2 – related factor 2 and its relationship with cellular response in nickel exposure: a systems biology analysis
Source: BMC Pharmacol Toxicol. 2019 Dec 19;20(Suppl 1):78. doi: 10.1186/s40360-019-0360-4 (PMC6921378; doi:10.1186/s40360-019-0360-4)
Supplement: Supplementary file 1 — Additional file . clusters ontology analysis. [file 40360_2019_360_MOESM1_ESM.xlsx]

## Sheet: Supplementary table (S1)
Selected ontology file : bundle://134.0:1/data/GO_Biological_Process
Selected annotation file : bundle://134.0:1/data/H_sapiens_default
Discarded evidence codes :
Overrepresentation
Selected statistical test : Hypergeometric test
Selected correction : Benjamini & Hochberg False Discovery Rate (FDR) correction
Selected significance level : 0.05
Testing option : Use whole annotation as reference set
The selected cluster :
ATF1	SPI1	EPO	KEAP1	AHR	ELK1	ETS1	TNF	ETS2	ELK3	ELK4	YY1	CREB3L3	TRIM28	CREB3L4	CREB3L1	MYC	CREB3L2	MYB	AKT1	SKP2	SMARCC1	SMARCC2	FBXW7	PRKCD	EBF1	RBX1	DDIT3	ERF	SQSTM1	ATF3	ATF4	CUL3	CREM	CUL1	BAZ2A	UBC	MAP2K6	EGR1	NFE2	STAT5B	CREBBP	JUN	JUND	TGFB1	YES1	PLK1	NFATC3	NFATC2	NFATC1
No annotations were retrieved for the following entities:
NISO4	UBC
GO-ID	p-value	corr p-value	x	n	Description	Genes in test set
6355	1.2708e-40	2.8313e-37	78	1803	regulation of transcription, DNA-dependent	ATF1|SPI1|EPO|AHR|BRCA1|RBPJ|BACH1|ELK1|ETS1|TNF|MYSM1|ETS2|ELK3|ELK4|YY1|CREB3L3|TRIM28|CREB3L4|CREB3L1|MYC|CREB3L2|MYB|SREBF1|SMARCC1|SMARCC2|TBP|EBF1|FOS|ETV4|SIRT1|ETV6|ETV7|NCOR2|CREB3|KAT2B|KAT2A|CREB1|NCOR1|ELF3|IFNG|DDIT3|IRF1|IRF2|ERF|SQSTM1|ATF3|ATF4|CREB5|CEBPB|HDAC2|HDAC3|CEBPD|HDAC1|CREM|BAZ2A|RELA|RELB|EGR1|NFE2|STAT5B|CREBBP|JUN|JUND|TGFB1|STAT1|STAT3|NFATC3|NFATC2|NFATC1|NFATC4|SM…
51252	9.438e-40	1.0514e-36	78	1852	regulation of RNA metabolic process	ATF1|SPI1|EPO|AHR|BRCA1|RBPJ|BACH1|ELK1|ETS1|TNF|MYSM1|ETS2|ELK3|ELK4|YY1|CREB3L3|TRIM28|CREB3L4|CREB3L1|MYC|CREB3L2|MYB|SREBF1|SMARCC1|SMARCC2|TBP|EBF1|FOS|ETV4|SIRT1|ETV6|ETV7|NCOR2|CREB3|KAT2B|KAT2A|CREB1|NCOR1|ELF3|IFNG|DDIT3|IRF1|IRF2|ERF|SQSTM1|ATF3|ATF4|CREB5|CEBPB|HDAC2|HDAC3|CEBPD|HDAC1|CREM|BAZ2A|RELA|RELB|EGR1|NFE2|STAT5B|CREBBP|JUN|JUND|TGFB1|STAT1|STAT3|NFATC3|NFATC2|NFATC1|NFATC4|SM…
10628	1.0496e-37	5.8871e-35	52	603	positive regulation of gene expression	ATF1|SPI1|EPO|AHR|BRCA1|RBPJ|ELK1|ETS1|TNF|MYSM1|ETS2|TRIM28|CREB3L4|MYC|CREB3L2|SREBF1|SMARCC1|SMARCC2|TBP|EBF1|FOS|CREB3|CREB1|IFNG|DDIT3|IRF1|SQSTM1|ATF4|CREB5|CEBPB|HDAC2|HDAC1|RELA|RELB|MAPK1|EGR1|NFE2|STAT5B|CREBBP|JUN|TGFB1|STAT3|NFATC3|NFATC2|SMARCA4|VEGFA|FOSL1|NFKBIA|SP1|CDK1|REL|NFE2L2
51173	1.0569e-37	5.8871e-35	54	677	positive regulation of nitrogen compound metabolic process	ATF1|SPI1|EPO|AHR|BRCA1|RBPJ|ELK1|ETS1|TNF|MYSM1|ETS2|TRIM28|CREB3L4|MYC|CREB3L2|AKT1|SREBF1|SMARCC1|SMARCC2|TBP|EBF1|FOS|CREB3|CREB1|IFNG|DDIT3|IRF1|SQSTM1|ATF4|CREB5|CEBPB|HDAC2|HDAC1|PTGS2|EGFR|RELA|MAPK1|EGR1|NFE2|STAT5B|CREBBP|JUN|TGFB1|STAT3|NFATC3|NFATC2|SMARCA4|VEGFA|FOSL1|NFKBIA|SP1|CDK1|REL|NFE2L2
9891	3.305e-37	1.4727e-34	55	731	positive regulation of biosynthetic process	ATF1|SPI1|EPO|AHR|BRCA1|RBPJ|ELK1|ETS1|TNF|MYSM1|ETS2|TRIM28|CREB3L4|MYC|CREB3L2|AKT1|SREBF1|SMARCC1|SMARCC2|TBP|EBF1|FOS|CREB3|CREB1|IFNG|DDIT3|IRF1|SQSTM1|ATF4|CREB5|CEBPB|HDAC2|HDAC1|PTGS2|EGFR|RELA|MAPK1|EGR1|NFE2|STAT5B|CREBBP|JUN|TGFB1|STAT3|NFATC3|NFATC2|SMARCA4|VEGFA|FOSL1|NFKBIA|SP1|CDK1|REL|NOX1|NFE2L2
10557	1.8045e-36	6.7008e-34	53	675	positive regulation of macromolecule biosynthetic process	ATF1|SPI1|EPO|AHR|BRCA1|RBPJ|ELK1|ETS1|TNF|MYSM1|ETS2|TRIM28|CREB3L4|MYC|CREB3L2|AKT1|SREBF1|SMARCC1|SMARCC2|TBP|EBF1|FOS|CREB3|CREB1|IFNG|DDIT3|IRF1|SQSTM1|ATF4|CREB5|CEBPB|HDAC2|HDAC1|RELA|MAPK1|EGR1|NFE2|STAT5B|CREBBP|JUN|TGFB1|STAT3|NFATC3|NFATC2|SMARCA4|VEGFA|FOSL1|NFKBIA|SP1|CDK1|REL|NOX1|NFE2L2
31328	2.8041e-36	8.9249e-34	54	720	positive regulation of cellular biosynthetic process	ATF1|SPI1|EPO|AHR|BRCA1|RBPJ|ELK1|ETS1|TNF|MYSM1|ETS2|TRIM28|CREB3L4|MYC|CREB3L2|AKT1|SREBF1|SMARCC1|SMARCC2|TBP|EBF1|FOS|CREB3|CREB1|IFNG|DDIT3|IRF1|SQSTM1|ATF4|CREB5|CEBPB|HDAC2|HDAC1|PTGS2|EGFR|RELA|MAPK1|EGR1|NFE2|STAT5B|CREBBP|JUN|TGFB1|STAT3|NFATC3|NFATC2|SMARCA4|VEGFA|FOSL1|NFKBIA|SP1|CDK1|REL|NFE2L2
45941	4.255e-36	1.185e-33	50	575	positive regulation of transcription	ATF1|SPI1|EPO|AHR|BRCA1|RBPJ|ELK1|ETS1|TNF|MYSM1|ETS2|TRIM28|CREB3L4|MYC|CREB3L2|SREBF1|SMARCC1|SMARCC2|TBP|EBF1|FOS|CREB3|CREB1|IFNG|DDIT3|IRF1|SQSTM1|ATF4|CREB5|CEBPB|HDAC2|HDAC1|RELA|MAPK1|EGR1|NFE2|STAT5B|CREBBP|JUN|TGFB1|STAT3|NFATC3|NFATC2|SMARCA4|VEGFA|FOSL1|NFKBIA|SP1|REL|NFE2L2
51171	1.5395e-34	3.4402e-32	88	3036	regulation of nitrogen compound metabolic process	ATF1|SPI1|EPO|AHR|BRCA1|RBPJ|BACH1|ELK1|ETS1|TNF|MYSM1|ETS2|ELK3|ELK4|YY1|CREB3L3|TRIM28|CREB3L4|CREB3L1|MYC|CREB3L2|MYB|AKT1|MYBL2|SREBF1|SMARCC1|SMARCC2|TBP|FBXW7|EBF1|FOS|ETV4|SIRT1|ETV6|ETV7|NCOR2|CREB3|KAT2B|KAT2A|CREB1|NCOR1|ELF3|IFNG|DDIT3|IRF1|IRF2|ERF|SQSTM1|ATF3|ATF4|CREB5|CEBPB|HDAC2|HDAC3|CEBPD|HDAC1|CREM|BAZ2A|PTGS2|EGFR|RELA|RELB|MAPK1|MAPK3|EGR1|NFE2|STAT5B|CREBBP|JUN|JUND|TGFB1|ST…
45935	1.5441e-34	3.4402e-32	51	656	positive regulation of nucleobase, nucleoside, nucleotide and nucleic acid metabolic process	ATF1|SPI1|EPO|AHR|BRCA1|RBPJ|ELK1|ETS1|TNF|MYSM1|ETS2|TRIM28|CREB3L4|MYC|CREB3L2|SREBF1|SMARCC1|SMARCC2|TBP|EBF1|FOS|CREB3|CREB1|IFNG|DDIT3|IRF1|SQSTM1|ATF4|CREB5|CEBPB|HDAC2|HDAC1|RELA|MAPK1|EGR1|NFE2|STAT5B|CREBBP|JUN|TGFB1|STAT3|NFATC3|NFATC2|SMARCA4|VEGFA|FOSL1|NFKBIA|SP1|CDK1|REL|NFE2L2
9889	1.7171e-34	3.4778e-32	88	3040	regulation of biosynthetic process	ATF1|SPI1|EPO|AHR|BRCA1|RBPJ|BACH1|ELK1|ETS1|TNF|MYSM1|ETS2|ELK3|ELK4|YY1|CREB3L3|TRIM28|CREB3L4|CREB3L1|MYC|CREB3L2|MYB|AKT1|MYBL2|SREBF1|SMARCC1|SMARCC2|TBP|FBXW7|EBF1|FOS|ETV4|SIRT1|ETV6|ETV7|NCOR2|CREB3|KAT2B|KAT2A|CREB1|NCOR1|ELF3|IFNG|DDIT3|IRF1|IRF2|ERF|SQSTM1|ATF3|ATF4|CREB5|CEBPB|HDAC2|HDAC3|CEBPD|HDAC1|CREM|BAZ2A|PTGS2|EGFR|RELA|RELB|MAPK1|MAPK3|EGR1|NFE2|STAT5B|CREBBP|JUN|JUND|TGFB1|ST…
10556	3.021e-34	5.609e-32	86	2872	regulation of macromolecule biosynthetic process	ATF1|SPI1|EPO|AHR|BRCA1|RBPJ|BACH1|ELK1|ETS1|TNF|MYSM1|ETS2|ELK3|ELK4|YY1|CREB3L3|TRIM28|CREB3L4|CREB3L1|MYC|CREB3L2|MYB|AKT1|MYBL2|SREBF1|SMARCC1|SMARCC2|TBP|FBXW7|EBF1|FOS|ETV4|SIRT1|ETV6|ETV7|NCOR2|CREB3|KAT2B|KAT2A|CREB1|NCOR1|ELF3|IFNG|DDIT3|IRF1|IRF2|ERF|SQSTM1|ATF3|ATF4|CREB5|CEBPB|HDAC2|HDAC3|CEBPD|HDAC1|CREM|BAZ2A|RELA|RELB|MAPK1|MAPK3|EGR1|NFE2|STAT5B|CREBBP|JUN|JUND|TGFB1|STAT1|STAT3|N…
9893	3.5495e-34	6.0833e-32	59	1018	positive regulation of metabolic process	ATF1|SPI1|EPO|AHR|BRCA1|RBPJ|ELK1|ETS1|TNF|MYSM1|ETS2|TRIM28|CREB3L4|MYC|CREB3L2|AKT1|SREBF1|SMARCC1|SMARCC2|TBP|EBF1|FOS|CREB3|CREB1|IFNG|DDIT3|IRF1|SQSTM1|ATF4|CREB5|CEBPB|HDAC2|HDAC1|CUL1|PTGS2|EGFR|RELA|RELB|MAPK1|EGR1|NFE2|STAT5B|CREBBP|JUN|TGFB1|PLK1|STAT3|NFATC3|NFATC2|SMARCA4|VEGFA|FOSL1|NFKBIA|APC|SP1|CDK1|REL|NOX1|NFE2L2
60255	3.8404e-34	6.1118e-32	91	3371	regulation of macromolecule metabolic process	ATF1|SPI1|EPO|AHR|BRCA1|RBPJ|BACH1|ELK1|ETS1|TNF|MYSM1|ETS2|ELK3|ELK4|YY1|CREB3L3|TRIM28|CREB3L4|CREB3L1|MYC|CREB3L2|MYB|AKT1|MYBL2|SREBF1|SMARCC1|SMARCC2|TBP|FBXW7|PRKCD|EBF1|FOS|ETV4|SIRT1|ETV6|ETV7|NCOR2|CREB3|KAT2B|KAT2A|CREB1|NCOR1|ELF3|IFNG|DDIT3|IRF1|IRF2|ERF|SQSTM1|ATF3|ATF4|CREB5|CEBPB|HDAC2|HDAC3|CEBPD|HDAC1|CREM|CUL1|BAZ2A|EGFR|RELA|RELB|MAPK1|MAPK3|EGR1|NFE2|STAT5B|CREBBP|JUN|JUND|TGF…
10604	1.0529e-33	1.564e-31	57	941	positive regulation of macromolecule metabolic process	ATF1|SPI1|EPO|AHR|BRCA1|RBPJ|ELK1|ETS1|TNF|MYSM1|ETS2|TRIM28|CREB3L4|MYC|CREB3L2|AKT1|SREBF1|SMARCC1|SMARCC2|TBP|EBF1|FOS|CREB3|CREB1|IFNG|DDIT3|IRF1|SQSTM1|ATF4|CREB5|CEBPB|HDAC2|HDAC1|CUL1|RELA|RELB|MAPK1|EGR1|NFE2|STAT5B|CREBBP|JUN|TGFB1|PLK1|STAT3|NFATC3|NFATC2|SMARCA4|VEGFA|FOSL1|NFKBIA|APC|SP1|CDK1|REL|NOX1|NFE2L2
31326	1.2086e-33	1.683e-31	87	3016	regulation of cellular biosynthetic process	ATF1|SPI1|EPO|AHR|BRCA1|RBPJ|BACH1|ELK1|ETS1|TNF|MYSM1|ETS2|ELK3|ELK4|YY1|CREB3L3|TRIM28|CREB3L4|CREB3L1|MYC|CREB3L2|MYB|AKT1|MYBL2|SREBF1|SMARCC1|SMARCC2|TBP|FBXW7|EBF1|FOS|ETV4|SIRT1|ETV6|ETV7|NCOR2|CREB3|KAT2B|KAT2A|CREB1|NCOR1|ELF3|IFNG|DDIT3|IRF1|IRF2|ERF|SQSTM1|ATF3|ATF4|CREB5|CEBPB|HDAC2|HDAC3|CEBPD|HDAC1|CREM|BAZ2A|PTGS2|EGFR|RELA|RELB|MAPK1|MAPK3|EGR1|NFE2|STAT5B|CREBBP|JUN|JUND|TGFB1|ST…
45449	5.7171e-33	7.4927e-31	82	2618	regulation of transcription	ATF1|SPI1|EPO|AHR|BRCA1|RBPJ|BACH1|ELK1|ETS1|TNF|MYSM1|ETS2|ELK3|ELK4|YY1|CREB3L3|TRIM28|CREB3L4|CREB3L1|MYC|CREB3L2|MYB|MYBL2|SREBF1|SMARCC1|SMARCC2|TBP|EBF1|FOS|ETV4|SIRT1|ETV6|ETV7|NCOR2|CREB3|KAT2B|KAT2A|CREB1|NCOR1|ELF3|IFNG|DDIT3|IRF1|IRF2|ERF|SQSTM1|ATF3|ATF4|CREB5|CEBPB|HDAC2|HDAC3|CEBPD|HDAC1|CREM|BAZ2A|RELA|RELB|MAPK1|MAPK3|EGR1|NFE2|STAT5B|CREBBP|JUN|JUND|TGFB1|STAT1|STAT3|NFATC3|NFATC…
10468	1.601e-32	1.9817e-30	85	2923	regulation of gene expression	ATF1|SPI1|EPO|AHR|BRCA1|RBPJ|BACH1|ELK1|ETS1|TNF|MYSM1|ETS2|ELK3|ELK4|YY1|CREB3L3|TRIM28|CREB3L4|CREB3L1|MYC|CREB3L2|MYB|AKT1|MYBL2|SREBF1|SMARCC1|SMARCC2|TBP|PRKCD|EBF1|FOS|ETV4|SIRT1|ETV6|ETV7|NCOR2|CREB3|KAT2B|KAT2A|CREB1|NCOR1|ELF3|IFNG|DDIT3|IRF1|IRF2|ERF|SQSTM1|ATF3|ATF4|CREB5|CEBPB|HDAC2|HDAC3|CEBPD|HDAC1|CREM|BAZ2A|RELA|RELB|MAPK1|MAPK3|EGR1|NFE2|STAT5B|CREBBP|JUN|JUND|TGFB1|STAT1|STAT3|N…
80090	3.0675e-32	3.5971e-30	91	3548	regulation of primary metabolic process	ATF1|SPI1|EPO|AHR|BRCA1|RBPJ|BACH1|ELK1|ETS1|TNF|MYSM1|ETS2|ELK3|ELK4|YY1|CREB3L3|TRIM28|CREB3L4|CREB3L1|MYC|CREB3L2|MYB|AKT1|MYBL2|SREBF1|SMARCC1|SMARCC2|TBP|FBXW7|PRKCD|EBF1|FOS|ETV4|SIRT1|ETV6|ETV7|NCOR2|CREB3|KAT2B|KAT2A|CREB1|NCOR1|ELF3|IFNG|DDIT3|IRF1|IRF2|ERF|SQSTM1|ATF3|ATF4|CREB5|CEBPB|HDAC2|HDAC3|CEBPD|HDAC1|CREM|CUL1|BAZ2A|PTGS2|EGFR|RELA|RELB|MAPK1|MAPK3|EGR1|NFE2|STAT5B|CREBBP|JUN|JU…
31325	6.6096e-32	7.3631e-30	56	966	positive regulation of cellular metabolic process	ATF1|SPI1|EPO|AHR|BRCA1|RBPJ|ELK1|ETS1|TNF|MYSM1|ETS2|TRIM28|CREB3L4|MYC|CREB3L2|AKT1|SREBF1|SMARCC1|SMARCC2|TBP|EBF1|FOS|CREB3|CREB1|IFNG|DDIT3|IRF1|SQSTM1|ATF4|CREB5|CEBPB|HDAC2|HDAC1|CUL1|PTGS2|EGFR|RELA|MAPK1|EGR1|NFE2|STAT5B|CREBBP|JUN|TGFB1|PLK1|STAT3|NFATC3|NFATC2|SMARCA4|VEGFA|FOSL1|NFKBIA|SP1|CDK1|REL|NFE2L2
31323	1.6957e-31	1.7991e-29	92	3730	regulation of cellular metabolic process	ATF1|SPI1|EPO|AHR|BRCA1|RBPJ|BACH1|ELK1|ETS1|TNF|MYSM1|ETS2|ELK3|ELK4|YY1|CREB3L3|TRIM28|CREB3L4|CREB3L1|MYC|CREB3L2|MYB|AKT1|MYBL2|SREBF1|SMARCC1|SMARCC2|TBP|FBXW7|PRKCD|EBF1|FOS|ETV4|SIRT1|ETV6|ETV7|NCOR2|CREB3|KAT2B|KAT2A|CREB1|NCOR1|ELF3|IFNG|DDIT3|IRF1|IRF2|ERF|SQSTM1|ATF3|ATF4|CREB5|CEBPB|HDAC2|HDAC3|CEBPD|HDAC1|CREM|CUL1|BAZ2A|PTGS2|EGFR|RELA|RELB|MAPK1|MAP2K6|MAPK3|EGR1|NFE2|STAT5B|CREBBP…
19222	8.1971e-31	8.3015e-29	93	3913	regulation of metabolic process	ATF1|SPI1|EPO|AHR|BRCA1|RBPJ|BACH1|ELK1|ETS1|TNF|MYSM1|ETS2|ELK3|ELK4|YY1|CREB3L3|TRIM28|CREB3L4|CREB3L1|MYC|CREB3L2|MYB|AKT1|MYBL2|SREBF1|SMARCC1|SMARCC2|TBP|FBXW7|PRKCD|EBF1|FOS|ETV4|SIRT1|ETV6|ETV7|NCOR2|CREB3|KAT2B|KAT2A|CREB1|NCOR1|ELF3|IFNG|DDIT3|IRF1|IRF2|ERF|SQSTM1|ATF3|ATF4|CREB5|CEBPB|HDAC2|HDAC3|CEBPD|HDAC1|CREM|CUL1|BAZ2A|PTGS2|EGFR|RELA|RELB|MAPK1|MAP2K6|MAPK3|EGR1|NFE2|STAT5B|CREBBP…
19219	1.9204e-30	1.8602e-28	84	3010	regulation of nucleobase, nucleoside, nucleotide and nucleic acid metabolic process	ATF1|SPI1|EPO|AHR|BRCA1|RBPJ|BACH1|ELK1|ETS1|TNF|MYSM1|ETS2|ELK3|ELK4|YY1|CREB3L3|TRIM28|CREB3L4|CREB3L1|MYC|CREB3L2|MYB|MYBL2|SREBF1|SMARCC1|SMARCC2|TBP|FBXW7|EBF1|FOS|ETV4|SIRT1|ETV6|ETV7|NCOR2|CREB3|KAT2B|KAT2A|CREB1|NCOR1|ELF3|IFNG|DDIT3|IRF1|IRF2|ERF|SQSTM1|ATF3|ATF4|CREB5|CEBPB|HDAC2|HDAC3|CEBPD|HDAC1|CREM|BAZ2A|RELA|RELB|MAPK1|MAPK3|EGR1|NFE2|STAT5B|CREBBP|JUN|JUND|TGFB1|STAT1|STAT3|NFATC3…
6357	2.4535e-29	2.2777e-27	49	747	regulation of transcription from RNA polymerase II promoter	ATF1|SPI1|EPO|AHR|BRCA1|BACH1|ELK1|ETS1|TNF|YY1|TRIM28|CREB3L4|MYC|SREBF1|SMARCC1|SMARCC2|FOS|SIRT1|NCOR2|CREB3|KAT2A|CREB1|NCOR1|IRF1|IRF2|ERF|SQSTM1|ATF4|CEBPB|HDAC2|HDAC3|HDAC1|RELA|EGR1|NFE2|STAT5B|CREBBP|JUN|JUND|TGFB1|STAT3|NFATC3|NFATC2|SMARCA4|VEGFA|FOSL1|NFKBIA|SP1|FOSB
48518	8.5358e-29	7.6071e-27	73	2206	positive regulation of biological process	ATF1|SPI1|EPO|AHR|BRCA1|RBPJ|ELK1|ETS1|TNF|MYSM1|ETS2|TRIM28|CREB3L4|MYC|CREB3L2|AKT1|CD36|SREBF1|SMARCC1|SMARCC2|TBP|EBF1|FOS|SIRT1|CREB3|CREB1|IFNG|DDIT3|IRF1|SQSTM1|ATF3|ATF4|CREB5|CEBPB|HDAC2|HDAC1|SRC|CUL3|CUL1|PTGS2|EGFR|RELA|RELB|MAPK8|CCL5|CCL2|MAPK1|FYN|MAP2K6|EGR1|NFE2|STAT5B|CREBBP|JUN|JUND|TGFB1|STAT1|PLK1|STAT3|NFATC3|NFATC2|SMARCA4|VEGFA|FOSL1|NFKBIA|IL8|APC|SP1|CDK1|REL|ATM|NOX1|NF…
45893	1.5586e-28	1.3356e-26	42	500	positive regulation of transcription, DNA-dependent	ATF1|CEBPB|HDAC2|SPI1|EPO|HDAC1|AHR|BRCA1|ELK1|ETS1|TNF|MYSM1|ETS2|RELA|TRIM28|CREB3L4|EGR1|STAT5B|SREBF1|SMARCC1|CREBBP|JUN|SMARCC2|TGFB1|STAT3|NFATC3|NFATC2|FOS|SMARCA4|VEGFA|FOSL1|NFKBIA|CREB3|CREB1|IFNG|SP1|IRF1|REL|SQSTM1|ATF4|NFE2L2|CREB5
51254	2.5514e-28	2.1054e-26	42	506	positive regulation of RNA metabolic process	ATF1|CEBPB|HDAC2|SPI1|EPO|HDAC1|AHR|BRCA1|ELK1|ETS1|TNF|MYSM1|ETS2|RELA|TRIM28|CREB3L4|EGR1|STAT5B|SREBF1|SMARCC1|CREBBP|JUN|SMARCC2|TGFB1|STAT3|NFATC3|NFATC2|FOS|SMARCA4|VEGFA|FOSL1|NFKBIA|CREB3|CREB1|IFNG|SP1|IRF1|REL|SQSTM1|ATF4|NFE2L2|CREB5
48522	1.7436e-27	1.3874e-25	69	2002	positive regulation of cellular process	ATF1|SPI1|EPO|AHR|BRCA1|RBPJ|ELK1|ETS1|TNF|MYSM1|ETS2|TRIM28|CREB3L4|MYC|CREB3L2|AKT1|CD36|SREBF1|SMARCC1|SMARCC2|TBP|EBF1|FOS|SIRT1|CREB3|CREB1|IFNG|DDIT3|IRF1|SQSTM1|ATF3|ATF4|CREB5|CEBPB|HDAC2|HDAC1|CUL3|CUL1|PTGS2|EGFR|RELA|MAPK8|CCL5|CCL2|MAPK1|MAP2K6|EGR1|NFE2|STAT5B|CREBBP|JUN|JUND|TGFB1|STAT1|PLK1|STAT3|NFATC3|NFATC2|SMARCA4|VEGFA|FOSL1|NFKBIA|APC|SP1|CDK1|REL|ATM|NOX1|NFE2L2
50794	4.7012e-26	3.6118e-24	105	6216	regulation of cellular process	ATF1|SPI1|EPO|KEAP1|AHR|RBPJ|BACH1|ELK1|ETS1|TNF|ETS2|ELK3|ELK4|YY1|CREB3L3|TRIM28|CREB3L4|CREB3L1|MYC|CREB3L2|MYB|AKT1|SMARCC1|SMARCC2|FBXW7|PRKCD|EBF1|DDIT3|ERF|SQSTM1|ATF3|ATF4|CUL3|CREM|CUL1|BAZ2A|MAP2K6|EGR1|NFE2|STAT5B|CREBBP|JUN|JUND|TGFB1|PLK1|NFATC3|NFATC2|NFATC1|NFATC4|SMARCA4|FOSL1|NFKBIA|TADA2A|IL8|SP1|CDK1|REL|ATM|GRB2|NOX1|NFE2L2|BRCA1|MYSM1|MYBL2|CD36|SREBF1|TBP|FOS|ETV4|SIRT1|ETV6…
50789	4.591e-25	3.4096e-23	106	6546	regulation of biological process	ATF1|SPI1|EPO|KEAP1|AHR|RBPJ|BACH1|ELK1|ETS1|TNF|ETS2|ELK3|ELK4|YY1|CREB3L3|TRIM28|CREB3L4|CREB3L1|MYC|CREB3L2|MYB|AKT1|SMARCC1|SMARCC2|FBXW7|PRKCD|EBF1|DDIT3|ERF|SQSTM1|ATF3|ATF4|CUL3|CREM|CUL1|BAZ2A|MAP2K6|EGR1|NFE2|STAT5B|CREBBP|JUN|JUND|TGFB1|PLK1|NFATC3|NFATC2|NFATC1|NFATC4|SMARCA4|FOSL1|NFKBIA|TADA2A|IL8|SP1|CDK1|REL|ATM|GRB2|NOX1|NFE2L2|BRCA1|MYSM1|MYBL2|CD36|SREBF1|TBP|FOS|ETV4|SIRT1|ETV6…
65007	8.3347e-24	5.9903e-22	107	6935	biological regulation	ATF1|SPI1|EPO|KEAP1|AHR|RBPJ|BACH1|ELK1|ETS1|TNF|ETS2|ELK3|ELK4|YY1|CREB3L3|TRIM28|CREB3L4|CREB3L1|MYC|CREB3L2|MYB|AKT1|SMARCC1|SMARCC2|FBXW7|PRKCD|EBF1|DDIT3|ERF|SQSTM1|ATF3|ATF4|CUL3|CREM|CUL1|BAZ2A|MAP2K6|EGR1|NFE2|STAT5B|CREBBP|JUN|JUND|TGFB1|YES1|PLK1|NFATC3|NFATC2|NFATC1|NFATC4|SMARCA4|FOSL1|NFKBIA|TADA2A|IL8|SP1|CDK1|REL|ATM|GRB2|NOX1|NFE2L2|BRCA1|MYSM1|MYBL2|CD36|SREBF1|TBP|FOS|ETV4|SIRT1…
45944	3.075e-20	2.1409e-18	32	388	positive regulation of transcription from RNA polymerase II promoter	ATF1|CEBPB|HDAC2|HDAC1|AHR|BRCA1|ELK1|ETS1|TNF|RELA|CREB3L4|EGR1|STAT5B|SREBF1|SMARCC1|CREBBP|JUN|TGFB1|STAT3|NFATC3|NFATC2|FOS|SMARCA4|VEGFA|FOSL1|NFKBIA|CREB3|CREB1|SP1|IRF1|SQSTM1|ATF4
48523	1.7673e-17	1.1932e-15	56	1843	negative regulation of cellular process	ATF1|SPI1|EPO|BRCA1|RBPJ|ELK1|ETS1|TNF|ELK3|YY1|TRIM28|MYC|AKT1|SMARCC2|FBXW7|PRKCD|SIRT1|NCOR2|CREB3|KAT2B|NCOR1|IFNG|PIK3CA|DDIT3|IRF2|SQSTM1|CEBPB|HDAC2|HDAC3|HDAC1|CUL3|CUL1|BAZ2A|PTGS2|EGFR|RELA|MAPK8|CCL2|MAPK1|MAP2K6|EGR1|STAT5B|CREBBP|JUN|TGFB1|STAT3|SMARCA4|VEGFA|FOSL1|NFKBIA|IL8|APC|SP1|CDK1|FOSB|ATM
48519	3.4197e-17	2.2409e-15	58	2019	negative regulation of biological process	ATF1|SPI1|EPO|BRCA1|RBPJ|ELK1|ETS1|TNF|ELK3|YY1|TRIM28|MYC|AKT1|SMARCC2|FBXW7|PRKCD|SIRT1|NCOR2|CREB3|KAT2B|NCOR1|IFNG|PIK3CA|DDIT3|IRF2|SQSTM1|CEBPB|HDAC2|HDAC3|HDAC1|CUL3|CUL1|BAZ2A|PTGS2|EGFR|RELA|MAPK8|CCL5|CCL2|MAPK1|MAP2K6|EGR1|STAT5B|CREBBP|JUN|TGFB1|STAT3|KLF2|SMARCA4|VEGFA|FOSL1|NFKBIA|IL8|APC|SP1|CDK1|FOSB|ATM
51726	3.7795e-16	2.4059e-14	30	446	regulation of cell cycle	HDAC2|HDAC3|HDAC1|CUL3|CUL1|BRCA1|PTGS2|BACH1|ETS1|TNF|EGFR|MYC|AKT1|MAP2K6|STAT5B|CREBBP|JUN|TGFB1|FBXW7|PLK1|SMARCA4|FOSL1|CREB3|KAT2B|IL8|IFNG|APC|DDIT3|CDK1|ATM
42981	2.1498e-15	1.3305e-13	38	852	regulation of apoptosis	ATF1|CEBPB|HDAC3|EPO|HDAC1|CUL3|CUL1|BRCA1|RBPJ|PTGS2|ELK1|ETS1|TNF|EGFR|RELA|ELK3|MAPK8|AKT1|CCL2|MAPK1|MAP2K6|STAT5B|JUN|TGFB1|STAT1|SIRT1|VEGFA|FOSL1|NFKBIA|KAT2A|CREB1|IFNG|PIK3CA|APC|DDIT3|CDK1|ATM|SQSTM1
42221	2.7613e-15	1.6627e-13	48	1464	response to chemical stimulus	ATF1|HDAC2|HDAC3|EPO|SRC|AHR|BRCA1|PTGS2|ETS1|TNF|EGFR|RELA|MAPK8|CREB3L3|CREB3L4|CREB3L1|MYC|CCL5|CREB3L2|AKT1|CCL2|MAPK1|FYN|MAP2K6|MAPK3|EGR1|STAT5B|SMARCC1|CREBBP|JUN|TGFB1|STAT1|STAT3|FOS|KLF2|VEGFA|FOSL1|NFKBIA|CREB3|KAT2B|CREB1|IL8|IFNG|APC|DDIT3|CDK1|GRB2|NFE2L2
43067	2.9612e-15	1.7362e-13	38	860	regulation of programmed cell death	ATF1|CEBPB|HDAC3|EPO|HDAC1|CUL3|CUL1|BRCA1|RBPJ|PTGS2|ELK1|ETS1|TNF|EGFR|RELA|ELK3|MAPK8|AKT1|CCL2|MAPK1|MAP2K6|STAT5B|JUN|TGFB1|STAT1|SIRT1|VEGFA|FOSL1|NFKBIA|KAT2A|CREB1|IFNG|PIK3CA|APC|DDIT3|CDK1|ATM|SQSTM1
10941	3.9077e-15	2.2324e-13	38	867	regulation of cell death	ATF1|CEBPB|HDAC3|EPO|HDAC1|CUL3|CUL1|BRCA1|RBPJ|PTGS2|ELK1|ETS1|TNF|EGFR|RELA|ELK3|MAPK8|AKT1|CCL2|MAPK1|MAP2K6|STAT5B|JUN|TGFB1|STAT1|SIRT1|VEGFA|FOSL1|NFKBIA|KAT2A|CREB1|IFNG|PIK3CA|APC|DDIT3|CDK1|ATM|SQSTM1
10033	4.3974e-15	2.4494e-13	38	870	response to organic substance	ATF1|HDAC2|EPO|SRC|BRCA1|PTGS2|TNF|EGFR|RELA|CREB3L3|CREB3L4|CREB3L1|CCL5|CREB3L2|AKT1|CCL2|MAPK1|FYN|MAPK3|EGR1|STAT5B|SMARCC1|JUN|TGFB1|STAT1|STAT3|FOS|KLF2|FOSL1|NFKBIA|CREB3|KAT2B|CREB1|IFNG|DDIT3|CDK1|GRB2|NFE2L2
6950	5.6639e-15	3.0779e-13	52	1773	response to stress	EPO|AHR|BRCA1|BACH1|TNF|ELK3|CREB3L3|CREB3L4|CREB3L1|CREB3L2|AKT1|CD36|SREBF1|FOS|SIRT1|RBX1|FGR|CREB3|ELF3|IFNG|DDIT3|SQSTM1|ATF4|CEBPB|HDAC2|PTGS2|EGFR|RELA|MAPK8|CCL5|CCL2|MAPK1|MAP2K6|MAPK3|STAT5B|CREBBP|JUN|TGFB1|STAT1|PLK1|STAT3|NFATC3|KLF2|NFATC4|VEGFA|FOSL1|IL8|APC|CDK1|ATM|NOX1|NFE2L2
51716	4.2268e-14	2.2422e-12	39	987	cellular response to stimulus	HDAC2|EPO|BRCA1|BACH1|MAPK8|CCL5|CREB3L2|AKT1|CCL2|MAPK1|MAP2K6|MAPK3|EGR1|STAT5B|SREBF1|SMARCC1|JUN|TGFB1|STAT1|PLK1|STAT3|FOS|SIRT1|KLF2|RBX1|VEGFA|FOSL1|NFKBIA|KAT2B|IL8|IFNG|APC|DDIT3|CDK1|ATM|GRB2|SQSTM1|ATF4|NFE2L2
32502	5.3193e-12	2.7561e-10	65	3232	developmental process	ATF1|EPO|KEAP1|AHR|RBPJ|TNF|ETS2|ELK3|YY1|TRIM28|MYC|CREB3L2|AKT1|SMARCC1|SMARCC2|PRKCD|EBF1|FOS|SIRT1|ETV6|ETV7|NCOR2|KAT2A|CREB1|ELF3|IFNG|DDIT3|IRF1|SQSTM1|CEBPB|HDAC2|HDAC3|CUL3|CREM|CUL1|PTGS2|EGFR|RELA|RELB|MAPK8|CCL5|CCL2|MAPK1|FYN|MAPK3|EGR1|NFE2|STAT5B|CREBBP|JUN|JUND|TGFB1|STAT3|NFATC3|NFATC4|SMARCA4|VEGFA|IL8|APC|SP1|CDK1|FOSB|ATM|GRB2|NOX1
45786	1.8242e-11	9.2373e-10	18	176	negative regulation of cell cycle	HDAC2|TGFB1|HDAC3|HDAC1|CUL3|CUL1|ETS1|EGFR|SMARCA4|CREB3|KAT2B|IL8|IFNG|APC|MYC|DDIT3|ATM|MAP2K6
32583	3.3099e-11	1.6388e-09	19	212	regulation of gene-specific transcription	ATF1|HDAC2|SPI1|TGFB1|HDAC3|EPO|HDAC1|BRCA1|ETS1|TNF|SIRT1|RELA|SMARCA4|YY1|NFKBIA|NCOR2|CREB1|NCOR1|TRIM28
51704	3.8385e-11	1.8591e-09	32	784	multi-organism process	EPO|HDAC1|SRC|CUL1|PTGS2|TNF|RELA|CCL5|CCL2|MAPK1|FYN|MAPK3|GADD45GIP1|STAT5B|CREBBP|JUN|TGFB1|TBP|STAT1|STAT3|FOS|SIRT1|FOSL1|NFKBIA|FGR|CREB3|KAT2B|KAT2A|CREB1|IFNG|SP1|GRB2
44419	7.2995e-11	3.4603e-09	22	327	interspecies interaction between organisms	GADD45GIP1|CREBBP|JUN|TGFB1|TBP|HDAC1|SRC|STAT1|STAT3|CUL1|SIRT1|RELA|NFKBIA|CREB3|KAT2B|KAT2A|CREB1|SP1|MAPK1|GRB2|FYN|MAPK3
42493	8.2247e-11	3.8176e-09	20	256	response to drug	JUN|HDAC2|TGFB1|HDAC3|STAT1|STAT3|FOS|PTGS2|TNF|RELA|FOSL1|CREB1|IFNG|APC|MYC|DDIT3|CCL5|CDK1|CCL2|MAP2K6
50896	1.1024e-10	5.0126e-09	67	3631	response to stimulus	ATF1|EPO|AHR|BRCA1|BACH1|ETS1|TNF|ELK3|CREB3L3|CREB3L4|CREB3L1|MYC|CREB3L2|AKT1|CD36|SREBF1|SMARCC1|PRKCD|FOS|SIRT1|RBX1|FGR|CREB3|KAT2B|CREB1|ELF3|IFNG|DDIT3|SQSTM1|ATF4|CEBPB|HDAC2|HDAC3|SRC|PTGS2|EGFR|RELA|RELB|MAPK8|CCL5|CCL2|MAPK1|FYN|MAP2K6|MAPK3|EGR1|STAT5B|CREBBP|JUN|TGFB1|STAT1|PLK1|STAT3|NFATC3|KLF2|NFATC4|VEGFA|FOSL1|NFKBIA|IL8|APC|CDK1|FOSB|ATM|GRB2|NOX1|NFE2L2
6366	1.61e-10	7.1744e-09	19	231	transcription from RNA polymerase II promoter	CEBPB|TBP|CEBPD|STAT1|NFATC3|NFATC1|AHR|ETS1|NFATC4|FOSL1|ETV7|KAT2A|TADA2A|NCOR1|ELF3|DDIT3|IRF1|NFE2L2|CREB5
44260	3.6089e-10	1.5766e-08	65	3508	cellular macromolecule metabolic process	ATF1|EPO|AHR|BRCA1|RBPJ|BACH1|ETS1|TNF|MYSM1|TRIM28|AKT1|CD36|TBP|FBXW7|PRKCD|FOS|SIRT1|RBX1|ETV7|FGR|CREB3|KAT2B|KAT2A|CREB1|NCOR1|ELF3|IFNG|PIK3CA|DDIT3|IRF1|ERF|SQSTM1|CREB5|CEBPB|HDAC2|HDAC3|CEBPD|HDAC1|SRC|CUL3|CUL1|BAZ2A|EGFR|RELA|MAPK8|CCL2|MAPK1|FYN|MAP2K6|MAPK3|CREBBP|TGFB1|YES1|STAT1|PLK1|NFATC3|NFATC1|NFATC4|VEGFA|FOSL1|TADA2A|CDK1|ATM|GRB2|NFE2L2
9607	5.8796e-10	2.5192e-08	24	448	response to biotic stimulus	STAT5B|JUN|TGFB1|EPO|STAT1|FOS|PTGS2|TNF|RELA|FOSL1|NFKBIA|FGR|CREB3|CREB3L3|IFNG|CREB3L4|CREB3L1|DDIT3|CCL5|CREB3L2|CCL2|MAPK1|NFE2L2|MAPK3
48731	7.4111e-10	3.1155e-08	53	2420	system development	ATF1|EPO|AHR|RBPJ|TNF|ETS2|ELK3|YY1|TRIM28|MYC|CREB3L2|AKT1|SMARCC1|SMARCC2|FOS|SIRT1|ETV7|NCOR2|KAT2A|CREB1|ELF3|IFNG|DDIT3|IRF1|CEBPB|HDAC2|HDAC3|CUL1|PTGS2|EGFR|RELA|RELB|MAPK8|CCL2|MAPK1|FYN|MAPK3|EGR1|STAT5B|JUN|JUND|TGFB1|STAT3|NFATC3|SMARCA4|VEGFA|IL8|APC|SP1|CDK1|ATM|GRB2|NOX1
7275	7.6935e-10	3.1743e-08	59	2969	multicellular organismal development	ATF1|EPO|KEAP1|AHR|RBPJ|TNF|ETS2|ELK3|YY1|TRIM28|MYC|CREB3L2|AKT1|SMARCC1|SMARCC2|EBF1|FOS|SIRT1|ETV7|NCOR2|KAT2A|CREB1|ELF3|IFNG|DDIT3|IRF1|CEBPB|HDAC2|HDAC3|CUL3|CREM|CUL1|PTGS2|EGFR|RELA|RELB|MAPK8|CCL2|MAPK1|FYN|MAPK3|EGR1|NFE2|STAT5B|JUN|JUND|TGFB1|STAT3|NFATC3|SMARCA4|VEGFA|IL8|APC|SP1|CDK1|FOSB|ATM|GRB2|NOX1
6351	9.4207e-10	3.8158e-08	20	291	transcription, DNA-dependent	CEBPB|TBP|CEBPD|STAT1|NFATC3|NFATC1|AHR|ETS1|NFATC4|FOSL1|ETV7|KAT2A|TADA2A|CREB1|NCOR1|ELF3|DDIT3|IRF1|NFE2L2|CREB5
51239	9.5909e-10	3.8158e-08	35	1065	regulation of multicellular organismal process	ATF1|CEBPB|HDAC2|SPI1|HDAC3|EPO|SRC|KEAP1|PTGS2|ETS1|TNF|EGFR|RELA|MYC|CCL5|AKT1|CCL2|EGR1|STAT5B|JUN|JUND|TGFB1|STAT3|KLF2|VEGFA|NFKBIA|CREB1|IFNG|PIK3CA|APC|IRF1|CDK1|REL|NOX1|NFE2L2
43687	1.0294e-09	4.0237e-08	38	1266	post-translational protein modification	HDAC2|HDAC3|HDAC1|SRC|CUL3|CUL1|BAZ2A|BRCA1|TNF|MYSM1|EGFR|MAPK8|TRIM28|AKT1|CCL2|MAPK1|FYN|MAP2K6|MAPK3|CREBBP|TGFB1|YES1|FBXW7|STAT1|PRKCD|PLK1|SIRT1|RBX1|FGR|KAT2B|KAT2A|TADA2A|CREB1|IFNG|PIK3CA|ERF|CDK1|ATM
32774	1.2185e-09	4.6809e-08	20	295	RNA biosynthetic process	CEBPB|TBP|CEBPD|STAT1|NFATC3|NFATC1|AHR|ETS1|NFATC4|FOSL1|ETV7|KAT2A|TADA2A|CREB1|NCOR1|ELF3|DDIT3|IRF1|NFE2L2|CREB5
48513	1.3621e-09	5.1438e-08	45	1791	organ development	ATF1|CEBPB|HDAC2|HDAC3|EPO|CUL1|AHR|PTGS2|TNF|EGFR|RELA|ELK3|RELB|YY1|TRIM28|MYC|CREB3L2|AKT1|CCL2|MAPK1|FYN|MAPK3|EGR1|STAT5B|SMARCC1|JUN|TGFB1|STAT3|NFATC3|SIRT1|VEGFA|ETV7|NCOR2|KAT2A|CREB1|IL8|ELF3|APC|SP1|DDIT3|IRF1|CDK1|ATM|GRB2|NOX1
48856	1.8811e-09	6.9852e-08	55	2654	anatomical structure development	ATF1|EPO|AHR|RBPJ|TNF|ETS2|ELK3|YY1|TRIM28|MYC|CREB3L2|AKT1|SMARCC1|SMARCC2|FOS|SIRT1|ETV7|NCOR2|KAT2A|CREB1|ELF3|IFNG|DDIT3|IRF1|CEBPB|HDAC2|HDAC3|CUL3|CUL1|PTGS2|EGFR|RELA|RELB|MAPK8|CCL2|MAPK1|FYN|MAPK3|EGR1|STAT5B|CREBBP|JUN|JUND|TGFB1|STAT3|NFATC3|SMARCA4|VEGFA|IL8|APC|SP1|CDK1|ATM|GRB2|NOX1
42127	2.1722e-09	7.9338e-08	31	847	regulation of cell proliferation	HDAC2|EPO|HDAC1|CUL3|CUL1|BRCA1|RBPJ|PTGS2|ETS1|TNF|EGFR|RELA|MYC|CCL2|MAPK1|STAT5B|JUN|TGFB1|STAT1|SIRT1|VEGFA|FOSL1|NFKBIA|CREB3|KAT2B|IL8|IFNG|APC|CDK1|ATF3|NOX1
6350	2.2967e-09	8.2533e-08	21	345	transcription	CEBPB|TBP|CEBPD|STAT1|NFATC3|NFATC1|AHR|ETS1|NFATC4|FOSL1|ETV7|CREB3|KAT2A|TADA2A|CREB1|NCOR1|ELF3|DDIT3|IRF1|NFE2L2|CREB5
32501	7.0412e-09	2.453e-07	71	4374	multicellular organismal process	ATF1|EPO|KEAP1|AHR|RBPJ|TNF|ETS2|ELK3|YY1|TRIM28|CREB3L4|MYC|CREB3L2|AKT1|CD36|SMARCC1|SMARCC2|TBP|PRKCD|EBF1|FOS|SIRT1|ETV7|NCOR2|CREB3|KAT2A|CREB1|ELF3|IFNG|DDIT3|IRF1|CEBPB|HDAC2|HDAC3|SRC|CUL3|CREM|CUL1|PTGS2|EGFR|RELA|RELB|MAPK8|CCL2|MAPK1|FYN|MAP2K6|MAPK3|EGR1|NFE2|STAT5B|JUN|JUND|TGFB1|YES1|STAT1|STAT3|NFATC3|NFATC2|SMARCA4|VEGFA|FOSL1|IL8|APC|SP1|CDK1|REL|FOSB|ATM|GRB2|NOX1
48661	7.0465e-09	2.453e-07	9	29	positive regulation of smooth muscle cell proliferation	STAT5B|JUN|STAT1|RBPJ|PTGS2|TNF|NOX1|EGFR|VEGFA
48660	1.1488e-08	3.9379e-07	10	44	regulation of smooth muscle cell proliferation	STAT5B|JUN|IFNG|STAT1|RBPJ|PTGS2|TNF|NOX1|EGFR|VEGFA
43066	1.2157e-08	4.1039e-07	21	376	negative regulation of apoptosis	ATF1|STAT5B|CEBPB|HDAC3|HDAC1|RBPJ|ELK1|TNF|EGFR|RELA|ELK3|VEGFA|NFKBIA|MAPK8|PIK3CA|APC|CDK1|AKT1|CCL2|ATM|SQSTM1
50793	1.4483e-08	4.8163e-07	29	790	regulation of developmental process	ATF1|HDAC2|SPI1|EPO|KEAP1|PTGS2|ETS1|TNF|RELA|MYC|CCL5|AKT1|CCL2|MAPK1|FYN|CD36|STAT5B|CREBBP|JUN|JUND|TGFB1|SIRT1|VEGFA|NFKBIA|NCOR2|IFNG|APC|CDK1|NFE2L2
43069	1.5671e-08	5.1346e-07	21	381	negative regulation of programmed cell death	ATF1|STAT5B|CEBPB|HDAC3|HDAC1|RBPJ|ELK1|TNF|EGFR|RELA|ELK3|VEGFA|NFKBIA|MAPK8|PIK3CA|APC|CDK1|AKT1|CCL2|ATM|SQSTM1
60548	2.334e-08	7.5365e-07	21	389	negative regulation of cell death	ATF1|STAT5B|CEBPB|HDAC3|HDAC1|RBPJ|ELK1|TNF|EGFR|RELA|ELK3|VEGFA|NFKBIA|MAPK8|PIK3CA|APC|CDK1|AKT1|CCL2|ATM|SQSTM1
70887	3.79e-08	1.2063e-06	21	399	cellular response to chemical stimulus	EGR1|STAT5B|SMARCC1|TGFB1|EPO|STAT1|STAT3|BRCA1|FOS|KLF2|VEGFA|KAT2B|IL8|IFNG|DDIT3|CCL5|CDK1|AKT1|CCL2|GRB2|NFE2L2
8284	6.6413e-08	2.0841e-06	22	458	positive regulation of cell proliferation	STAT5B|JUN|HDAC2|TGFB1|EPO|HDAC1|STAT1|CUL3|RBPJ|PTGS2|TNF|EGFR|RELA|VEGFA|FOSL1|IFNG|MYC|CDK1|CCL2|MAPK1|ATF3|NOX1
43170	7.6981e-08	2.3821e-06	66	4017	macromolecule metabolic process	ATF1|EPO|AHR|BRCA1|RBPJ|BACH1|ETS1|TNF|MYSM1|TRIM28|AKT1|CD36|TBP|FBXW7|PRKCD|FOS|SIRT1|RBX1|ETV7|FGR|CREB3|KAT2B|KAT2A|CREB1|NCOR1|ELF3|IFNG|PIK3CA|DDIT3|IRF1|ERF|SQSTM1|CREB5|CEBPB|HDAC2|HDAC3|CEBPD|HDAC1|SRC|CUL3|CUL1|BAZ2A|EGFR|RELA|MAPK8|CCL2|MAPK1|FYN|MAP2K6|MAPK3|CREBBP|TGFB1|YES1|STAT1|PLK1|NFATC3|NFATC1|NFATC4|VEGFA|FOSL1|TADA2A|APC|CDK1|ATM|GRB2|NFE2L2
10551	1.5123e-07	4.6157e-06	14	154	regulation of gene-specific transcription from RNA polymerase II promoter	ATF1|HDAC2|TGFB1|HDAC3|HDAC1|BRCA1|ETS1|SIRT1|SMARCA4|YY1|NFKBIA|NCOR2|CREB1|NCOR1
45892	2.9014e-07	8.661e-06	20	397	negative regulation of transcription, DNA-dependent	EGR1|HDAC2|SPI1|SMARCC2|TGFB1|HDAC3|HDAC1|STAT3|BAZ2A|RBPJ|TNF|SIRT1|RELA|SMARCA4|YY1|NCOR2|NCOR1|TRIM28|IRF2|FOSB
16481	2.9155e-07	8.661e-06	22	494	negative regulation of transcription	EGR1|HDAC2|SPI1|SMARCC2|TGFB1|HDAC3|HDAC1|STAT3|BAZ2A|BRCA1|RBPJ|TNF|SIRT1|RELA|ELK3|SMARCA4|YY1|NCOR2|NCOR1|TRIM28|IRF2|FOSB
6464	3.2361e-07	9.4868e-06	38	1526	protein modification process	HDAC2|HDAC3|HDAC1|SRC|CUL3|CUL1|BAZ2A|BRCA1|TNF|MYSM1|EGFR|MAPK8|TRIM28|AKT1|CCL2|MAPK1|FYN|MAP2K6|MAPK3|CREBBP|TGFB1|YES1|FBXW7|STAT1|PRKCD|PLK1|SIRT1|RBX1|FGR|KAT2B|KAT2A|TADA2A|CREB1|IFNG|PIK3CA|ERF|CDK1|ATM
43412	3.4996e-07	1.0126e-05	39	1607	macromolecule modification	HDAC2|HDAC3|HDAC1|SRC|CUL3|CUL1|BAZ2A|BRCA1|TNF|MYSM1|EGFR|MAPK8|TRIM28|AKT1|CCL2|MAPK1|FYN|MAP2K6|MAPK3|CREBBP|TGFB1|YES1|FBXW7|STAT1|PRKCD|PLK1|FOS|SIRT1|RBX1|FGR|KAT2B|KAT2A|TADA2A|CREB1|IFNG|PIK3CA|ERF|CDK1|ATM
34097	3.9023e-07	1.1147e-05	12	107	response to cytokine stimulus	FOSL1|STAT5B|JUN|EPO|SRC|STAT1|CCL5|STAT3|FOS|PTGS2|RELA|KLF2
51253	3.9725e-07	1.1204e-05	20	404	negative regulation of RNA metabolic process	EGR1|HDAC2|SPI1|SMARCC2|TGFB1|HDAC3|HDAC1|STAT3|BAZ2A|RBPJ|TNF|SIRT1|RELA|SMARCA4|YY1|NCOR2|NCOR1|TRIM28|IRF2|FOSB
45934	4.2758e-07	1.1908e-05	23	556	negative regulation of nucleobase, nucleoside, nucleotide and nucleic acid metabolic process	EGR1|HDAC2|SPI1|SMARCC2|TGFB1|HDAC3|FBXW7|HDAC1|STAT3|BAZ2A|BRCA1|RBPJ|TNF|SIRT1|RELA|ELK3|SMARCA4|YY1|NCOR2|NCOR1|TRIM28|IRF2|FOSB
31324	4.6328e-07	1.2743e-05	27	786	negative regulation of cellular metabolic process	HDAC2|SPI1|HDAC3|EPO|HDAC1|BAZ2A|BRCA1|RBPJ|TNF|RELA|ELK3|YY1|TRIM28|AKT1|EGR1|JUN|SMARCC2|TGFB1|FBXW7|PRKCD|STAT3|SIRT1|SMARCA4|NCOR2|NCOR1|IRF2|FOSB
43193	4.8931e-07	1.3295e-05	13	137	positive regulation of gene-specific transcription	ATF1|HDAC2|SPI1|TGFB1|EPO|HDAC1|BRCA1|ETS1|TNF|SMARCA4|NFKBIA|CREB1|TRIM28
71310	5.1577e-07	1.3845e-05	16	239	cellular response to organic substance	EGR1|STAT5B|SMARCC1|TGFB1|STAT1|STAT3|BRCA1|FOS|KLF2|KAT2B|IFNG|DDIT3|CDK1|AKT1|GRB2|NFE2L2
51172	5.3003e-07	1.4059e-05	23	562	negative regulation of nitrogen compound metabolic process	EGR1|HDAC2|SPI1|SMARCC2|TGFB1|HDAC3|FBXW7|HDAC1|STAT3|BAZ2A|BRCA1|RBPJ|TNF|SIRT1|RELA|ELK3|SMARCA4|YY1|NCOR2|NCOR1|TRIM28|IRF2|FOSB
33554	5.7748e-07	1.5137e-05	24	619	cellular response to stress	SREBF1|JUN|HDAC2|EPO|PLK1|BRCA1|FOS|BACH1|SIRT1|KLF2|RBX1|MAPK8|IFNG|APC|DDIT3|CREB3L2|CDK1|MAPK1|ATM|SQSTM1|ATF4|MAP2K6|NFE2L2|MAPK3
48583	9.1e-07	2.3575e-05	22	524	regulation of response to stimulus	STAT5B|TGFB1|HDAC3|PRKCD|BRCA1|PTGS2|TNF|SIRT1|RELA|VEGFA|NFKBIA|CREB3|NCOR1|IL8|IFNG|APC|CCL5|AKT1|CCL2|MAPK1|ATM|FYN
32496	1.0213e-06	2.6154e-05	12	116	response to lipopolysaccharide	NFKBIA|STAT5B|JUN|EPO|STAT1|CCL5|CCL2|MAPK1|FOS|PTGS2|RELA|MAPK3
51789	1.2505e-06	3.166e-05	12	118	response to protein stimulus	EGR1|CREB3|TGFB1|CREB3L3|IFNG|CREB3L4|CREB3L1|DDIT3|CREB3L2|CDK1|FOS|NFE2L2
10558	1.5413e-06	3.8585e-05	23	593	negative regulation of macromolecule biosynthetic process	EGR1|HDAC2|SPI1|SMARCC2|TGFB1|HDAC3|FBXW7|HDAC1|STAT3|BAZ2A|BRCA1|RBPJ|TNF|SIRT1|RELA|ELK3|SMARCA4|YY1|NCOR2|NCOR1|TRIM28|IRF2|FOSB
51094	1.9662e-06	4.8112e-05	18	347	positive regulation of developmental process	ATF1|STAT5B|JUN|JUND|TGFB1|EPO|PTGS2|ETS1|TNF|RELA|VEGFA|IFNG|APC|MYC|CCL5|CDK1|AKT1|CD36
43065	1.9692e-06	4.8112e-05	20	442	positive regulation of apoptosis	JUN|CEBPB|TGFB1|STAT1|CUL3|CUL1|BRCA1|PTGS2|ETS1|TNF|FOSL1|MAPK8|IFNG|APC|DDIT3|AKT1|MAPK1|ATM|SQSTM1|MAP2K6
9719	1.9867e-06	4.8112e-05	21	493	response to endogenous stimulus	EGR1|STAT5B|SMARCC1|TGFB1|EPO|STAT1|STAT3|BRCA1|FOS|PTGS2|TNF|RELA|FOSL1|KAT2B|DDIT3|CCL5|CDK1|AKT1|CCL2|MAPK1|GRB2
43068	2.2189e-06	5.3158e-05	20	445	positive regulation of programmed cell death	JUN|CEBPB|TGFB1|STAT1|CUL3|CUL1|BRCA1|PTGS2|ETS1|TNF|FOSL1|MAPK8|IFNG|APC|DDIT3|AKT1|MAPK1|ATM|SQSTM1|MAP2K6
9605	2.3756e-06	5.5714e-05	22	551	response to external stimulus	SREBF1|JUN|TGFB1|EPO|STAT1|FOS|PTGS2|TNF|SIRT1|RELA|VEGFA|FOSL1|CREB3|IL8|IFNG|DDIT3|CCL5|AKT1|CCL2|MAPK1|FYN|SQSTM1
10629	2.3756e-06	5.5714e-05	22	551	negative regulation of gene expression	EGR1|HDAC2|SPI1|SMARCC2|TGFB1|HDAC3|HDAC1|STAT3|BAZ2A|BRCA1|RBPJ|TNF|SIRT1|RELA|ELK3|SMARCA4|YY1|NCOR2|NCOR1|TRIM28|IRF2|FOSB
45595	2.5448e-06	5.9061e-05	22	553	regulation of cell differentiation	ATF1|STAT5B|CREBBP|JUN|HDAC2|SPI1|JUND|TGFB1|EPO|KEAP1|ETS1|TNF|SIRT1|RELA|NFKBIA|NCOR2|IFNG|APC|CCL5|AKT1|MAPK1|CD36
10942	2.598e-06	5.9673e-05	20	449	positive regulation of cell death	JUN|CEBPB|TGFB1|STAT1|CUL3|CUL1|BRCA1|PTGS2|ETS1|TNF|FOSL1|MAPK8|IFNG|APC|DDIT3|AKT1|MAPK1|ATM|SQSTM1|MAP2K6
31327	2.7784e-06	6.3166e-05	23	611	negative regulation of cellular biosynthetic process	EGR1|HDAC2|SPI1|SMARCC2|TGFB1|HDAC3|FBXW7|HDAC1|STAT3|BAZ2A|BRCA1|RBPJ|TNF|SIRT1|RELA|ELK3|SMARCA4|YY1|NCOR2|NCOR1|TRIM28|IRF2|FOSB
2237	2.9723e-06	6.6893e-05	12	127	response to molecule of bacterial origin	NFKBIA|STAT5B|JUN|EPO|STAT1|CCL5|CCL2|MAPK1|FOS|PTGS2|RELA|MAPK3
9617	3.3228e-06	7.4031e-05	15	231	response to bacterium	STAT5B|JUN|EPO|STAT1|FOS|PTGS2|TNF|RELA|NFKBIA|FGR|IFNG|CCL5|CCL2|MAPK1|MAPK3
9890	3.8196e-06	8.4257e-05	23	621	negative regulation of biosynthetic process	EGR1|HDAC2|SPI1|SMARCC2|TGFB1|HDAC3|FBXW7|HDAC1|STAT3|BAZ2A|BRCA1|RBPJ|TNF|SIRT1|RELA|ELK3|SMARCA4|YY1|NCOR2|NCOR1|TRIM28|IRF2|FOSB
9892	3.8769e-06	8.4684e-05	27	864	negative regulation of metabolic process	HDAC2|SPI1|HDAC3|EPO|HDAC1|BAZ2A|BRCA1|RBPJ|TNF|RELA|ELK3|YY1|TRIM28|AKT1|EGR1|JUN|SMARCC2|TGFB1|FBXW7|PRKCD|STAT3|SIRT1|SMARCA4|NCOR2|NCOR1|IRF2|FOSB
10605	4.0101e-06	8.6744e-05	26	802	negative regulation of macromolecule metabolic process	HDAC2|SPI1|HDAC3|EPO|HDAC1|BAZ2A|BRCA1|RBPJ|TNF|RELA|ELK3|YY1|TRIM28|EGR1|JUN|SMARCC2|TGFB1|FBXW7|PRKCD|STAT3|SIRT1|SMARCA4|NCOR2|NCOR1|IRF2|FOSB
6916	4.7125e-06	0.00010096	14	199	anti-apoptosis	ATF1|STAT5B|CEBPB|HDAC3|HDAC1|TNF|RELA|VEGFA|NFKBIA|PIK3CA|CDK1|AKT1|CCL2|SQSTM1
6338	6.2037e-06	0.00013164	9	58	chromatin remodeling	KAT2B|SMARCC1|KAT2A|HDAC2|SMARCC2|HDAC1|BAZ2A|SIRT1|SMARCA4
44237	6.6758e-06	0.00014032	71	4989	cellular metabolic process	ATF1|EPO|AHR|BRCA1|RBPJ|BACH1|ETS1|TNF|MYSM1|TRIM28|AKT1|CD36|TBP|FBXW7|PRKCD|FOS|SIRT1|RBX1|ETV7|FGR|CREB3|KAT2B|KAT2A|CREB1|NCOR1|ELF3|IFNG|PIK3CA|DDIT3|IRF1|ERF|SQSTM1|ATF3|ATF4|CREB5|CEBPB|HDAC2|HDAC3|CEBPD|HDAC1|SRC|CUL3|CREM|CUL1|BAZ2A|PTGS2|EGFR|RELA|MAPK8|CCL2|MAPK1|FYN|MAP2K6|MAPK3|STAT5B|CREBBP|TGFB1|YES1|STAT1|PLK1|NFATC3|NFATC1|NFATC4|VEGFA|FOSL1|TADA2A|CDK1|ATM|GRB2|NOX1|NFE2L2
7050	7.57e-06	0.00015763	11	108	cell cycle arrest	KAT2B|TGFB1|IL8|IFNG|APC|MYC|DDIT3|CUL3|CUL1|ATM|MAP2K6
44238	1.188e-05	0.00024508	73	5288	primary metabolic process	ATF1|EPO|AHR|BRCA1|RBPJ|BACH1|ETS1|TNF|MYSM1|TRIM28|AKT1|CD36|SREBF1|TBP|FBXW7|PRKCD|FOS|SIRT1|RBX1|ETV7|FGR|CREB3|KAT2B|KAT2A|CREB1|NCOR1|ELF3|IFNG|PIK3CA|DDIT3|IRF1|ERF|SQSTM1|ATF3|UGT2B7|ATF4|CREB5|CEBPB|HDAC2|HDAC3|CEBPD|HDAC1|SRC|CUL3|CREM|CUL1|BAZ2A|PTGS2|EGFR|RELA|MAPK8|CCL2|MAPK1|FYN|MAP2K6|MAPK3|STAT5B|CREBBP|TGFB1|YES1|STAT1|PLK1|NFATC3|NFATC1|NFATC4|VEGFA|FOSL1|TADA2A|APC|CDK1|ATM|NOX1…
9725	1.3399e-05	0.00027387	19	441	response to hormone stimulus	EGR1|STAT5B|SMARCC1|TGFB1|EPO|STAT1|STAT3|BRCA1|FOS|PTGS2|TNF|RELA|FOSL1|KAT2B|CCL5|AKT1|CCL2|MAPK1|GRB2
7568	1.3892e-05	0.00028137	12	145	aging	JUN|TGFB1|EPO|DDIT3|CCL5|PRKCD|CDK1|ATM|GRB2|FOS|SIRT1|RELA
9628	2.254e-05	0.00045047	18	404	response to abiotic stimulus	JUN|HDAC2|TGFB1|EPO|STAT1|BRCA1|FOS|TNF|EGFR|RELA|VEGFA|FOSL1|MAPK8|AKT1|CCL2|ATM|FYN|NOX1
9653	2.2645e-05	0.00045047	31	1218	anatomical structure morphogenesis	ATF1|HDAC3|CUL3|CUL1|TNF|EGFR|RELA|ELK3|YY1|TRIM28|MYC|CCL2|MAPK1|MAPK3|SMARCC1|JUN|TGFB1|STAT3|VEGFA|ETV7|NCOR2|KAT2A|CREB1|IL8|ELF3|APC|SP1|CDK1|ATM|GRB2|NOX1
51707	2.4274e-05	0.00047861	17	357	response to other organism	STAT5B|JUN|TGFB1|EPO|STAT1|FOS|PTGS2|TNF|RELA|FOSL1|NFKBIA|FGR|IFNG|CCL5|CCL2|MAPK1|MAPK3
48584	2.595e-05	0.00050716	15	268	positive regulation of response to stimulus	STAT5B|TGFB1|BRCA1|PTGS2|TNF|RELA|VEGFA|NFKBIA|CREB3|IL8|CCL5|CCL2|MAPK1|ATM|FYN
23034	2.9326e-05	0.00056816	30	1158	intracellular signaling pathway	SRC|CREM|BRCA1|BACH1|TNF|EGFR|MAPK8|AKT1|CCL2|MAPK1|FYN|CD36|MAP2K6|MAPK3|STAT5B|STAT1|PRKCD|PLK1|STAT3|NFATC1|NFKBIA|IL8|IFNG|PIK3CA|DDIT3|CDK1|ATM|GRB2|SQSTM1|NFE2L2
60	3.3752e-05	0.00064826	7	31	protein import into nucleus, translocation	NFKBIA|JUN|TGFB1|IFNG|AKT1|MAPK1|TNF
51240	4.2767e-05	0.0008144	15	278	positive regulation of multicellular organismal process	ATF1|STAT5B|HDAC2|TGFB1|PTGS2|TNF|EGFR|VEGFA|CREB1|IFNG|MYC|CCL5|CDK1|CCL2|NOX1
1817	6.061e-05	0.0011444	13	202	regulation of cytokine production	STAT5B|CEBPB|TGFB1|PTGS2|TNF|RELA|KLF2|CREB1|IFNG|IRF1|REL|CCL2|NOX1
122	6.2844e-05	0.0011703	15	286	negative regulation of transcription from RNA polymerase II promoter	EGR1|HDAC2|SPI1|TGFB1|HDAC3|HDAC1|STAT3|TNF|SMARCA4|YY1|NCOR2|NCOR1|TRIM28|IRF2|FOSB
6468	6.3034e-05	0.0011703	22	657	protein amino acid phosphorylation	TGFB1|YES1|SRC|STAT1|PRKCD|PLK1|TNF|EGFR|FGR|MAPK8|CREB1|TRIM28|IFNG|PIK3CA|CDK1|AKT1|CCL2|MAPK1|ATM|FYN|MAP2K6|MAPK3
30154	6.4668e-05	0.0011907	36	1666	cell differentiation	ATF1|CEBPB|HDAC2|EPO|CUL3|CREM|RBPJ|EGFR|RELA|RELB|TRIM28|CREB3L2|AKT1|FYN|EGR1|STAT5B|CREBBP|JUN|JUND|TGFB1|STAT3|SIRT1|NFATC4|ETV6|VEGFA|NCOR2|CREB1|ELF3|IFNG|APC|SP1|IRF1|CDK1|ATM|GRB2|SQSTM1
32844	7.0351e-05	0.0012848	11	133	regulation of homeostatic process	STAT5B|SPI1|TGFB1|IFNG|SRC|MYC|CCL5|PTGS2|ETS1|TNF|VEGFA
7049	8.5365e-05	0.0015463	24	794	cell cycle	GADD45GIP1|TGFB1|HDAC3|FBXW7|CUL3|PLK1|CUL1|AHR|BRCA1|EGFR|KAT2B|NCOR1|IL8|IFNG|APC|MYC|DDIT3|CDK1|AKT1|MAPK1|ATM|SKP2|MAP2K6|MAPK3
7165	0.0001278	0.0022963	38	1878	signal transduction	ATF1|EPO|SRC|CREM|BRCA1|BACH1|TNF|EGFR|RELA|ELK3|MAPK8|CCL5|AKT1|CCL2|MAPK1|FYN|CD36|MAP2K6|MAPK3|STAT5B|CREBBP|JUN|TGFB1|STAT1|PRKCD|PLK1|STAT3|FOS|NFKBIA|CREB1|IL8|IFNG|PIK3CA|APC|CDK1|ATM|GRB2|NOX1
48869	0.00013338	0.0023774	36	1712	cellular developmental process	ATF1|CEBPB|HDAC2|EPO|CUL3|CREM|RBPJ|EGFR|RELA|RELB|TRIM28|CREB3L2|AKT1|FYN|EGR1|STAT5B|CREBBP|JUN|JUND|TGFB1|STAT3|SIRT1|NFATC4|ETV6|VEGFA|NCOR2|CREB1|ELF3|IFNG|APC|SP1|IRF1|CDK1|ATM|GRB2|SQSTM1
9991	0.00018196	0.0032175	14	264	response to extracellular stimulus	SREBF1|JUN|TGFB1|EPO|STAT1|FOS|PTGS2|SIRT1|RELA|FOSL1|DDIT3|AKT1|CCL2|SQSTM1
9612	0.00020104	0.0035023	8	60	response to mechanical stimulus	FOSL1|JUN|STAT1|CCL2|FYN|FOS|TNF|RELA
32582	0.00020121	0.0035023	9	85	negative regulation of gene-specific transcription	YY1|NCOR2|HDAC2|NCOR1|HDAC3|HDAC1|TNF|RELA|SMARCA4
6979	0.00020794	0.0035914	12	184	response to oxidative stress	FOSL1|JUN|EPO|STAT1|DDIT3|CCL5|CDK1|FOS|PTGS2|EGFR|RELA|KLF2
48545	0.00022096	0.003787	13	225	response to steroid hormone stimulus	STAT5B|TGFB1|EPO|STAT3|BRCA1|FOS|PTGS2|TNF|RELA|FOSL1|CCL5|CCL2|MAPK1
302	0.00022327	0.0037973	9	86	response to reactive oxygen species	FOSL1|JUN|EPO|STAT1|DDIT3|CDK1|FOS|RELA|KLF2
6954	0.00022976	0.0038781	15	315	inflammatory response	STAT5B|CEBPB|TGFB1|STAT3|NFATC3|FOS|TNF|RELA|NFATC4|IL8|ELF3|CCL5|AKT1|CCL2|NOX1
14070	0.00023173	0.0038819	11	149	response to organic cyclic substance	ATF1|FOSL1|JUN|HDAC2|TGFB1|STAT1|STAT3|CDK1|FOS|PTGS2|RELA
32103	0.00024742	0.0041138	9	87	positive regulation of response to external stimulus	STAT5B|CREB3|TGFB1|IL8|CCL5|CCL2|PTGS2|TNF|VEGFA
9611	0.00037115	0.0061254	19	541	response to wounding	STAT5B|CEBPB|TGFB1|EPO|STAT3|NFATC3|FOS|TNF|RELA|ELK3|NFATC4|IL8|ELF3|CCL5|CDK1|AKT1|CCL2|CD36|NOX1
42542	0.00038395	0.0062899	8	65	response to hydrogen peroxide	FOSL1|JUN|EPO|STAT1|DDIT3|CDK1|RELA|KLF2
10035	0.00042983	0.0069902	13	238	response to inorganic substance	ATF1|JUN|EPO|STAT1|FOS|PTGS2|EGFR|RELA|KLF2|FOSL1|MAPK8|DDIT3|CDK1
6986	0.00048975	0.007907	8	67	response to unfolded protein	CREB3|CREB3L3|IFNG|CREB3L4|CREB3L1|DDIT3|CREB3L2|NFE2L2
44267	0.0005034	0.0080689	40	2153	cellular protein metabolic process	HDAC2|HDAC3|HDAC1|SRC|CUL3|CUL1|BAZ2A|BRCA1|TNF|MYSM1|EGFR|RELA|MAPK8|TRIM28|AKT1|CCL2|MAPK1|FYN|MAP2K6|MAPK3|CREBBP|TGFB1|YES1|FBXW7|STAT1|PRKCD|PLK1|SIRT1|RBX1|FGR|KAT2B|KAT2A|TADA2A|CREB1|IFNG|PIK3CA|ERF|CDK1|ATM|SQSTM1
40011	0.00053645	0.0085373	17	440	locomotion	ATF1|TGFB1|CUL3|ETS1|TNF|EGFR|VEGFA|FOSL1|CREB3|IL8|IFNG|CCL5|AKT1|CCL2|MAPK1|FYN|NOX1
50792	0.00066143	0.010452	6	28	regulation of viral reproduction	JUN|IL8|SP1|HDAC1|CCL5|TNF
23033	0.0008156	0.012797	39	2100	signaling pathway	SRC|CREM|BRCA1|RBPJ|BACH1|TNF|EGFR|RELA|MAPK8|AKT1|CCL2|MAPK1|FYN|CD36|MAP2K6|MAPK3|STAT5B|SMARCC1|JUN|TGFB1|STAT1|PRKCD|PLK1|STAT3|NFATC1|FOS|VEGFA|NFKBIA|CREB1|IL8|IFNG|PIK3CA|APC|DDIT3|CDK1|ATM|GRB2|SQSTM1|NFE2L2
10552	0.00091965	0.014329	9	101	positive regulation of gene-specific transcription from RNA polymerase II promoter	ATF1|NFKBIA|HDAC2|TGFB1|CREB1|HDAC1|BRCA1|ETS1|SMARCA4
9887	0.00093268	0.014431	20	635	organ morphogenesis	ATF1|SMARCC1|TGFB1|STAT3|CUL1|TNF|EGFR|RELA|VEGFA|YY1|ETV7|NCOR2|KAT2A|SP1|MYC|CDK1|CCL2|MAPK1|GRB2|MAPK3
71216	0.00098186	0.015087	7	49	cellular response to biotic stimulus	NFKBIA|IFNG|STAT1|DDIT3|MAPK1|NFE2L2|MAPK3
51272	0.0011582	0.017675	10	137	positive regulation of cellular component movement	STAT5B|CREB3|TGFB1|APC|CCL2|MAPK1|PTGS2|ETS1|EGFR|VEGFA
22402	0.0011715	0.017756	19	582	cell cycle process	TGFB1|HDAC3|FBXW7|CUL3|PLK1|CUL1|EGFR|KAT2B|NCOR1|IL8|IFNG|APC|MYC|DDIT3|CDK1|AKT1|ATM|SKP2|MAP2K6
51247	0.0011968	0.017985	14	307	positive regulation of protein metabolic process	HDAC2|TGFB1|EPO|PLK1|CUL1|BRCA1|TNF|VEGFA|NFKBIA|IFNG|APC|CDK1|AKT1|MAPK1
45637	0.0012028	0.017985	8	75	regulation of myeloid cell differentiation	NFKBIA|STAT5B|JUN|SPI1|APC|CCL5|ETS1|TNF
45084	0.001227	0.018225	4	7	positive regulation of interleukin-12 biosynthetic process	IFNG|IRF1|REL|RELA
51276	0.0012712	0.018756	18	525	chromosome organization	NFE2|SMARCC1|CREBBP|HDAC2|SMARCC2|HDAC3|FBXW7|HDAC1|BAZ2A|MYSM1|SIRT1|SMARCA4|KAT2B|KAT2A|TADA2A|NCOR1|APC|CDK1
16568	0.0014034	0.020571	14	311	chromatin modification	SMARCC1|CREBBP|HDAC2|SMARCC2|HDAC3|HDAC1|BAZ2A|MYSM1|SIRT1|SMARCA4|KAT2B|KAT2A|TADA2A|NCOR1
8152	0.0014941	0.021757	74	5958	metabolic process	ATF1|EPO|AHR|BRCA1|RBPJ|BACH1|ETS1|TNF|MYSM1|TRIM28|AKT1|CD36|SREBF1|TBP|FBXW7|PRKCD|FOS|SIRT1|RBX1|ETV7|FGR|CREB3|KAT2B|KAT2A|CREB1|NCOR1|ELF3|IFNG|PIK3CA|DDIT3|IRF1|ERF|SQSTM1|ATF3|UGT2B7|ATF4|CREB5|CEBPB|HDAC2|HDAC3|CEBPD|HDAC1|SRC|CUL3|CREM|CUL1|BAZ2A|PTGS2|EGFR|RELA|MAPK8|CCL2|MAPK1|FYN|MAP2K6|MAPK3|STAT5B|CREBBP|TGFB1|YES1|STAT1|PLK1|NFATC3|NFATC1|NFATC4|VEGFA|FOSL1|TADA2A|APC|CDK1|ATM|GRB2…
23014	0.0015332	0.021924	15	364	signal transmission via phosphorylation event	STAT5B|SRC|STAT1|STAT3|TNF|EGFR|NFKBIA|MAPK8|IFNG|PIK3CA|AKT1|CCL2|MAPK1|FYN|MAP2K6
7243	0.0015332	0.021924	15	364	intracellular protein kinase cascade	STAT5B|SRC|STAT1|STAT3|TNF|EGFR|NFKBIA|MAPK8|IFNG|PIK3CA|AKT1|CCL2|MAPK1|FYN|MAP2K6
16310	0.0015351	0.021924	22	786	phosphorylation	TGFB1|YES1|SRC|STAT1|PRKCD|PLK1|TNF|EGFR|FGR|MAPK8|CREB1|TRIM28|IFNG|PIK3CA|CDK1|AKT1|CCL2|MAPK1|ATM|FYN|MAP2K6|MAPK3
16575	0.0015487	0.021978	5	17	histone deacetylation	HDAC2|HDAC3|HDAC1|BAZ2A|SIRT1
90304	0.0015603	0.021986	31	1460	nucleic acid metabolic process	ATF1|CEBPB|CEBPD|BAZ2A|AHR|BRCA1|RBPJ|BACH1|ETS1|TBP|STAT1|NFATC3|NFATC1|FOS|SIRT1|RBX1|NFATC4|VEGFA|FOSL1|ETV7|CREB3|KAT2A|TADA2A|CREB1|NCOR1|ELF3|DDIT3|IRF1|ATM|NFE2L2|CREB5
51674	0.0015789	0.021986	14	314	localization of cell	ATF1|TGFB1|CUL3|ETS1|TNF|EGFR|VEGFA|IL8|IFNG|CCL5|AKT1|CCL2|FYN|NOX1
48870	0.0015789	0.021986	14	314	cell motility	ATF1|TGFB1|CUL3|ETS1|TNF|EGFR|VEGFA|IL8|IFNG|CCL5|AKT1|CCL2|FYN|NOX1
23046	0.0016631	0.022872	39	2156	signaling process	ATF1|EPO|SRC|CREM|BRCA1|BACH1|ELK1|TNF|EGFR|RELA|ELK3|MAPK8|CCL5|AKT1|CCL2|MAPK1|FYN|CD36|MAP2K6|MAPK3|STAT5B|CREBBP|JUN|TGFB1|STAT1|PRKCD|PLK1|STAT3|FOS|NFKBIA|CREB1|IL8|IFNG|PIK3CA|APC|CDK1|ATM|GRB2|NOX1
23060	0.0016631	0.022872	39	2156	signal transmission	ATF1|EPO|SRC|CREM|BRCA1|BACH1|ELK1|TNF|EGFR|RELA|ELK3|MAPK8|CCL5|AKT1|CCL2|MAPK1|FYN|CD36|MAP2K6|MAPK3|STAT5B|CREBBP|JUN|TGFB1|STAT1|PRKCD|PLK1|STAT3|FOS|NFKBIA|CREB1|IL8|IFNG|PIK3CA|APC|CDK1|ATM|GRB2|NOX1
16570	0.0017348	0.023712	10	143	histone modification	KAT2B|CREBBP|KAT2A|HDAC2|TADA2A|HDAC3|HDAC1|BAZ2A|MYSM1|SIRT1
16569	0.002108	0.028637	10	146	covalent chromatin modification	KAT2B|CREBBP|KAT2A|HDAC2|TADA2A|HDAC3|HDAC1|BAZ2A|MYSM1|SIRT1
45075	0.0024392	0.032739	4	8	regulation of interleukin-12 biosynthetic process	IFNG|IRF1|REL|RELA
90183	0.0024392	0.032739	4	8	regulation of kidney development	ATF1|TGFB1|MYC|VEGFA
16477	0.0029653	0.039561	13	281	cell migration	ATF1|TGFB1|CUL3|TNF|EGFR|VEGFA|IL8|IFNG|CCL5|AKT1|CCL2|FYN|NOX1
16070	0.0034437	0.045671	24	966	RNA metabolic process	ATF1|CEBPB|TBP|CEBPD|STAT1|NFATC3|NFATC1|AHR|ETS1|SIRT1|NFATC4|VEGFA|FOSL1|ETV7|KAT2A|TADA2A|CREB1|NCOR1|ELF3|DDIT3|IRF1|ATM|NFE2L2|CREB5
51270	0.0036524	0.048152	12	239	regulation of cellular component movement	STAT5B|CREB3|TGFB1|APC|AKT1|CCL2|MAPK1|RBPJ|PTGS2|ETS1|EGFR|VEGFA
51101	0.0041494	0.054382	10	157	regulation of DNA binding	NFKBIA|JUN|HDAC2|TGFB1|DDIT3|TNF|SIRT1|RELA|SMARCA4|MAPK3
32270	0.004251	0.055387	13	290	positive regulation of cellular protein metabolic process	HDAC2|TGFB1|EPO|PLK1|CUL1|BRCA1|TNF|VEGFA|NFKBIA|IFNG|CDK1|AKT1|MAPK1
31667	0.0043632	0.056398	12	243	response to nutrient levels	SREBF1|JUN|TGFB1|EPO|STAT1|DDIT3|AKT1|CCL2|PTGS2|SQSTM1|SIRT1|RELA
51246	0.0043792	0.056398	19	634	regulation of protein metabolic process	JUN|HDAC2|TGFB1|EPO|PRKCD|PLK1|CUL1|BRCA1|TNF|EGFR|RELA|VEGFA|NFKBIA|IFNG|APC|ERF|CDK1|AKT1|MAPK1
6139	0.004417	0.056558	34	1786	nucleobase, nucleoside, nucleotide and nucleic acid metabolic process	ATF1|CEBPB|CEBPD|BAZ2A|AHR|BRCA1|RBPJ|BACH1|ETS1|MAPK1|TGFB1|TBP|STAT1|NFATC3|NFATC1|FOS|SIRT1|RBX1|NFATC4|VEGFA|FOSL1|ETV7|CREB3|KAT2A|TADA2A|CREB1|NCOR1|ELF3|DDIT3|IRF1|ATM|NOX1|NFE2L2|CREB5
9059	0.0044566	0.056739	25	1054	macromolecule biosynthetic process	CEBPB|CEBPD|EPO|AHR|ETS1|TNF|EGFR|TBP|STAT1|NFATC3|NFATC1|SIRT1|NFATC4|FOSL1|ETV7|CREB3|KAT2A|TADA2A|CREB1|NCOR1|ELF3|DDIT3|IRF1|NFE2L2|CREB5
51098	0.0046723	0.059147	11	200	regulation of binding	NFKBIA|JUN|HDAC2|TGFB1|DDIT3|PRKCD|TNF|SIRT1|RELA|SMARCA4|MAPK3
34641	0.0059925	0.075431	37	2078	cellular nitrogen compound metabolic process	ATF1|CEBPB|CEBPD|BAZ2A|AHR|BRCA1|RBPJ|BACH1|ETS1|AKT1|MAPK1|STAT5B|TGFB1|TBP|STAT1|NFATC3|NFATC1|FOS|SIRT1|RBX1|NFATC4|VEGFA|FOSL1|ETV7|CREB3|KAT2A|TADA2A|CREB1|NCOR1|ELF3|DDIT3|IRF1|ATM|NOX1|ATF4|NFE2L2|CREB5
6476	0.006388	0.079801	5	22	protein amino acid deacetylation	HDAC2|HDAC3|HDAC1|BAZ2A|SIRT1
51054	0.0064471	0.079801	7	64	positive regulation of DNA metabolic process	ATF1|JUN|TGFB1|IFNG|EPO|CDK1|BRCA1
10553	0.0064471	0.079801	7	64	negative regulation of gene-specific transcription from RNA polymerase II promoter	YY1|NCOR2|HDAC2|NCOR1|HDAC3|HDAC1|SMARCA4
10646	0.0066955	0.082322	26	1154	regulation of cell communication	ATF1|HDAC3|EPO|CUL3|PTGS2|TNF|EGFR|RELA|AKT1|CCL2|MAP2K6|EGR1|TGFB1|PRKCD|SIRT1|VEGFA|NFKBIA|CREB1|NCOR1|IFNG|APC|SP1|REL|ATM|GRB2|SQSTM1
7610	0.0067247	0.082322	16	466	behavior	ATF1|EGR1|JUN|STAT3|FOS|PTGS2|VEGFA|FOSL1|CREB3|IL8|IFNG|CCL5|CCL2|MAPK1|FOSB|FYN
31663	0.0072295	0.088019	4	10	lipopolysaccharide-mediated signaling pathway	NFKBIA|STAT1|MAPK1|MAPK3
45597	0.0072909	0.088283	12	255	positive regulation of cell differentiation	STAT5B|JUN|JUND|TGFB1|IFNG|APC|EPO|CCL5|AKT1|CD36|ETS1|RELA
6325	0.0076872	0.092579	15	413	chromatin organization	NFE2|SMARCC1|CREBBP|HDAC2|SMARCC2|HDAC3|HDAC1|BAZ2A|MYSM1|SIRT1|SMARCA4|KAT2B|KAT2A|TADA2A|NCOR1
51052	0.0080288	0.096173	9	130	regulation of DNA metabolic process	ATF1|JUN|TGFB1|IFNG|EPO|FBXW7|MYC|CDK1|BRCA1
32879	0.0080812	0.096283	20	727	regulation of localization	ATF1|STAT5B|TGFB1|RBPJ|PTGS2|ETS1|TNF|SIRT1|EGFR|VEGFA|NFKBIA|CREB3|CREB1|IFNG|APC|CDK1|AKT1|CCL2|MAPK1|CD36
6928	0.0084222	0.099812	16	474	cellular component movement	ATF1|TGFB1|CUL3|STAT3|PTGS2|ETS1|TNF|EGFR|VEGFA|IL8|IFNG|CCL5|AKT1|CCL2|FYN|NOX1
2376	0.009423	0.11108	23	947	immune system process	EGR1|STAT5B|CEBPB|TGFB1|EPO|PRKCD|ETS1|TNF|RELA|RELB|VEGFA|NFKBIA|IL8|IFNG|APC|SP1|IRF1|CCL5|AKT1|CCL2|MAPK1|ATM|FYN
1701	0.010024	0.11754	11	216	in utero embryonic development	NCOR2|KAT2A|CEBPB|SP1|CUL3|KEAP1|AKT1|MAPK1|GRB2|EGFR|VEGFA
32570	0.010183	0.11878	5	24	response to progesterone stimulus	FOSL1|TGFB1|CCL2|FOS|RELA
2682	0.01069	0.12342	15	424	regulation of immune system process	STAT5B|JUN|SPI1|TGFB1|ETS1|TNF|RELA|VEGFA|NFKBIA|IFNG|APC|CCL5|CCL2|MAPK1|FYN
7346	0.010691	0.12342	10	174	regulation of mitotic cell cycle	STAT5B|TGFB1|HDAC3|APC|PLK1|CDK1|ATM|TNF|EGFR|SMARCA4
43330	0.011292	0.12968	4	11	response to exogenous dsRNA	NFKBIA|STAT1|MAPK1|MAPK3
34645	0.011527	0.13171	24	1033	cellular macromolecule biosynthetic process	CEBPB|TBP|CEBPD|EPO|STAT1|NFATC3|NFATC1|AHR|ETS1|SIRT1|EGFR|NFATC4|FOSL1|ETV7|CREB3|KAT2A|TADA2A|CREB1|NCOR1|ELF3|DDIT3|IRF1|NFE2L2|CREB5
51090	0.011738	0.13215	9	136	regulation of transcription factor activity	NFKBIA|HDAC2|TGFB1|DDIT3|TNF|SIRT1|RELA|SMARCA4|MAPK3
90046	0.011738	0.13215	9	136	regulation of transcription regulator activity	NFKBIA|HDAC2|TGFB1|DDIT3|TNF|SIRT1|RELA|SMARCA4|MAPK3
19538	0.011744	0.13215	42	2611	protein metabolic process	HDAC2|HDAC3|EPO|HDAC1|SRC|CUL3|CUL1|BAZ2A|BRCA1|TNF|MYSM1|EGFR|RELA|MAPK8|TRIM28|AKT1|CCL2|MAPK1|FYN|MAP2K6|MAPK3|CREBBP|TGFB1|YES1|FBXW7|STAT1|PRKCD|PLK1|SIRT1|RBX1|FGR|KAT2B|KAT2A|TADA2A|CREB1|IFNG|PIK3CA|APC|ERF|CDK1|ATM|SQSTM1
80134	0.012461	0.13905	13	319	regulation of response to stress	STAT5B|HDAC3|BRCA1|PTGS2|TNF|SIRT1|RELA|NFKBIA|NCOR1|APC|CCL5|AKT1|ATM
40017	0.012482	0.13905	9	137	positive regulation of locomotion	CREB3|TGFB1|IL8|APC|CCL2|MAPK1|PTGS2|EGFR|VEGFA
45429	0.012649	0.14021	5	25	positive regulation of nitric oxide biosynthetic process	IFNG|AKT1|PTGS2|TNF|EGFR
10627	0.01432	0.15794	13	323	regulation of intracellular protein kinase cascade	TGFB1|HDAC3|EPO|TNF|EGFR|RELA|NCOR1|IFNG|APC|REL|AKT1|GRB2|SQSTM1
6952	0.014436	0.15844	18	620	defense response	STAT5B|CEBPB|TGFB1|STAT3|NFATC3|FOS|TNF|RELA|NFATC4|FOSL1|FGR|IL8|ELF3|IFNG|CCL5|AKT1|CCL2|NOX1
32268	0.015235	0.1664	17	558	regulation of cellular protein metabolic process	JUN|HDAC2|TGFB1|EPO|PRKCD|PLK1|CUL1|BRCA1|TNF|EGFR|VEGFA|NFKBIA|IFNG|ERF|CDK1|AKT1|MAPK1
50806	0.015563	0.16914	5	26	positive regulation of synaptic transmission	IFNG|CCL2|PTGS2|TNF|EGFR
1775	0.016147	0.17464	12	275	cell activation	EGR1|STAT5B|TGFB1|IL8|APC|IRF1|PRKCD|ATM|FYN|TNF|EGFR|RELB
42176	0.017513	0.18759	7	74	regulation of protein catabolic process	IFNG|APC|EPO|PLK1|AKT1|TNF|RELA
6606	0.017513	0.18759	7	74	protein import into nucleus	NFKBIA|JUN|TGFB1|IFNG|AKT1|MAPK1|TNF
43434	0.020571	0.21929	10	187	response to peptide hormone stimulus	EGR1|STAT5B|KAT2B|SMARCC1|STAT1|CCL5|STAT3|AKT1|GRB2|RELA
42035	0.022956	0.24134	7	77	regulation of cytokine biosynthetic process	STAT5B|CEBPB|IFNG|IRF1|REL|TNF|RELA
51170	0.022956	0.24134	7	77	nuclear import	NFKBIA|JUN|TGFB1|IFNG|AKT1|MAPK1|TNF
45598	0.022964	0.24134	5	28	regulation of fat cell differentiation	NCOR2|TGFB1|AKT1|TNF|SIRT1
6807	0.023429	0.24507	37	2196	nitrogen compound metabolic process	ATF1|CEBPB|CEBPD|BAZ2A|AHR|BRCA1|RBPJ|BACH1|ETS1|AKT1|MAPK1|STAT5B|TGFB1|TBP|STAT1|NFATC3|NFATC1|FOS|SIRT1|RBX1|NFATC4|VEGFA|FOSL1|ETV7|CREB3|KAT2A|TADA2A|CREB1|NCOR1|ELF3|DDIT3|IRF1|ATM|NOX1|ATF4|NFE2L2|CREB5
32101	0.024895	0.25919	10	191	regulation of response to external stimulus	STAT5B|CREB3|TGFB1|IL8|APC|CCL5|CCL2|PTGS2|TNF|VEGFA
42108	0.027314	0.28305	6	51	positive regulation of cytokine biosynthetic process	STAT5B|IFNG|IRF1|REL|TNF|RELA
32768	0.027575	0.28312	5	29	regulation of monooxygenase activity	ATF1|IFNG|AKT1|TNF|EGFR
51971	0.027575	0.28312	5	29	positive regulation of transmission of nerve impulse	IFNG|CCL2|PTGS2|TNF|EGFR
40012	0.029192	0.29835	11	241	regulation of locomotion	CREB3|TGFB1|IL8|APC|AKT1|CCL2|MAPK1|RBPJ|PTGS2|EGFR|VEGFA
7167	0.030647	0.31179	13	346	enzyme linked receptor protein signaling pathway	STAT5B|SMARCC1|JUN|TGFB1|SRC|STAT3|FOS|EGFR|VEGFA|CREB1|AKT1|CCL2|GRB2
6793	0.036399	0.36575	22	949	phosphorus metabolic process	TGFB1|YES1|SRC|STAT1|PRKCD|PLK1|TNF|EGFR|FGR|MAPK8|CREB1|TRIM28|IFNG|PIK3CA|CDK1|AKT1|CCL2|MAPK1|ATM|FYN|MAP2K6|MAPK3
6796	0.036399	0.36575	22	949	phosphate metabolic process	TGFB1|YES1|SRC|STAT1|PRKCD|PLK1|TNF|EGFR|FGR|MAPK8|CREB1|TRIM28|IFNG|PIK3CA|CDK1|AKT1|CCL2|MAPK1|ATM|FYN|MAP2K6|MAPK3
23052	0.036444	0.36575	46	3130	signaling	ATF1|EPO|SRC|CREM|BRCA1|RBPJ|BACH1|ELK1|TNF|EGFR|RELA|ELK3|MAPK8|CCL5|AKT1|CCL2|MAPK1|FYN|CD36|MAP2K6|MAPK3|STAT5B|SMARCC1|CREBBP|JUN|TGFB1|STAT1|PRKCD|PLK1|STAT3|NFATC1|FOS|VEGFA|NFKBIA|CREB1|IL8|IFNG|PIK3CA|APC|DDIT3|CDK1|ATM|GRB2|SQSTM1|NOX1|NFE2L2
9987	0.036704	0.36671	95	9367	cellular process	ATF1|EPO|AHR|BRCA1|RBPJ|BACH1|ELK1|ETS1|TNF|MYSM1|ELK3|TRIM28|MYC|CREB3L2|AKT1|CD36|SKP2|SREBF1|SMARCC1|SMARCC2|TBP|FBXW7|PRKCD|FOS|SIRT1|RBX1|ETV6|ETV7|FGR|NCOR2|CREB3|KAT2B|KAT2A|CREB1|NCOR1|ELF3|IFNG|PIK3CA|DDIT3|IRF1|ERF|SQSTM1|ATF3|ATF4|CREB5|CEBPB|HDAC2|HDAC3|CEBPD|HDAC1|SRC|CUL3|CREM|CUL1|BAZ2A|PTGS2|EGFR|RELA|RELB|MAPK8|CCL5|CCL2|MAPK1|FYN|MAP2K6|MAPK3|GADD45GIP1|EGR1|NFE2|STAT5B|CREBBP|J…
71375	0.038133	0.37929	7	83	cellular response to peptide hormone stimulus	STAT5B|KAT2B|SMARCC1|STAT1|STAT3|AKT1|GRB2
45428	0.038965	0.38413	5	31	regulation of nitric oxide biosynthetic process	IFNG|AKT1|PTGS2|TNF|EGFR
31646	0.038965	0.38413	5	31	positive regulation of neurological system process	IFNG|CCL2|PTGS2|TNF|EGFR
3	0.041683	0.40912	20	809	reproduction	STAT5B|TGFB1|TBP|EPO|STAT3|CREM|AHR|FOS|PTGS2|SIRT1|EGFR|VEGFA|FOSL1|CREB3|CREB1|CREB3L4|SP1|AKT1|CCL2|ATM
32770	0.045591	0.44551	4	15	positive regulation of monooxygenase activity	ATF1|IFNG|AKT1|TNF
90189	0.046281	0.44832	3	5	regulation of branching involved in ureteric bud morphogenesis	ATF1|TGFB1|VEGFA
90190	0.046281	0.44832	3	5	positive regulation of branching involved in ureteric bud morphogenesis	ATF1|TGFB1|VEGFA
32870	0.047551	0.45812	9	161	cellular response to hormone stimulus	STAT5B|KAT2B|SMARCC1|TGFB1|STAT1|STAT3|AKT1|GRB2|FOS
1892	0.047703	0.45812	6	56	embryonic placenta development	CEBPB|SP1|AKT1|MAPK1|GRB2|EGFR
65008	0.051796	0.49529	29	1541	regulation of biological quality	EPO|HDAC1|SRC|PTGS2|TNF|MYC|CCL5|AKT1|CCL2|FYN|CD36|EGR1|NFE2|STAT5B|CREBBP|JUN|TGFB1|YES1|PRKCD|STAT3|VEGFA|NFKBIA|NCOR2|CREB1|IFNG|APC|SP1|DDIT3|NOX1
1890	0.052306	0.49802	7	87	placenta development	CEBPB|SP1|AKT1|MAPK1|GRB2|PTGS2|EGFR
32868	0.053803	0.5101	8	123	response to insulin stimulus	EGR1|KAT2B|SMARCC1|STAT1|CCL5|AKT1|GRB2|RELA
45599	0.060421	0.57042	4	16	negative regulation of fat cell differentiation	NCOR2|TGFB1|TNF|SIRT1
34976	0.062628	0.58875	5	34	response to endoplasmic reticulum stress	IFNG|DDIT3|CREB3L2|ATF4|NFE2L2
6917	0.065486	0.61303	12	315	induction of apoptosis	CEBPB|MAPK8|TGFB1|STAT1|CUL3|CUL1|MAPK1|ATM|BRCA1|ETS1|TNF|SQSTM1
12502	0.067628	0.63044	12	316	induction of programmed cell death	CEBPB|MAPK8|TGFB1|STAT1|CUL3|CUL1|MAPK1|ATM|BRCA1|ETS1|TNF|SQSTM1
71495	0.070613	0.65553	9	169	cellular response to endogenous stimulus	STAT5B|KAT2B|SMARCC1|TGFB1|STAT1|STAT3|AKT1|GRB2|FOS
30335	0.072313	0.66851	8	128	positive regulation of cell migration	CREB3|TGFB1|APC|CCL2|MAPK1|PTGS2|EGFR|VEGFA
7259	0.072611	0.66851	5	35	JAK-STAT cascade	STAT5B|IFNG|STAT1|STAT3|CCL2
8283	0.072976	0.6691	14	434	cell proliferation	CREBBP|CEBPB|TGFB1|PRKCD|PLK1|TNF|EGFR|NCOR2|KAT2A|MYC|IRF2|ERF|FYN|SKP2
30334	0.074438	0.6797	10	216	regulation of cell migration	CREB3|TGFB1|APC|AKT1|CCL2|MAPK1|RBPJ|PTGS2|EGFR|VEGFA
71222	0.078536	0.71419	4	17	cellular response to lipopolysaccharide	NFKBIA|STAT1|MAPK1|MAPK3
32880	0.081445	0.736	9	172	regulation of protein localization	NFKBIA|TGFB1|IFNG|APC|CDK1|AKT1|TNF|SIRT1|EGFR
34504	0.081595	0.736	7	93	protein localization in nucleus	NFKBIA|JUN|TGFB1|IFNG|AKT1|MAPK1|TNF
7169	0.08404	0.755	10	219	transmembrane receptor protein tyrosine kinase signaling pathway	STAT5B|SMARCC1|TGFB1|SRC|STAT3|AKT1|CCL2|GRB2|EGFR|VEGFA
30217	0.086942	0.77483	6	62	T cell differentiation	EGR1|STAT5B|TGFB1|APC|IRF1|RELB
50900	0.086942	0.77483	6	62	leukocyte migration	IL8|IFNG|CCL5|CCL2|TNF|VEGFA
48872	0.087595	0.77754	7	94	homeostasis of number of cells	STAT5B|TGFB1|IFNG|EPO|SP1|AKT1|VEGFA
30098	0.093957	0.8307	7	95	lymphocyte differentiation	EGR1|STAT5B|TGFB1|APC|IRF1|ATM|RELB
45862	0.09629	0.84796	5	37	positive regulation of proteolysis	HDAC2|IFNG|PLK1|AKT1|TNF
48609	0.10674	0.9326	15	512	reproductive process in a multicellular organism	STAT5B|TGFB1|TBP|CREM|PTGS2|SIRT1|EGFR|VEGFA|CREB3|CREB1|CREB3L4|SP1|AKT1|CCL2|ATM
32504	0.10674	0.9326	15	512	multicellular organism reproduction	STAT5B|TGFB1|TBP|CREM|PTGS2|SIRT1|EGFR|VEGFA|CREB3|CREB1|CREB3L4|SP1|AKT1|CCL2|ATM
51384	0.10784	0.93851	7	97	response to glucocorticoid stimulus	FOSL1|TGFB1|CCL5|CCL2|FOS|PTGS2|TNF
42306	0.11461	0.99361	6	65	regulation of protein import into nucleus	NFKBIA|TGFB1|CDK1|TNF|SIRT1|EGFR
[truncated: 62 more columns]

## Sheet: Supplementary table (S2)
Selected ontology file : bundle://134.0:1/data/GO_Biological_Process
Selected annotation file : bundle://134.0:1/data/H_sapiens_default
Discarded evidence codes :
Overrepresentation
Selected statistical test : Hypergeometric test
Selected correction : Benjamini & Hochberg False Discovery Rate (FDR) correction
Selected significance level : 0.05
Testing option : Use whole annotation as reference set
The selected cluster :
ATF1	SPI1	EPO	KEAP1	AHR	ETS1	TNF	BACH2	ETS2	YY1	TRIM28	MYB	IL12B	SKP2	MAP3K5	SMARCC1	SMARCC2	FBXW7	PRKCD	RBX1	DMTF1	DDIT3	ERG	ATF6	SQSTM1	ATF3	ATF4	EPAS1	CUL3	CREM	CUL1	HIF1A	KLK8	UBC	FGF20	MAP2K6	STAT5B	JUN	XBP1	JUND	TGFB1	YES1	PLK1	EIF2AK3	NFATC3	NFATC1	FOSL2	SMARCA4	FOSL1	IL4
No annotations were retrieved for the following entities:
NISO4	NICKEL	UBC	PGAM5	PLEKHO1
GO-ID	p-value	corr p-value	x	n	Description	Genes in test set
9891	4.8116e-30	1.1312e-26	49	730	positive regulation of biosynthetic process	ATF1|SPI1|EPO|AHR|RBPJ|ELK1|ETS1|TNF|MYSM1|ETS2|TRIM28|IL12B|IL10|SREBF1|SMARCC1|SMARCC2|TBP|FOS|BAZ1B|IL1A|CREB1|IFNG|DDIT3|IL1B|IRF1|ATF6|SQSTM1|ATF4|HDAC2|EPAS1|CEBPG|PTGS2|HIF1A|EGFR|STAT5B|JUN|TGFB1|NFATC3|SMARCA4|VEGFA|FOSL1|IL4|NFKBIA|IL6|IL5|CDK1|REL|NOX1|NFE2L2
10557	2.9539e-29	2.1613e-26	47	674	positive regulation of macromolecule biosynthetic process	ATF1|HDAC2|SPI1|EPO|EPAS1|CEBPG|AHR|RBPJ|ELK1|ETS1|TNF|HIF1A|MYSM1|ETS2|TRIM28|IL12B|IL10|STAT5B|SREBF1|SMARCC1|JUN|SMARCC2|TGFB1|TBP|NFATC3|FOS|BAZ1B|SMARCA4|VEGFA|FOSL1|IL4|NFKBIA|IL1A|IL6|IL5|CREB1|IFNG|DDIT3|IL1B|IRF1|CDK1|REL|ATF6|SQSTM1|NOX1|ATF4|NFE2L2
48518	3.4248e-29	2.1613e-26	73	2206	positive regulation of biological process	ATF1|SPI1|EPO|AHR|RBPJ|ELK1|ETS1|TNF|MYSM1|ETS2|TRIM28|CASP3|CASP1|IL12B|CD36|MAP3K5|IL10|SREBF1|SMARCC1|SMARCC2|TBP|FOS|BAZ1B|IL1A|CREB1|IFNG|DDIT3|IL1B|IRF1|ATF6|SQSTM1|ATF3|ATF4|HDAC2|EPAS1|CUL3|CEBPG|CUL1|PTGS2|HIF1A|EGFR|RELB|MAPK9|MAPK8|CCL5|FGF20|CCL2|FYN|MAP2K6|STAT5B|JUN|JUND|TGFB1|CDKN2A|STAT1|PLK1|EIF2AK3|NFATC3|FOSL2|SMARCA4|VEGFA|FOSL1|IL4|NFKBIA|IL6|IL5|IL8|APC|CDK1|REL|ATM|NOX1|NFE…
31328	3.6773e-29	2.1613e-26	48	719	positive regulation of cellular biosynthetic process	ATF1|HDAC2|SPI1|EPO|EPAS1|CEBPG|AHR|RBPJ|PTGS2|ELK1|ETS1|TNF|HIF1A|MYSM1|ETS2|EGFR|TRIM28|IL12B|IL10|STAT5B|SREBF1|SMARCC1|JUN|SMARCC2|TGFB1|TBP|NFATC3|FOS|BAZ1B|SMARCA4|VEGFA|FOSL1|IL4|NFKBIA|IL1A|IL6|IL5|CREB1|IFNG|DDIT3|IL1B|IRF1|CDK1|REL|ATF6|SQSTM1|ATF4|NFE2L2
10628	5.0458e-29	2.3725e-26	45	602	positive regulation of gene expression	ATF1|HDAC2|SPI1|EPO|EPAS1|AHR|RBPJ|ELK1|ETS1|TNF|HIF1A|MYSM1|ETS2|RELB|MAPK9|TRIM28|IL10|STAT5B|SREBF1|SMARCC1|JUN|SMARCC2|TGFB1|TBP|NFATC3|FOS|BAZ1B|SMARCA4|VEGFA|FOSL1|IL4|NFKBIA|IL6|IL5|CREB1|IFNG|DDIT3|IL1B|IRF1|CDK1|REL|ATF6|SQSTM1|ATF4|NFE2L2
48522	7.1602e-29	2.8056e-26	70	2002	positive regulation of cellular process	ATF1|SPI1|EPO|AHR|RBPJ|ELK1|ETS1|TNF|MYSM1|ETS2|TRIM28|CASP3|CASP1|IL12B|CD36|MAP3K5|IL10|SREBF1|SMARCC1|SMARCC2|TBP|FOS|BAZ1B|IL1A|CREB1|IFNG|DDIT3|IL1B|IRF1|ATF6|SQSTM1|ATF3|ATF4|HDAC2|EPAS1|CUL3|CEBPG|CUL1|PTGS2|HIF1A|EGFR|MAPK9|MAPK8|CCL5|FGF20|CCL2|MAP2K6|STAT5B|JUN|JUND|TGFB1|CDKN2A|STAT1|PLK1|EIF2AK3|NFATC3|FOSL2|SMARCA4|VEGFA|FOSL1|IL4|NFKBIA|IL6|IL5|APC|CDK1|REL|ATM|NOX1|NFE2L2
9893	1.0037e-28	3.371e-26	54	1017	positive regulation of metabolic process	ATF1|SPI1|EPO|AHR|RBPJ|ELK1|ETS1|TNF|MYSM1|ETS2|TRIM28|IL12B|IL10|SREBF1|SMARCC1|SMARCC2|TBP|FOS|BAZ1B|IL1A|CREB1|IFNG|DDIT3|IL1B|IRF1|ATF6|SQSTM1|ATF4|HDAC2|EPAS1|CEBPG|CUL1|PTGS2|HIF1A|EGFR|RELB|MAPK9|STAT5B|JUN|TGFB1|PLK1|NFATC3|SMARCA4|VEGFA|FOSL1|IL4|NFKBIA|IL6|IL5|APC|CDK1|REL|NOX1|NFE2L2
6355	1.2535e-28	3.6837e-26	67	1804	regulation of transcription, DNA-dependent	ATF1|SPI1|EPO|CHD6|AHR|RBPJ|ELK1|ETS1|TNF|MYSM1|BACH2|ETS2|YY1|TRIM28|MYB|IL10|BATF2|SREBF1|SMARCC1|BATF3|SMARCC2|TBP|BAZ1A|FOS|BAZ1B|ETV6|NCOR2|KAT2A|CREB1|NCOR1|DMTF1|IFNG|DDIT3|IL1B|IRF1|ERG|ATF6|SQSTM1|ATF3|ATF4|HDAC2|EPAS1|CEBPG|CREM|HIF1A|RELB|STAT5B|JUN|XBP1|JUND|TGFB1|STAT1|NFATC3|NFATC1|FOSL2|SMARCA4|BATF|VEGFA|FOSL1|IL4|NFKBIA|IL6|IL5|REL|FOSB|NFE2L1|NFE2L2
10604	3.3112e-28	8.6496e-26	52	940	positive regulation of macromolecule metabolic process	ATF1|SPI1|EPO|AHR|RBPJ|ELK1|ETS1|TNF|MYSM1|ETS2|TRIM28|IL12B|IL10|SREBF1|SMARCC1|SMARCC2|TBP|FOS|BAZ1B|IL1A|CREB1|IFNG|DDIT3|IL1B|IRF1|ATF6|SQSTM1|ATF4|HDAC2|EPAS1|CEBPG|CUL1|HIF1A|RELB|MAPK9|STAT5B|JUN|TGFB1|PLK1|NFATC3|SMARCA4|VEGFA|FOSL1|IL4|NFKBIA|IL6|IL5|APC|CDK1|REL|NOX1|NFE2L2
51173	5.2755e-28	1.2403e-25	46	676	positive regulation of nitrogen compound metabolic process	ATF1|HDAC2|SPI1|EPO|EPAS1|CEBPG|AHR|RBPJ|PTGS2|ELK1|ETS1|TNF|HIF1A|MYSM1|ETS2|EGFR|TRIM28|IL10|STAT5B|SREBF1|SMARCC1|JUN|SMARCC2|TGFB1|TBP|NFATC3|FOS|BAZ1B|SMARCA4|VEGFA|FOSL1|IL4|NFKBIA|IL6|IL5|CREB1|IFNG|DDIT3|IL1B|IRF1|CDK1|REL|ATF6|SQSTM1|ATF4|NFE2L2
51252	6.5845e-28	1.4073e-25	67	1853	regulation of RNA metabolic process	ATF1|SPI1|EPO|CHD6|AHR|RBPJ|ELK1|ETS1|TNF|MYSM1|BACH2|ETS2|YY1|TRIM28|MYB|IL10|BATF2|SREBF1|SMARCC1|BATF3|SMARCC2|TBP|BAZ1A|FOS|BAZ1B|ETV6|NCOR2|KAT2A|CREB1|NCOR1|DMTF1|IFNG|DDIT3|IL1B|IRF1|ERG|ATF6|SQSTM1|ATF3|ATF4|HDAC2|EPAS1|CEBPG|CREM|HIF1A|RELB|STAT5B|JUN|XBP1|JUND|TGFB1|STAT1|NFATC3|NFATC1|FOSL2|SMARCA4|BATF|VEGFA|FOSL1|IL4|NFKBIA|IL6|IL5|REL|FOSB|NFE2L1|NFE2L2
45941	2.881e-26	5.4497e-24	42	574	positive regulation of transcription	ATF1|HDAC2|SPI1|EPO|EPAS1|AHR|RBPJ|ELK1|ETS1|TNF|HIF1A|MYSM1|ETS2|TRIM28|IL10|STAT5B|SREBF1|SMARCC1|JUN|SMARCC2|TGFB1|TBP|NFATC3|FOS|BAZ1B|SMARCA4|VEGFA|FOSL1|IL4|NFKBIA|IL6|IL5|CREB1|IFNG|DDIT3|IL1B|IRF1|REL|ATF6|SQSTM1|ATF4|NFE2L2
45935	3.0135e-26	5.4497e-24	44	655	positive regulation of nucleobase, nucleoside, nucleotide and nucleic acid metabolic process	ATF1|HDAC2|SPI1|EPO|EPAS1|CEBPG|AHR|RBPJ|ELK1|ETS1|TNF|HIF1A|MYSM1|ETS2|TRIM28|IL10|STAT5B|SREBF1|SMARCC1|JUN|SMARCC2|TGFB1|TBP|NFATC3|FOS|BAZ1B|SMARCA4|VEGFA|FOSL1|IL4|NFKBIA|IL6|IL5|CREB1|IFNG|DDIT3|IL1B|IRF1|CDK1|REL|ATF6|SQSTM1|ATF4|NFE2L2
60255	3.999e-26	6.7155e-24	83	3373	regulation of macromolecule metabolic process	ATF1|SPI1|EPO|CHD6|AHR|RBPJ|ELK1|ETS1|TNF|MYSM1|BACH2|ETS2|YY1|TRIM28|MYB|IL12B|MAP3K5|IL10|BATF2|SREBF1|SMARCC1|BATF3|SMARCC2|TBP|PARP1|FBXW7|PRKCD|BAZ1A|FOS|BAZ1B|ETV6|NCOR2|IL1A|KAT2A|CREB1|NCOR1|DMTF1|IFNG|DDIT3|IL1B|IRF1|ERG|ATF6|SQSTM1|ATF3|ATF4|HDAC2|EPAS1|CEBPG|CREM|CUL1|HIF1A|EGFR|RELB|MAPK9|STAT5B|JUN|XBP1|JUND|TGFB1|CDKN2A|STAT1|PLK1|EIF2AK3|NFATC3|NFATC1|FOSL2|SMARCA4|BATF|VEGFA|FOSL1…
31325	1.8568e-25	2.9102e-23	50	965	positive regulation of cellular metabolic process	ATF1|SPI1|EPO|AHR|RBPJ|ELK1|ETS1|TNF|MYSM1|ETS2|TRIM28|IL12B|IL10|SREBF1|SMARCC1|SMARCC2|TBP|FOS|BAZ1B|IL1A|CREB1|IFNG|DDIT3|IL1B|IRF1|ATF6|SQSTM1|ATF4|HDAC2|EPAS1|CEBPG|CUL1|PTGS2|HIF1A|EGFR|STAT5B|JUN|TGFB1|PLK1|NFATC3|SMARCA4|VEGFA|FOSL1|IL4|NFKBIA|IL6|IL5|CDK1|REL|NFE2L2
45893	4.7526e-25	6.9833e-23	39	499	positive regulation of transcription, DNA-dependent	ATF1|HDAC2|SPI1|EPO|EPAS1|AHR|ELK1|ETS1|TNF|HIF1A|MYSM1|ETS2|TRIM28|IL10|STAT5B|SREBF1|SMARCC1|JUN|SMARCC2|TGFB1|NFATC3|FOS|BAZ1B|SMARCA4|VEGFA|FOSL1|IL4|NFKBIA|IL6|IL5|CREB1|IFNG|IL1B|IRF1|REL|ATF6|SQSTM1|ATF4|NFE2L2
51254	7.485e-25	1.0351e-22	39	505	positive regulation of RNA metabolic process	ATF1|HDAC2|SPI1|EPO|EPAS1|AHR|ELK1|ETS1|TNF|HIF1A|MYSM1|ETS2|TRIM28|IL10|STAT5B|SREBF1|SMARCC1|JUN|SMARCC2|TGFB1|NFATC3|FOS|BAZ1B|SMARCA4|VEGFA|FOSL1|IL4|NFKBIA|IL6|IL5|CREB1|IFNG|IL1B|IRF1|REL|ATF6|SQSTM1|ATF4|NFE2L2
9889	1.5116e-24	1.9743e-22	78	3042	regulation of biosynthetic process	ATF1|SPI1|EPO|CHD6|AHR|RBPJ|ELK1|ETS1|TNF|MYSM1|BACH2|ETS2|YY1|TRIM28|MYB|IL12B|IL10|BATF2|SREBF1|SMARCC1|BATF3|SMARCC2|TBP|PARP1|FBXW7|BAZ1A|FOS|BAZ1B|ETV6|NCOR2|IL1A|KAT2A|CREB1|NCOR1|DMTF1|IFNG|DDIT3|IL1B|IRF1|ERG|ATF6|SQSTM1|ATF3|ATF4|HDAC2|EPAS1|CEBPG|CREM|PTGS2|HIF1A|EGFR|RELB|STAT5B|JUN|XBP1|JUND|TGFB1|CDKN2A|STAT1|EIF2AK3|NFATC3|NFATC1|FOSL2|SMARCA4|BATF|VEGFA|FOSL1|IL4|NFKBIA|IL6|IL5|CDK…
50794	1.807e-24	2.236e-22	103	6219	regulation of cellular process	ATF1|SPI1|EPO|KEAP1|AHR|RBPJ|ELK1|ETS1|TNF|BACH2|ETS2|YY1|TRIM28|MYB|IL12B|MAP3K5|SMARCC1|SMARCC2|FBXW7|PRKCD|DMTF1|DDIT3|ERG|ATF6|SQSTM1|ATF3|ATF4|EPAS1|CUL3|CREM|CUL1|HIF1A|KLK8|FGF20|MAP2K6|STAT5B|JUN|XBP1|JUND|TGFB1|PLK1|EIF2AK3|NFATC3|NFATC1|FOSL2|SMARCA4|FOSL1|IL4|NFKBIA|IL6|IL5|IL8|CDK1|REL|ATM|GRB2|NFE2L1|NOX1|NFE2L2|CHD6|MYSM1|CASP3|CASP1|CD36|IL10|BATF2|SREBF1|BATF3|TBP|PARP1|BAZ1A|FOS|…
10556	2.3199e-24	2.727e-22	76	2874	regulation of macromolecule biosynthetic process	ATF1|SPI1|EPO|CHD6|AHR|RBPJ|ELK1|ETS1|TNF|MYSM1|BACH2|ETS2|YY1|TRIM28|MYB|IL12B|IL10|BATF2|SREBF1|SMARCC1|BATF3|SMARCC2|TBP|PARP1|FBXW7|BAZ1A|FOS|BAZ1B|ETV6|NCOR2|IL1A|KAT2A|CREB1|NCOR1|DMTF1|IFNG|DDIT3|IL1B|IRF1|ERG|ATF6|SQSTM1|ATF3|ATF4|HDAC2|EPAS1|CEBPG|CREM|HIF1A|RELB|STAT5B|JUN|XBP1|JUND|TGFB1|CDKN2A|STAT1|EIF2AK3|NFATC3|NFATC1|FOSL2|SMARCA4|BATF|VEGFA|FOSL1|IL4|NFKBIA|IL6|IL5|CDK1|REL|FOSB|…
19222	4.2407e-24	4.7475e-22	86	3915	regulation of metabolic process	ATF1|SPI1|EPO|CHD6|AHR|RBPJ|ELK1|ETS1|TNF|MYSM1|BACH2|ETS2|YY1|TRIM28|CASP3|MYB|IL12B|MAP3K5|IL10|BATF2|SREBF1|SMARCC1|BATF3|SMARCC2|TBP|PARP1|FBXW7|PRKCD|BAZ1A|FOS|BAZ1B|ETV6|NCOR2|IL1A|KAT2A|CREB1|NCOR1|DMTF1|IFNG|DDIT3|IL1B|IRF1|ERG|ATF6|SQSTM1|ATF3|ATF4|HDAC2|EPAS1|CEBPG|CREM|CUL1|PTGS2|HIF1A|EGFR|RELB|MAPK9|MAP2K6|STAT5B|JUN|XBP1|JUND|TGFB1|CDKN2A|STAT1|PLK1|EIF2AK3|NFATC3|NFATC1|FOSL2|SMARC…
31326	7.6425e-24	8.167e-22	77	3018	regulation of cellular biosynthetic process	ATF1|SPI1|EPO|CHD6|AHR|RBPJ|ELK1|ETS1|TNF|MYSM1|BACH2|ETS2|YY1|TRIM28|MYB|IL12B|IL10|BATF2|SREBF1|SMARCC1|BATF3|SMARCC2|TBP|PARP1|FBXW7|BAZ1A|FOS|BAZ1B|ETV6|NCOR2|IL1A|KAT2A|CREB1|NCOR1|DMTF1|IFNG|DDIT3|IL1B|IRF1|ERG|ATF6|SQSTM1|ATF3|ATF4|HDAC2|EPAS1|CEBPG|CREM|PTGS2|HIF1A|EGFR|RELB|STAT5B|JUN|XBP1|JUND|TGFB1|CDKN2A|STAT1|EIF2AK3|NFATC3|NFATC1|FOSL2|SMARCA4|BATF|VEGFA|FOSL1|IL4|NFKBIA|IL6|IL5|CDK…
31323	8.9219e-24	9.1197e-22	84	3732	regulation of cellular metabolic process	ATF1|SPI1|EPO|CHD6|AHR|RBPJ|ELK1|ETS1|TNF|MYSM1|BACH2|ETS2|YY1|TRIM28|CASP3|MYB|IL12B|MAP3K5|IL10|BATF2|SREBF1|SMARCC1|BATF3|SMARCC2|TBP|PARP1|FBXW7|PRKCD|BAZ1A|FOS|BAZ1B|ETV6|NCOR2|IL1A|KAT2A|CREB1|NCOR1|DMTF1|IFNG|DDIT3|IL1B|IRF1|ERG|ATF6|SQSTM1|ATF3|ATF4|HDAC2|EPAS1|CEBPG|CREM|CUL1|PTGS2|HIF1A|EGFR|RELB|MAP2K6|STAT5B|JUN|XBP1|JUND|TGFB1|CDKN2A|STAT1|PLK1|EIF2AK3|NFATC3|NFATC1|FOSL2|SMARCA4|BAT…
50789	1.7727e-23	1.7365e-21	104	6549	regulation of biological process	ATF1|SPI1|EPO|KEAP1|AHR|RBPJ|ELK1|ETS1|TNF|BACH2|ETS2|YY1|TRIM28|MYB|IL12B|MAP3K5|SMARCC1|SMARCC2|FBXW7|PRKCD|DMTF1|DDIT3|ERG|ATF6|SQSTM1|ATF3|ATF4|EPAS1|CUL3|CREM|CUL1|HIF1A|KLK8|FGF20|MAP2K6|STAT5B|JUN|XBP1|JUND|TGFB1|PLK1|EIF2AK3|NFATC3|NFATC1|FOSL2|SMARCA4|FOSL1|IL4|NFKBIA|IL6|IL5|IL8|CDK1|REL|ATM|GRB2|NFE2L1|NOX1|NFE2L2|CHD6|MYSM1|CASP3|CASP1|CD36|IL10|BATF2|SREBF1|BATF3|TBP|PARP1|BAZ1A|FOS|…
80090	1.4161e-22	1.3317e-20	81	3550	regulation of primary metabolic process	ATF1|SPI1|EPO|CHD6|AHR|RBPJ|ELK1|ETS1|TNF|MYSM1|BACH2|ETS2|YY1|TRIM28|MYB|MAP3K5|IL10|BATF2|SREBF1|SMARCC1|BATF3|SMARCC2|TBP|PARP1|FBXW7|PRKCD|BAZ1A|FOS|BAZ1B|ETV6|NCOR2|IL1A|KAT2A|CREB1|NCOR1|DMTF1|IFNG|DDIT3|IL1B|IRF1|ERG|ATF6|SQSTM1|ATF3|ATF4|HDAC2|EPAS1|CEBPG|CREM|CUL1|PTGS2|HIF1A|EGFR|RELB|STAT5B|JUN|XBP1|JUND|TGFB1|CDKN2A|STAT1|PLK1|EIF2AK3|NFATC3|NFATC1|FOSL2|SMARCA4|BATF|VEGFA|FOSL1|IL4|N…
65007	3.2279e-22	2.9188e-20	105	6938	biological regulation	ATF1|SPI1|EPO|KEAP1|AHR|RBPJ|ELK1|ETS1|TNF|BACH2|ETS2|YY1|TRIM28|MYB|IL12B|MAP3K5|SMARCC1|SMARCC2|FBXW7|PRKCD|DMTF1|DDIT3|ERG|ATF6|SQSTM1|ATF3|ATF4|EPAS1|CUL3|CREM|CUL1|HIF1A|KLK8|FGF20|MAP2K6|STAT5B|JUN|XBP1|JUND|TGFB1|YES1|PLK1|EIF2AK3|NFATC3|NFATC1|FOSL2|SMARCA4|FOSL1|IL4|NFKBIA|IL6|IL5|IL8|CDK1|REL|ATM|GRB2|NFE2L1|NOX1|NFE2L2|CHD6|MYSM1|CASP3|CASP1|CD36|IL10|BATF2|SREBF1|BATF3|TBP|PARP1|BAZ1A…
10468	5.2764e-22	4.5944e-20	74	2925	regulation of gene expression	ATF1|SPI1|EPO|CHD6|AHR|RBPJ|ELK1|ETS1|TNF|MYSM1|BACH2|ETS2|YY1|TRIM28|MYB|IL10|BATF2|SREBF1|SMARCC1|BATF3|SMARCC2|TBP|PARP1|PRKCD|BAZ1A|FOS|BAZ1B|ETV6|NCOR2|KAT2A|CREB1|NCOR1|DMTF1|IFNG|DDIT3|IL1B|IRF1|ERG|ATF6|SQSTM1|ATF3|ATF4|HDAC2|EPAS1|CEBPG|CREM|HIF1A|RELB|MAPK9|STAT5B|JUN|XBP1|JUND|TGFB1|CDKN2A|STAT1|EIF2AK3|NFATC3|NFATC1|FOSL2|SMARCA4|BATF|VEGFA|FOSL1|IL4|NFKBIA|IL6|IL5|CDK1|REL|FOSB|NFE2L…
51171	7.9575e-22	6.6814e-20	75	3037	regulation of nitrogen compound metabolic process	ATF1|SPI1|EPO|CHD6|AHR|RBPJ|ELK1|ETS1|TNF|MYSM1|BACH2|ETS2|YY1|TRIM28|MYB|IL10|BATF2|SREBF1|SMARCC1|BATF3|SMARCC2|TBP|PARP1|FBXW7|BAZ1A|FOS|BAZ1B|ETV6|NCOR2|KAT2A|CREB1|NCOR1|DMTF1|IFNG|DDIT3|IL1B|IRF1|ERG|ATF6|SQSTM1|ATF3|ATF4|HDAC2|EPAS1|CEBPG|CREM|PTGS2|HIF1A|EGFR|RELB|STAT5B|JUN|XBP1|JUND|TGFB1|CDKN2A|STAT1|NFATC3|NFATC1|FOSL2|SMARCA4|BATF|VEGFA|FOSL1|IL4|NFKBIA|IL6|IL5|APC|CDK1|REL|FOSB|NFE2…
45449	1.7658e-21	1.4315e-19	70	2619	regulation of transcription	ATF1|SPI1|EPO|CHD6|AHR|RBPJ|ELK1|ETS1|TNF|MYSM1|BACH2|ETS2|YY1|TRIM28|MYB|IL10|BATF2|SREBF1|SMARCC1|BATF3|SMARCC2|TBP|PARP1|BAZ1A|FOS|BAZ1B|ETV6|NCOR2|KAT2A|CREB1|NCOR1|DMTF1|IFNG|DDIT3|IL1B|IRF1|ERG|ATF6|SQSTM1|ATF3|ATF4|HDAC2|EPAS1|CEBPG|CREM|HIF1A|RELB|STAT5B|JUN|XBP1|JUND|TGFB1|CDKN2A|STAT1|NFATC3|NFATC1|FOSL2|SMARCA4|BATF|VEGFA|FOSL1|IL4|NFKBIA|IL6|IL5|REL|FOSB|NFE2L1|TRIM33|NFE2L2
42981	1.8494e-19	1.4406e-17	42	851	regulation of apoptosis	ATF1|EPO|CUL3|CEBPG|CUL1|RBPJ|PTGS2|ELK1|ETS1|TNF|EGFR|MAPK9|MAPK8|CASP3|CASP1|IL12B|CCL2|MAP3K5|MAP2K6|IL10|STAT5B|JUN|TGFB1|CDKN2A|STAT1|EIF2AK3|VEGFA|FOSL1|IL4|NFKBIA|IL1A|IL6|KAT2A|CREB1|IFNG|PIK3CA|APC|DDIT3|IL1B|CDK1|ATM|SQSTM1
19219	1.8996e-19	1.4406e-17	72	3011	regulation of nucleobase, nucleoside, nucleotide and nucleic acid metabolic process	ATF1|SPI1|EPO|CHD6|AHR|RBPJ|ELK1|ETS1|TNF|MYSM1|BACH2|ETS2|YY1|TRIM28|MYB|IL10|BATF2|SREBF1|SMARCC1|BATF3|SMARCC2|TBP|PARP1|FBXW7|BAZ1A|FOS|BAZ1B|ETV6|NCOR2|KAT2A|CREB1|NCOR1|DMTF1|IFNG|DDIT3|IL1B|IRF1|ERG|ATF6|SQSTM1|ATF3|ATF4|HDAC2|EPAS1|CEBPG|CREM|HIF1A|RELB|STAT5B|JUN|XBP1|JUND|TGFB1|CDKN2A|STAT1|NFATC3|NFATC1|FOSL2|SMARCA4|BATF|VEGFA|FOSL1|IL4|NFKBIA|IL6|IL5|CDK1|REL|FOSB|NFE2L1|TRIM33|NFE2L2
43067	2.6579e-19	1.9527e-17	42	859	regulation of programmed cell death	ATF1|EPO|CUL3|CEBPG|CUL1|RBPJ|PTGS2|ELK1|ETS1|TNF|EGFR|MAPK9|MAPK8|CASP3|CASP1|IL12B|CCL2|MAP3K5|MAP2K6|IL10|STAT5B|JUN|TGFB1|CDKN2A|STAT1|EIF2AK3|VEGFA|FOSL1|IL4|NFKBIA|IL1A|IL6|KAT2A|CREB1|IFNG|PIK3CA|APC|DDIT3|IL1B|CDK1|ATM|SQSTM1
10941	3.639e-19	2.5925e-17	42	866	regulation of cell death	ATF1|EPO|CUL3|CEBPG|CUL1|RBPJ|PTGS2|ELK1|ETS1|TNF|EGFR|MAPK9|MAPK8|CASP3|CASP1|IL12B|CCL2|MAP3K5|MAP2K6|IL10|STAT5B|JUN|TGFB1|CDKN2A|STAT1|EIF2AK3|VEGFA|FOSL1|IL4|NFKBIA|IL1A|IL6|KAT2A|CREB1|IFNG|PIK3CA|APC|DDIT3|IL1B|CDK1|ATM|SQSTM1
6950	1.4463e-18	9.726e-17	56	1772	response to stress	EPO|AHR|TNF|CASP3|CASP1|CD36|MAP3K5|IL10|SREBF1|PARP1|MMP2|FOS|BAZ1B|RBX1|FGR|IL1A|IFNG|DDIT3|IL1B|ATF6|SQSTM1|ATF4|HDAC2|EPAS1|CEBPG|PTGS2|HIF1A|KLK8|EGFR|MAPK9|MAPK8|CCL5|CCL4|CCL2|MAP2K6|STAT5B|JUN|TGFB1|CCL20|STAT1|PLK1|EIF2AK3|NFATC3|KLF2|VEGFA|FOSL1|IL4|IL6|IL5|IL8|APC|CDK1|ATM|NFE2L1|NOX1|NFE2L2
6357	1.4479e-18	9.726e-17	39	746	regulation of transcription from RNA polymerase II promoter	ATF1|HDAC2|SPI1|EPO|EPAS1|CEBPG|AHR|ELK1|ETS1|TNF|HIF1A|YY1|TRIM28|STAT5B|SREBF1|SMARCC1|JUN|SMARCC2|JUND|TGFB1|NFATC3|FOS|FOSL2|SMARCA4|VEGFA|FOSL1|IL4|NFKBIA|NCOR2|IL6|KAT2A|CREB1|NCOR1|IL1B|IRF1|FOSB|ATF6|SQSTM1|ATF4
51716	5.4551e-17	3.5625e-15	42	987	cellular response to stimulus	HDAC2|EPO|EPAS1|HIF1A|MAPK9|MAPK8|CASP3|CCL5|CCL2|MAP3K5|MAP2K6|IL10|STAT5B|SREBF1|SMARCC1|JUN|TGFB1|PARP1|STAT1|PLK1|EIF2AK3|FOS|BAZ1B|KLF2|RBX1|VEGFA|FOSL1|NFKBIA|IL1A|IL6|IL8|IFNG|APC|DDIT3|IL1B|CDK1|ATM|GRB2|ATF6|SQSTM1|ATF4|NFE2L2
42221	1.7282e-15	1.0981e-13	48	1464	response to chemical stimulus	ATF1|HDAC2|EPO|EPAS1|AHR|PTGS2|ETS1|TNF|HIF1A|EGFR|MAPK9|MAPK8|CASP3|CCL5|CCL4|CASP1|CCL2|FYN|MAP2K6|IL10|STAT5B|SMARCC1|JUN|TGFB1|PARP1|CCL20|STAT1|MMP2|EIF2AK3|FOS|KLF2|VEGFA|FOSL1|IL4|NFKBIA|IL1A|IL6|CREB1|IL8|IFNG|APC|DDIT3|IL1B|CDK1|GRB2|ATF6|CCL27|NFE2L2
51239	7.4276e-15	4.5953e-13	41	1065	regulation of multicellular organismal process	ATF1|HDAC2|SPI1|EPO|EPAS1|CEBPG|KEAP1|PTGS2|ETS1|TNF|HIF1A|KLK8|EGFR|CCL5|CASP1|IL12B|CCL2|IL10|STAT5B|JUN|JUND|TGFB1|CDKN2A|EIF2AK3|KLF2|VEGFA|IL4|NFKBIA|IL1A|IL6|IL5|CREB1|IFNG|PIK3CA|APC|IL1B|IRF1|CDK1|REL|NOX1|NFE2L2
45944	1.1774e-14	7.0977e-13	27	387	positive regulation of transcription from RNA polymerase II promoter	ATF1|HDAC2|EPAS1|AHR|ELK1|ETS1|TNF|HIF1A|STAT5B|SREBF1|SMARCC1|JUN|TGFB1|NFATC3|FOS|SMARCA4|VEGFA|FOSL1|IL4|NFKBIA|IL6|CREB1|IL1B|IRF1|ATF6|SQSTM1|ATF4
32583	1.0361e-13	6.0896e-12	21	212	regulation of gene-specific transcription	ATF1|IL10|HDAC2|SPI1|TGFB1|EPO|ETS1|TNF|HIF1A|SMARCA4|YY1|IL4|NFKBIA|NCOR2|IL6|IL5|CREB1|NCOR1|TRIM28|IL1B|ATF6
43193	1.6535e-13	9.4812e-12	18	137	positive regulation of gene-specific transcription	ATF1|IL10|HDAC2|SPI1|TGFB1|EPO|ETS1|TNF|HIF1A|SMARCA4|IL4|NFKBIA|IL6|IL5|CREB1|TRIM28|IL1B|ATF6
50793	6.1303e-13	3.4315e-11	34	790	regulation of developmental process	ATF1|HDAC2|SPI1|EPO|KEAP1|PTGS2|ETS1|TNF|HIF1A|KLK8|MAPK9|CCL5|CCL2|FYN|CD36|IL10|STAT5B|JUN|JUND|TGFB1|CDKN2A|EIF2AK3|VEGFA|IL4|NFKBIA|NCOR2|IL1A|IL6|IL5|IFNG|APC|IL1B|CDK1|NFE2L2
42127	6.6686e-13	3.646e-11	35	847	regulation of cell proliferation	HDAC2|EPO|CUL3|CUL1|RBPJ|PTGS2|ETS1|TNF|HIF1A|EGFR|CASP3|FGF20|IL12B|CCL2|IL10|STAT5B|JUN|TGFB1|CDKN2A|STAT1|FOSL2|VEGFA|FOSL1|IL4|NFKBIA|IL1A|IL6|IL5|IL8|IFNG|APC|IL1B|CDK1|ATF3|NOX1
50896	2.5755e-12	1.3762e-10	69	3631	response to stimulus	ATF1|EPO|AHR|ETS1|TNF|CASP3|CASP1|IL12B|CD36|MAP3K5|IL10|SREBF1|SMARCC1|PARP1|MMP2|PRKCD|FOS|BAZ1B|RBX1|FGR|IL1A|CREB1|IFNG|DDIT3|IL1B|ATF6|SQSTM1|ATF4|HDAC2|EPAS1|CEBPG|PTGS2|HIF1A|KLK8|EGFR|RELB|MAPK9|MAPK8|CCL5|CCL4|CCL2|FYN|MAP2K6|STAT5B|JUN|XBP1|TGFB1|CCL20|STAT1|PLK1|EIF2AK3|NFATC3|KLF2|VEGFA|FOSL1|IL4|NFKBIA|IL6|IL5|IL8|APC|CDK1|FOSB|ATM|GRB2|NFE2L1|NOX1|CCL27|NFE2L2
32502	2.8631e-12	1.4958e-10	65	3233	developmental process	ATF1|EPO|CHD6|KEAP1|AHR|RBPJ|TNF|ETS2|YY1|TRIM28|CASP3|CASP1|IL12B|IL10|SMARCC1|SMARCC2|MMP2|PRKCD|FOS|BAZ1B|ETV6|NCOR2|KAT2A|CREB1|IFNG|DDIT3|IL1B|IRF1|ERG|SQSTM1|HDAC2|EPAS1|CUL3|CEBPG|CREM|CUL1|PTGS2|HIF1A|KLK8|EGFR|RELB|MAPK8|CCL5|FGF20|CCL2|FYN|STAT5B|JUN|JUND|TGFB1|CDKN2A|EIF2AK3|NFATC3|SMARCA4|VEGFA|IL4|IL6|IL8|APC|CDK1|FOSB|ATM|GRB2|NFE2L1|NOX1
48523	3.7476e-12	1.9154e-10	49	1843	negative regulation of cellular process	ATF1|SPI1|EPO|RBPJ|ELK1|ETS1|TNF|YY1|TRIM28|CASP3|IL12B|IL10|SMARCC2|FBXW7|PRKCD|NCOR2|IL1A|NCOR1|IFNG|PIK3CA|DDIT3|IL1B|SQSTM1|HDAC2|CUL3|CUL1|PTGS2|KLK8|EGFR|MAPK8|CCL2|MAP2K6|STAT5B|JUN|TGFB1|CDKN2A|EIF2AK3|SMARCA4|VEGFA|FOSL1|IL4|NFKBIA|IL6|IL8|APC|CDK1|FOSB|ATM|TRIM33
48660	4.4575e-12	2.2297e-10	12	44	regulation of smooth muscle cell proliferation	STAT5B|JUN|IL6|IFNG|STAT1|IL12B|RBPJ|PTGS2|TNF|NOX1|EGFR|VEGFA
51726	4.5687e-12	2.2377e-10	26	446	regulation of cell cycle	HDAC2|CUL3|CUL1|PTGS2|ETS1|TNF|EGFR|CASP3|IL12B|MAP2K6|STAT5B|JUN|TGFB1|FBXW7|CDKN2A|PLK1|SMARCA4|FOSL1|IL1A|IL8|IFNG|APC|DDIT3|IL1B|CDK1|ATM
48519	5.5488e-12	2.6623e-10	51	2019	negative regulation of biological process	ATF1|SPI1|EPO|RBPJ|ELK1|ETS1|TNF|YY1|TRIM28|CASP3|IL12B|IL10|SMARCC2|FBXW7|PRKCD|NCOR2|IL1A|NCOR1|IFNG|PIK3CA|DDIT3|IL1B|SQSTM1|HDAC2|CUL3|CUL1|PTGS2|KLK8|EGFR|MAPK8|CCL5|CCL2|MAP2K6|STAT5B|JUN|TGFB1|CDKN2A|EIF2AK3|KLF2|SMARCA4|VEGFA|FOSL1|IL4|NFKBIA|IL6|IL8|APC|CDK1|FOSB|ATM|TRIM33
8284	8.6589e-12	4.0714e-10	26	458	positive regulation of cell proliferation	HDAC2|EPO|CUL3|RBPJ|PTGS2|TNF|HIF1A|EGFR|FGF20|IL12B|CCL2|STAT5B|JUN|TGFB1|STAT1|FOSL2|VEGFA|FOSL1|IL4|IL6|IL5|IFNG|IL1B|CDK1|ATF3|NOX1
1817	1.128e-11	5.1998e-10	19	202	regulation of cytokine production	IL10|STAT5B|TGFB1|CEBPG|PTGS2|TNF|HIF1A|KLF2|IL1A|IL6|CREB1|IFNG|IL1B|IRF1|REL|CASP1|IL12B|CCL2|NOX1
70887	3.6383e-11	1.6371e-09	24	399	cellular response to chemical stimulus	IL10|STAT5B|SMARCC1|TGFB1|PARP1|EPO|EPAS1|STAT1|EIF2AK3|FOS|HIF1A|KLF2|VEGFA|IL6|IL8|IFNG|DDIT3|IL1B|CCL5|CDK1|CCL2|GRB2|ATF6|NFE2L2
43065	3.6906e-11	1.6371e-09	25	442	positive regulation of apoptosis	CUL3|CEBPG|CUL1|PTGS2|ETS1|TNF|MAPK9|MAPK8|CASP3|CASP1|IL12B|MAP3K5|MAP2K6|IL10|JUN|TGFB1|CDKN2A|STAT1|FOSL1|IFNG|APC|DDIT3|IL1B|ATM|SQSTM1
43068	4.3137e-11	1.878e-09	25	445	positive regulation of programmed cell death	CUL3|CEBPG|CUL1|PTGS2|ETS1|TNF|MAPK9|MAPK8|CASP3|CASP1|IL12B|MAP3K5|MAP2K6|IL10|JUN|TGFB1|CDKN2A|STAT1|FOSL1|IFNG|APC|DDIT3|IL1B|ATM|SQSTM1
9607	4.7832e-11	2.0446e-09	25	447	response to biotic stimulus	EPO|PTGS2|TNF|CCL5|CCL4|CASP1|CCL2|IL10|STAT5B|JUN|TGFB1|CCL20|STAT1|EIF2AK3|FOS|FOSL1|NFKBIA|FGR|IL1A|IL6|IFNG|DDIT3|IL1B|ATF6|NFE2L2
10942	5.3011e-11	2.2255e-09	25	449	positive regulation of cell death	CUL3|CEBPG|CUL1|PTGS2|ETS1|TNF|MAPK9|MAPK8|CASP3|CASP1|IL12B|MAP3K5|MAP2K6|IL10|JUN|TGFB1|CDKN2A|STAT1|FOSL1|IFNG|APC|DDIT3|IL1B|ATM|SQSTM1
10033	7.5779e-11	3.1256e-09	33	869	response to organic substance	ATF1|HDAC2|EPO|PTGS2|TNF|EGFR|CASP3|CCL5|CASP1|CCL2|FYN|IL10|STAT5B|SMARCC1|JUN|TGFB1|PARP1|STAT1|EIF2AK3|FOS|KLF2|FOSL1|NFKBIA|IL1A|IL6|CREB1|IFNG|DDIT3|IL1B|CDK1|GRB2|ATF6|NFE2L2
48661	9.2984e-11	3.7691e-09	10	29	positive regulation of smooth muscle cell proliferation	STAT5B|JUN|IL6|STAT1|RBPJ|PTGS2|TNF|NOX1|EGFR|VEGFA
33554	1.7969e-10	7.1602e-09	28	619	cellular response to stress	HDAC2|EPO|EPAS1|HIF1A|MAPK9|MAPK8|CASP3|MAP3K5|MAP2K6|SREBF1|JUN|PARP1|PLK1|EIF2AK3|FOS|BAZ1B|KLF2|RBX1|IL1A|IFNG|APC|DDIT3|CDK1|ATM|ATF6|SQSTM1|ATF4|NFE2L2
48583	2.1298e-10	8.3452e-09	26	524	regulation of response to stimulus	CEBPG|PTGS2|TNF|KLK8|CCL5|CASP1|IL12B|CCL2|FYN|MAP3K5|IL10|STAT5B|TGFB1|CDKN2A|PRKCD|VEGFA|IL4|NFKBIA|IL1A|IL6|NCOR1|IL8|IFNG|APC|IL1B|ATM
51240	3.2987e-10	1.2714e-08	20	278	positive regulation of multicellular organismal process	ATF1|STAT5B|HDAC2|TGFB1|PTGS2|TNF|HIF1A|EGFR|VEGFA|IL1A|IL6|CREB1|IFNG|IL1B|CCL5|CDK1|CASP1|IL12B|CCL2|NOX1
42493	8.7852e-10	3.3313e-08	19	256	response to drug	IL10|JUN|HDAC2|TGFB1|STAT1|FOS|PTGS2|TNF|FOSL1|CREB1|IFNG|APC|DDIT3|IL1B|CCL5|CDK1|CASP1|CCL2|MAP2K6
7165	1.0711e-09	3.9972e-08	46	1878	signal transduction	ATF1|EPO|EPAS1|CREM|TNF|HIF1A|TANK|EGFR|MAPK9|MAPK8|CCL5|CCL4|FGF20|CASP1|CCL2|FYN|CD36|MAP3K5|MAP2K6|IL10|STAT5B|JUN|TGFB1|CCL20|CDKN2A|STAT1|PRKCD|PLK1|EIF2AK3|FOS|NFKBIA|IL1A|IL6|IL5|CREB1|IL8|IFNG|PIK3CA|APC|IL1B|CDK1|ATM|GRB2|ERG|ATF6|NOX1
48856	1.1523e-09	4.2327e-08	55	2654	anatomical structure development	ATF1|EPO|CHD6|AHR|RBPJ|TNF|ETS2|YY1|TRIM28|CASP3|CASP1|IL12B|IL10|SMARCC1|SMARCC2|MMP2|FOS|BAZ1B|NCOR2|KAT2A|CREB1|IFNG|DDIT3|IRF1|HDAC2|EPAS1|CUL3|CEBPG|CUL1|PTGS2|HIF1A|KLK8|EGFR|RELB|MAPK8|FGF20|CCL2|FYN|STAT5B|JUN|JUND|TGFB1|EIF2AK3|NFATC3|SMARCA4|VEGFA|IL4|IL6|IL8|APC|CDK1|ATM|GRB2|NFE2L1|NOX1
9617	1.8183e-09	6.5768e-08	18	231	response to bacterium	IL10|STAT5B|JUN|EPO|CCL20|STAT1|FOS|PTGS2|TNF|NFKBIA|FGR|IL1A|IL6|IFNG|IL1B|CCL5|CASP1|CCL2
7275	1.99e-09	7.0886e-08	58	2970	multicellular organismal development	ATF1|EPO|CHD6|KEAP1|AHR|RBPJ|TNF|ETS2|YY1|TRIM28|CASP3|IL12B|IL10|SMARCC1|SMARCC2|MMP2|FOS|BAZ1B|NCOR2|KAT2A|CREB1|IFNG|DDIT3|IL1B|IRF1|ERG|HDAC2|EPAS1|CUL3|CEBPG|CREM|CUL1|PTGS2|HIF1A|KLK8|EGFR|RELB|MAPK8|FGF20|CCL2|FYN|STAT5B|JUN|JUND|TGFB1|EIF2AK3|NFATC3|SMARCA4|VEGFA|IL4|IL6|IL8|APC|CDK1|FOSB|ATM|GRB2|NOX1
48731	2.0881e-09	7.3269e-08	52	2420	system development	ATF1|EPO|CHD6|AHR|RBPJ|TNF|ETS2|YY1|TRIM28|CASP3|IL12B|IL10|SMARCC1|SMARCC2|MMP2|FOS|BAZ1B|NCOR2|KAT2A|CREB1|IFNG|DDIT3|IRF1|HDAC2|EPAS1|CEBPG|CUL1|PTGS2|HIF1A|KLK8|EGFR|RELB|MAPK8|FGF20|CCL2|FYN|STAT5B|JUN|JUND|TGFB1|EIF2AK3|NFATC3|SMARCA4|VEGFA|IL4|IL6|IL8|APC|CDK1|ATM|GRB2|NOX1
51094	2.1238e-09	7.3427e-08	21	347	positive regulation of developmental process	ATF1|STAT5B|JUN|JUND|TGFB1|EPO|PTGS2|ETS1|TNF|HIF1A|VEGFA|IL1A|MAPK9|IL6|IL5|IFNG|APC|IL1B|CCL5|CDK1|CD36
51707	3.6916e-09	1.2578e-07	21	357	response to other organism	IL10|STAT5B|JUN|TGFB1|EPO|CCL20|STAT1|FOS|PTGS2|TNF|FOSL1|NFKBIA|FGR|IL1A|IL6|IFNG|IL1B|CCL5|CCL4|CASP1|CCL2
45786	4.1205e-09	1.3839e-07	16	176	negative regulation of cell cycle	HDAC2|TGFB1|CDKN2A|CUL3|CUL1|ETS1|EGFR|SMARCA4|IL8|IFNG|APC|DDIT3|CASP3|IL12B|ATM|MAP2K6
2376	5.3595e-09	1.7747e-07	32	947	immune system process	EPO|EPAS1|CEBPG|ETS1|TNF|RELB|CASP3|CCL5|CCL4|CASP1|IL12B|CCL2|FYN|IL10|STAT5B|XBP1|TGFB1|CCL20|PRKCD|VEGFA|IL4|NFKBIA|IL1A|IL6|IL5|IL8|IFNG|APC|IL1B|IRF1|ATM|CCL27
9605	5.4696e-09	1.786e-07	25	551	response to external stimulus	EPO|PTGS2|TNF|CCL5|CCL4|CCL2|FYN|IL10|SREBF1|JUN|TGFB1|CCL20|STAT1|FOS|VEGFA|FOSL1|IL4|IL1A|IL6|IL8|IFNG|DDIT3|IL1B|SQSTM1|CCL27
23046	8.6857e-09	2.7595e-07	48	2156	signaling process	ATF1|EPO|EPAS1|CREM|ELK1|TNF|HIF1A|KLK8|TANK|EGFR|MAPK9|MAPK8|CCL5|CCL4|FGF20|CASP1|CCL2|FYN|CD36|MAP3K5|MAP2K6|IL10|STAT5B|JUN|TGFB1|CCL20|CDKN2A|STAT1|PRKCD|PLK1|EIF2AK3|FOS|NFKBIA|IL1A|IL6|IL5|CREB1|IL8|IFNG|PIK3CA|APC|IL1B|CDK1|ATM|GRB2|ERG|ATF6|NOX1
23060	8.6857e-09	2.7595e-07	48	2156	signal transmission	ATF1|EPO|EPAS1|CREM|ELK1|TNF|HIF1A|KLK8|TANK|EGFR|MAPK9|MAPK8|CCL5|CCL4|FGF20|CASP1|CCL2|FYN|CD36|MAP3K5|MAP2K6|IL10|STAT5B|JUN|TGFB1|CCL20|CDKN2A|STAT1|PRKCD|PLK1|EIF2AK3|FOS|NFKBIA|IL1A|IL6|IL5|CREB1|IL8|IFNG|PIK3CA|APC|IL1B|CDK1|ATM|GRB2|ERG|ATF6|NOX1
2237	9.3012e-09	2.9156e-07	14	127	response to molecule of bacterial origin	IL10|STAT5B|JUN|EPO|STAT1|FOS|PTGS2|NFKBIA|IL1A|IL6|IL1B|CCL5|CASP1|CCL2
43066	9.5614e-09	2.9578e-07	21	375	negative regulation of apoptosis	ATF1|IL10|STAT5B|RBPJ|ELK1|TNF|EGFR|VEGFA|IL4|NFKBIA|IL1A|IL6|MAPK8|PIK3CA|APC|CASP3|IL1B|CDK1|CCL2|ATM|SQSTM1
2682	1.1831e-08	3.6123e-07	22	424	regulation of immune system process	IL10|STAT5B|JUN|SPI1|TGFB1|CDKN2A|ETS1|TNF|HIF1A|VEGFA|IL4|NFKBIA|IL6|IL5|IFNG|APC|CASP3|IL1B|CCL5|IL12B|CCL2|FYN
43069	1.2339e-08	3.7192e-07	21	380	negative regulation of programmed cell death	ATF1|IL10|STAT5B|RBPJ|ELK1|TNF|EGFR|VEGFA|IL4|NFKBIA|IL1A|IL6|MAPK8|PIK3CA|APC|CASP3|IL1B|CDK1|CCL2|ATM|SQSTM1
60548	1.841e-08	5.4787e-07	21	388	negative regulation of cell death	ATF1|IL10|STAT5B|RBPJ|ELK1|TNF|EGFR|VEGFA|IL4|NFKBIA|IL1A|IL6|MAPK8|PIK3CA|APC|CASP3|IL1B|CDK1|CCL2|ATM|SQSTM1
6366	2.2871e-08	6.6833e-07	17	231	transcription from RNA polymerase II promoter	BATF3|TBP|PARP1|EPAS1|STAT1|NFATC3|NFATC1|AHR|ETS1|HIF1A|FOSL1|KAT2A|NCOR1|DDIT3|IRF1|NFE2L1|NFE2L2
48584	2.3026e-08	6.6833e-07	18	268	positive regulation of response to stimulus	STAT5B|TGFB1|CDKN2A|CEBPG|PTGS2|TNF|VEGFA|NFKBIA|IL1A|IL6|IL8|IL1B|CCL5|CASP1|IL12B|CCL2|ATM|FYN
40011	2.4736e-08	7.0919e-07	22	440	locomotion	ATF1|IL10|TGFB1|CCL20|CUL3|ETS1|TNF|EGFR|VEGFA|FOSL1|IL4|IL6|IL8|IFNG|IL1B|CCL5|CCL4|IL12B|CCL2|FYN|NOX1|CCL27
51098	2.9848e-08	8.4545e-07	16	200	regulation of binding	IL10|JUN|HDAC2|TGFB1|CDKN2A|PRKCD|CEBPG|EIF2AK3|TNF|SMARCA4|IL4|NFKBIA|IL6|IL5|DDIT3|IL1B
43170	4.2896e-08	1.2006e-06	66	4017	macromolecule metabolic process	ATF1|EPO|AHR|RBPJ|ETS1|TNF|MYSM1|TRIM28|CASP3|CASP1|IL12B|CD36|MAP3K5|IL10|BATF3|TBP|PARP1|FBXW7|MMP2|PRKCD|FOS|BAZ1B|RBX1|FGR|KAT2A|CREB1|NCOR1|IFNG|PIK3CA|DDIT3|IL1B|IRF1|ERG|ATF6|SQSTM1|HDAC2|EPAS1|CUL3|CEBPG|CUL1|HIF1A|KLK8|EGFR|MAPK9|MAPK8|CCL2|FYN|MAP2K6|TGFB1|YES1|CDKN2A|STAT1|PLK1|EIF2AK3|NFATC3|NFATC1|VEGFA|FOSL1|IL4|APC|CDK1|ATM|GRB2|NFE2L1|TRIM33|NFE2L2
45595	4.4341e-08	1.2264e-06	24	553	regulation of cell differentiation	ATF1|STAT5B|JUN|HDAC2|SPI1|JUND|TGFB1|EPO|CDKN2A|KEAP1|ETS1|TNF|HIF1A|KLK8|IL4|NFKBIA|NCOR2|MAPK9|IL6|IL5|IFNG|APC|CCL5|CD36
32496	5.1184e-08	1.3992e-06	13	116	response to lipopolysaccharide	IL10|STAT5B|JUN|EPO|STAT1|FOS|PTGS2|NFKBIA|IL1A|IL1B|CCL5|CASP1|CCL2
51704	6e-08	1.6214e-06	28	785	multi-organism process	EPO|CUL1|PTGS2|TNF|CCL5|CCL4|CASP1|CCL2|FYN|MAP3K5|IL10|STAT5B|JUN|TGFB1|TBP|CCL20|STAT1|FOS|FOSL1|NFKBIA|FGR|IL1A|IL6|KAT2A|CREB1|IFNG|IL1B|GRB2
23052	8.102e-08	2.1645e-06	57	3130	signaling	ATF1|EPO|RBPJ|ELK1|TNF|CASP1|IL12B|CD36|MAP3K5|IL10|SMARCC1|PRKCD|FOS|IL1A|CREB1|IFNG|PIK3CA|DDIT3|IL1B|ERG|ATF6|SQSTM1|EPAS1|CREM|HIF1A|KLK8|TANK|EGFR|MAPK9|MAPK8|CCL5|CCL4|FGF20|CCL2|FYN|MAP2K6|STAT5B|JUN|TGFB1|CCL20|CDKN2A|STAT1|PLK1|EIF2AK3|NFATC1|VEGFA|NFKBIA|IL6|IL5|IL8|APC|CDK1|ATM|GRB2|NOX1|CCL27|NFE2L2
10574	8.5722e-08	2.2644e-06	7	15	regulation of vascular endothelial growth factor production	IL1A|IL6|IL1B|CCL2|PTGS2|HIF1A|NOX1
6351	9.1989e-08	2.383e-06	18	291	transcription, DNA-dependent	BATF3|TBP|PARP1|EPAS1|STAT1|NFATC3|NFATC1|AHR|ETS1|HIF1A|FOSL1|KAT2A|CREB1|NCOR1|DDIT3|IRF1|NFE2L1|NFE2L2
48513	9.2237e-08	2.383e-06	42	1791	organ development	ATF1|HDAC2|EPO|EPAS1|CEBPG|CUL1|AHR|PTGS2|TNF|HIF1A|EGFR|RELB|YY1|TRIM28|CASP3|FGF20|IL12B|CCL2|FYN|IL10|STAT5B|SMARCC1|JUN|TGFB1|MMP2|EIF2AK3|NFATC3|BAZ1B|VEGFA|IL4|NCOR2|IL6|KAT2A|CREB1|IL8|APC|DDIT3|IRF1|CDK1|ATM|GRB2|NOX1
32774	1.1556e-07	2.953e-06	18	295	RNA biosynthetic process	BATF3|TBP|PARP1|EPAS1|STAT1|NFATC3|NFATC1|AHR|ETS1|HIF1A|FOSL1|KAT2A|CREB1|NCOR1|DDIT3|IRF1|NFE2L1|NFE2L2
45637	1.203e-07	3.0411e-06	11	75	regulation of myeloid cell differentiation	IL4|NFKBIA|STAT5B|JUN|SPI1|IL5|APC|CCL5|ETS1|TNF|HIF1A
42035	1.62e-07	4.0517e-06	11	77	regulation of cytokine biosynthetic process	IL10|STAT5B|IL1A|IL6|IFNG|IL1B|IRF1|CEBPG|REL|IL12B|TNF
51101	1.7308e-07	4.2833e-06	14	157	regulation of DNA binding	IL10|JUN|HDAC2|TGFB1|CDKN2A|CEBPG|TNF|SMARCA4|IL4|NFKBIA|IL6|IL5|DDIT3|IL1B
9611	2.0208e-07	4.949e-06	23	541	response to wounding	IL10|STAT5B|TGFB1|EPO|CCL20|NFATC3|FOS|TNF|HIF1A|KLK8|IL1A|IL6|IL5|IL8|CASP3|IL1B|CCL5|CCL4|CDK1|CCL2|CD36|NFE2L1|NOX1
32501	2.1075e-07	5.1079e-06	68	4374	multicellular organismal process	ATF1|EPO|CHD6|KEAP1|AHR|RBPJ|TNF|ETS2|YY1|TRIM28|CASP3|CASP1|IL12B|CD36|IL10|SMARCC1|SMARCC2|TBP|MMP2|PRKCD|FOS|BAZ1B|NCOR2|IL1A|KAT2A|CREB1|IFNG|DDIT3|IL1B|IRF1|ERG|HDAC2|EPAS1|CUL3|CEBPG|CREM|CUL1|PTGS2|HIF1A|KLK8|EGFR|RELB|MAPK8|FGF20|CCL2|FYN|MAP2K6|STAT5B|JUN|JUND|TGFB1|YES1|STAT1|EIF2AK3|NFATC3|SMARCA4|VEGFA|FOSL1|IL4|IL6|IL8|APC|CDK1|REL|FOSB|ATM|GRB2|NOX1
44260	2.1514e-07	5.1612e-06	60	3508	cellular macromolecule metabolic process	ATF1|EPO|AHR|RBPJ|ETS1|TNF|MYSM1|TRIM28|CASP3|CD36|MAP3K5|IL10|BATF3|TBP|PARP1|FBXW7|PRKCD|FOS|BAZ1B|RBX1|FGR|KAT2A|CREB1|NCOR1|IFNG|PIK3CA|DDIT3|IL1B|IRF1|ERG|ATF6|SQSTM1|HDAC2|EPAS1|CUL3|CEBPG|CUL1|HIF1A|EGFR|MAPK9|MAPK8|CCL2|FYN|MAP2K6|TGFB1|YES1|CDKN2A|STAT1|PLK1|EIF2AK3|NFATC3|NFATC1|VEGFA|FOSL1|CDK1|ATM|GRB2|NFE2L1|TRIM33|NFE2L2
1819	2.212e-07	5.2529e-06	12	103	positive regulation of cytokine production	IL1A|IL6|TGFB1|CREB1|IFNG|IL1B|CASP1|IL12B|PTGS2|TNF|HIF1A|NOX1
32844	2.9782e-07	7.0019e-06	13	133	regulation of homeostatic process	STAT5B|SPI1|TGFB1|EIF2AK3|PTGS2|ETS1|TNF|HIF1A|KLK8|VEGFA|IFNG|IL1B|CCL5
6954	3.4353e-07	7.9965e-06	18	315	inflammatory response	IL10|STAT5B|TGFB1|CCL20|NFATC3|FOS|TNF|HIF1A|IL1A|IL6|IL5|IL8|IL1B|CCL5|CCL4|CCL2|NFE2L1|NOX1
1775	3.706e-07	8.5419e-06	17	275	cell activation	IL10|STAT5B|TGFB1|PRKCD|CEBPG|TNF|EGFR|RELB|IL4|IL6|IL8|APC|IRF1|CASP1|IL12B|ATM|FYN
51090	3.9585e-07	8.9485e-06	13	136	regulation of transcription factor activity	IL10|HDAC2|TGFB1|CDKN2A|CEBPG|TNF|SMARCA4|IL4|NFKBIA|IL6|IL5|DDIT3|IL1B
90046	3.9585e-07	8.9485e-06	13	136	regulation of transcription regulator activity	IL10|HDAC2|TGFB1|CDKN2A|CEBPG|TNF|SMARCA4|IL4|NFKBIA|IL6|IL5|DDIT3|IL1B
7610	5.854e-07	1.3107e-05	21	466	behavior	ATF1|IL10|JUN|CCL20|FOS|PTGS2|KLK8|VEGFA|FOSL1|IL4|IL6|IL8|IFNG|IL1B|CCL5|CCL4|CASP1|CCL2|FOSB|FYN|CCL27
42129	7.7153e-07	1.7112e-05	10	66	regulation of T cell proliferation	IL4|IL10|STAT5B|IL6|TGFB1|IFNG|CDKN2A|CASP3|IL1B|IL12B
10646	1.0038e-06	2.2057e-05	32	1154	regulation of cell communication	ATF1|EPO|CUL3|PTGS2|TNF|HIF1A|KLK8|EGFR|CASP1|CCL2|MAP3K5|MAP2K6|TGFB1|CDKN2A|PRKCD|EIF2AK3|VEGFA|IL4|NFKBIA|IL1A|IL6|IL5|CREB1|NCOR1|IFNG|APC|IL1B|REL|ATM|GRB2|SQSTM1|TRIM33
23033	1.0368e-06	2.257e-05	44	2100	signaling pathway	CREM|RBPJ|TNF|TANK|EGFR|MAPK9|MAPK8|FGF20|IL12B|CCL2|FYN|CD36|MAP3K5|MAP2K6|IL10|STAT5B|SMARCC1|JUN|TGFB1|CDKN2A|STAT1|PRKCD|PLK1|EIF2AK3|NFATC1|FOS|VEGFA|NFKBIA|IL1A|IL6|IL5|CREB1|IL8|IFNG|PIK3CA|APC|DDIT3|IL1B|CDK1|ATM|GRB2|ATF6|SQSTM1|NFE2L2
50670	1.3333e-06	2.8757e-05	11	93	regulation of lymphocyte proliferation	IL4|IL10|STAT5B|IL6|TGFB1|IL5|IFNG|CDKN2A|CASP3|IL1B|IL12B
32944	1.5003e-06	3.2064e-05	11	94	regulation of mononuclear cell proliferation	IL4|IL10|STAT5B|IL6|TGFB1|IL5|IFNG|CDKN2A|CASP3|IL1B|IL12B
6350	1.5287e-06	3.2378e-05	18	345	transcription	BATF3|TBP|PARP1|EPAS1|STAT1|NFATC3|NFATC1|AHR|ETS1|HIF1A|FOSL1|KAT2A|CREB1|NCOR1|DDIT3|IRF1|NFE2L1|NFE2L2
6468	1.6004e-06	3.3595e-05	24	657	protein amino acid phosphorylation	TGFB1|YES1|STAT1|PRKCD|PLK1|EIF2AK3|BAZ1B|TNF|EGFR|FGR|MAPK9|MAPK8|CREB1|TRIM28|IFNG|PIK3CA|IL1B|CDK1|CCL2|ATM|FYN|ERG|MAP3K5|MAP2K6
70663	1.6858e-06	3.4882e-05	11	95	regulation of leukocyte proliferation	IL4|IL10|STAT5B|IL6|TGFB1|IL5|IFNG|CDKN2A|CASP3|IL1B|IL12B
42108	1.7063e-06	3.4882e-05	9	51	positive regulation of cytokine biosynthetic process	STAT5B|IL1A|IFNG|IL1B|IRF1|CEBPG|REL|IL12B|TNF
50864	1.7063e-06	3.4882e-05	9	51	regulation of B cell activation	IL4|IL10|STAT5B|IL6|TGFB1|IL5|IFNG|CDKN2A|CASP3
43687	2.3777e-06	4.819e-05	33	1266	post-translational protein modification	HDAC2|CUL3|CUL1|TNF|MYSM1|EGFR|MAPK9|MAPK8|TRIM28|CCL2|FYN|MAP3K5|MAP2K6|TGFB1|YES1|PARP1|FBXW7|STAT1|PRKCD|PLK1|EIF2AK3|BAZ1B|RBX1|FGR|KAT2A|CREB1|IFNG|PIK3CA|IL1B|CDK1|ATM|ERG|TRIM33
9628	2.6203e-06	5.2652e-05	19	404	response to abiotic stimulus	JUN|HDAC2|TGFB1|EPO|STAT1|FOS|TNF|EGFR|VEGFA|FOSL1|IL1A|MAPK8|CASP3|IL1B|IL12B|CCL2|ATM|FYN|NOX1
51674	2.9433e-06	5.8149e-05	17	314	localization of cell	ATF1|IL10|TGFB1|CUL3|ETS1|TNF|EGFR|VEGFA|IL6|IL8|IFNG|IL1B|CCL5|IL12B|CCL2|FYN|NOX1
48870	2.9433e-06	5.8149e-05	17	314	cell motility	ATF1|IL10|TGFB1|CUL3|ETS1|TNF|EGFR|VEGFA|IL6|IL8|IFNG|IL1B|CCL5|IL12B|CCL2|FYN|NOX1
6952	3.047e-06	5.9696e-05	23	620	defense response	IL10|STAT5B|TGFB1|CCL20|CEBPG|NFATC3|FOS|TNF|HIF1A|FOSL1|IL4|FGR|IL1A|IL6|IL5|IL8|IFNG|IL1B|CCL5|CCL4|CCL2|NFE2L1|NOX1
80134	3.7567e-06	7.2991e-05	17	319	regulation of response to stress	IL10|STAT5B|CDKN2A|CEBPG|PTGS2|TNF|KLK8|NFKBIA|IL1A|IL6|NCOR1|APC|IL1B|CCL5|IL12B|ATM|MAP3K5
10647	3.8003e-06	7.3234e-05	19	413	positive regulation of cell communication	TGFB1|EPO|CDKN2A|EIF2AK3|PTGS2|TNF|HIF1A|EGFR|VEGFA|IL4|IL1A|IL6|IL5|IFNG|IL1B|REL|CASP1|CCL2|ATM
10627	4.552e-06	8.7006e-05	17	323	regulation of intracellular protein kinase cascade	TGFB1|EPO|TNF|EGFR|IL4|IL1A|IL6|IL5|NCOR1|IFNG|APC|IL1B|REL|CASP1|GRB2|SQSTM1|MAP3K5
16477	4.9357e-06	9.3578e-05	16	281	cell migration	ATF1|IL10|TGFB1|CUL3|TNF|EGFR|VEGFA|IL6|IL8|IFNG|IL1B|CCL5|IL12B|CCL2|FYN|NOX1
23034	5.1467e-06	9.6799e-05	31	1158	intracellular signaling pathway	CREM|TNF|TANK|EGFR|MAPK9|MAPK8|CCL2|FYN|CD36|MAP3K5|MAP2K6|IL10|STAT5B|CDKN2A|STAT1|PRKCD|PLK1|EIF2AK3|NFATC1|NFKBIA|IL8|IFNG|PIK3CA|DDIT3|IL1B|CDK1|ATM|GRB2|ATF6|SQSTM1|NFE2L2
42330	6.0757e-06	0.00011247	13	169	taxis	IL10|CCL20|VEGFA|FOSL1|IL4|IL6|IL8|IFNG|IL1B|CCL5|CCL4|CCL2|CCL27
6935	6.0757e-06	0.00011247	13	169	chemotaxis	IL10|CCL20|VEGFA|FOSL1|IL4|IL6|IL8|IFNG|IL1B|CCL5|CCL4|CCL2|CCL27
7050	6.8495e-06	0.00012581	11	108	cell cycle arrest	TGFB1|IL8|IFNG|APC|CDKN2A|DDIT3|CUL3|CUL1|IL12B|ATM|MAP2K6
32880	7.5553e-06	0.00013769	13	172	regulation of protein localization	IL10|TGFB1|CDKN2A|TNF|EGFR|NFKBIA|IL1A|IL6|IFNG|APC|IL1B|CDK1|CASP1
30595	9.6776e-06	0.00017502	8	42	leukocyte chemotaxis	IL10|IL6|IL8|IFNG|IL1B|CCL5|CCL2|VEGFA
51222	1.0123e-05	0.00018168	10	85	positive regulation of protein transport	IL10|IL1A|IL6|TGFB1|IFNG|IL1B|CDK1|CASP1|TNF|EGFR
50900	1.0599e-05	0.00018878	9	62	leukocyte migration	IL10|IL6|IL8|IFNG|IL1B|CCL5|CCL2|TNF|VEGFA
51223	1.2472e-05	0.00021882	12	145	regulation of protein transport	NFKBIA|IL10|IL1A|IL6|TGFB1|IFNG|CDKN2A|IL1B|CDK1|CASP1|TNF|EGFR
7568	1.2472e-05	0.00021882	12	145	aging	JUN|TGFB1|EPO|CDKN2A|DDIT3|IL1B|CCL5|PRKCD|CDK1|ATM|GRB2|FOS
30154	1.2711e-05	0.00022087	37	1666	cell differentiation	ATF1|HDAC2|EPO|EPAS1|CUL3|CEBPG|CREM|RBPJ|HIF1A|KLK8|EGFR|RELB|TRIM28|CASP3|FGF20|CASP1|IL12B|FYN|IL10|STAT5B|JUN|JUND|TGFB1|EIF2AK3|ETV6|VEGFA|IL4|NCOR2|IL6|CREB1|IFNG|APC|IRF1|CDK1|ATM|GRB2|SQSTM1
32103	1.2777e-05	0.00022087	10	87	positive regulation of response to external stimulus	STAT5B|IL6|TGFB1|IL8|IL1B|CCL5|CCL2|PTGS2|TNF|VEGFA
32268	1.5717e-05	0.00026971	21	558	regulation of cellular protein metabolic process	IL10|JUN|HDAC2|TGFB1|EPO|CDKN2A|PRKCD|PLK1|CUL1|EIF2AK3|TNF|EGFR|VEGFA|IL4|NFKBIA|IL6|IL5|IFNG|IL1B|CDK1|MAP3K5
14070	1.7067e-05	0.00029077	12	149	response to organic cyclic substance	ATF1|FOSL1|IL1A|JUN|HDAC2|TGFB1|STAT1|IL1B|CDK1|CASP1|FOS|PTGS2
6979	1.7339e-05	0.00029327	13	184	response to oxidative stress	JUN|EPO|EPAS1|STAT1|FOS|PTGS2|HIF1A|EGFR|KLF2|FOSL1|DDIT3|CCL5|CDK1
70201	2.3139e-05	0.00038857	12	153	regulation of establishment of protein localization	NFKBIA|IL10|IL1A|IL6|TGFB1|IFNG|CDKN2A|IL1B|CDK1|CASP1|TNF|EGFR
60326	2.4968e-05	0.00041632	8	47	cell chemotaxis	IL10|IL6|IL8|IFNG|IL1B|CCL5|CCL2|VEGFA
48869	2.7138e-05	0.00044695	37	1712	cellular developmental process	ATF1|HDAC2|EPO|EPAS1|CUL3|CEBPG|CREM|RBPJ|HIF1A|KLK8|EGFR|RELB|TRIM28|CASP3|FGF20|CASP1|IL12B|FYN|IL10|STAT5B|JUN|JUND|TGFB1|EIF2AK3|ETV6|VEGFA|IL4|NCOR2|IL6|CREB1|IFNG|APC|IRF1|CDK1|ATM|GRB2|SQSTM1
51246	2.7345e-05	0.00044695	22	634	regulation of protein metabolic process	IL10|JUN|HDAC2|TGFB1|EPO|CDKN2A|PRKCD|PLK1|CUL1|EIF2AK3|TNF|EGFR|VEGFA|IL4|NFKBIA|IL6|IL5|IFNG|APC|IL1B|CDK1|MAP3K5
32101	2.7376e-05	0.00044695	13	191	regulation of response to external stimulus	IL10|STAT5B|TGFB1|PTGS2|TNF|KLK8|VEGFA|IL6|IL8|APC|IL1B|CCL5|CCL2
8219	3.0191e-05	0.00048952	23	698	cell death	JUN|TGFB1|TBP|EPO|CDKN2A|STAT1|CUL1|EIF2AK3|AHR|TNF|KLK8|FOSL2|NFKBIA|IL1A|IL6|MAPK8|IFNG|CASP3|IL1B|CASP1|ATM|SQSTM1|MAP3K5
31399	3.0548e-05	0.00049017	17	366	regulation of protein modification process	JUN|TGFB1|EPO|CDKN2A|PRKCD|PLK1|CUL1|TNF|EGFR|VEGFA|IL4|IL6|IL5|IFNG|IL1B|CDK1|MAP3K5
30098	3.0649e-05	0.00049017	10	95	lymphocyte differentiation	IL4|IL10|STAT5B|TGFB1|APC|IRF1|CEBPG|IL12B|ATM|RELB
45321	3.264e-05	0.00051849	14	233	leukocyte activation	IL10|STAT5B|TGFB1|PRKCD|CEBPG|RELB|IL4|IL8|APC|IRF1|CASP1|IL12B|ATM|FYN
16265	3.4591e-05	0.0005458	23	703	death	JUN|TGFB1|TBP|EPO|CDKN2A|STAT1|CUL1|EIF2AK3|AHR|TNF|KLK8|FOSL2|NFKBIA|IL1A|IL6|MAPK8|IFNG|CASP3|IL1B|CASP1|ATM|SQSTM1|MAP3K5
6928	3.7523e-05	0.00058629	19	474	cellular component movement	ATF1|IL10|TGFB1|CUL3|PTGS2|ETS1|TNF|EGFR|VEGFA|IL6|IL8|IFNG|IL1B|CCL5|CCL4|IL12B|CCL2|FYN|NOX1
51384	3.7656e-05	0.00058629	10	97	response to glucocorticoid stimulus	FOSL1|IL10|IL6|TGFB1|IL1B|CCL5|CCL2|FOS|PTGS2|TNF
10035	4.2918e-05	0.00066381	14	238	response to inorganic substance	ATF1|JUN|EPO|STAT1|FOS|PTGS2|EGFR|KLF2|FOSL1|IL1A|MAPK9|MAPK8|DDIT3|CDK1
71310	4.5297e-05	0.00069604	14	239	cellular response to organic substance	STAT5B|SMARCC1|TGFB1|PARP1|STAT1|EIF2AK3|FOS|KLF2|IFNG|DDIT3|CDK1|GRB2|ATF6|NFE2L2
8285	5.1595e-05	0.00078766	17	379	negative regulation of cell proliferation	IL10|JUN|TGFB1|CDKN2A|CUL1|PTGS2|ETS1|TNF|FOSL1|IL1A|IL6|IL8|IFNG|APC|CASP3|IL1B|IL12B
16310	5.7729e-05	0.00087561	24	786	phosphorylation	TGFB1|YES1|STAT1|PRKCD|PLK1|EIF2AK3|BAZ1B|TNF|EGFR|FGR|MAPK9|MAPK8|CREB1|TRIM28|IFNG|PIK3CA|IL1B|CDK1|CCL2|ATM|FYN|ERG|MAP3K5|MAP2K6
65009	6.2172e-05	0.00093696	28	1062	regulation of molecular function	ATF1|HDAC2|CEBPG|CUL1|TNF|HIF1A|EGFR|CASP3|MAP3K5|MAP2K6|IL10|JUN|TGFB1|CDKN2A|STAT1|PRKCD|PLK1|EIF2AK3|SMARCA4|IL4|NFKBIA|IL6|IL5|IFNG|APC|DDIT3|IL1B|CDK1
32879	6.5371e-05	0.0009789	23	727	regulation of localization	ATF1|IL10|STAT5B|TGFB1|CDKN2A|RBPJ|PTGS2|ETS1|TNF|HIF1A|EGFR|VEGFA|NFKBIA|IL1A|IL6|CREB1|IFNG|APC|IL1B|CDK1|CASP1|CCL2|CD36
9719	7.1281e-05	0.0010606	19	493	response to endogenous stimulus	IL10|STAT5B|SMARCC1|TGFB1|PARP1|EPO|STAT1|FOS|PTGS2|TNF|FOSL1|IL1A|IL6|DDIT3|IL1B|CCL5|CDK1|CCL2|GRB2
31960	7.4701e-05	0.0011045	10	104	response to corticosteroid stimulus	FOSL1|IL10|IL6|TGFB1|IL1B|CCL5|CCL2|FOS|PTGS2|TNF
34097	9.8635e-05	0.0014413	10	107	response to cytokine stimulus	FOSL1|STAT5B|JUN|EPO|STAT1|CASP3|CCL5|FOS|PTGS2|KLF2
6955	9.87e-05	0.0014413	21	619	immune response	IL10|XBP1|TGFB1|CCL20|PRKCD|CEBPG|ETS1|TNF|RELB|VEGFA|IL4|IL1A|IL6|IL5|IL8|IL1B|CCL5|CCL4|IL12B|CCL2|CCL27
7346	9.9919e-05	0.0014501	12	174	regulation of mitotic cell cycle	STAT5B|IL1A|TGFB1|APC|CDKN2A|IL1B|PLK1|CDK1|ATM|TNF|EGFR|SMARCA4
45597	0.00010383	0.0014975	14	255	positive regulation of cell differentiation	STAT5B|JUN|JUND|TGFB1|EPO|ETS1|HIF1A|MAPK9|IL6|IL5|IFNG|APC|CCL5|CD36
51099	0.00011815	0.0016937	10	109	positive regulation of binding	IL4|IL10|IL6|TGFB1|IL5|IL1B|CEBPG|EIF2AK3|TNF|SMARCA4
1932	0.00012809	0.0018251	13	217	regulation of protein amino acid phosphorylation	JUN|TGFB1|EPO|PRKCD|TNF|EGFR|VEGFA|IL4|IL6|IL5|IFNG|IL1B|MAP3K5
60341	0.00013139	0.0018608	15	305	regulation of cellular localization	ATF1|IL10|TGFB1|CDKN2A|TNF|EGFR|NFKBIA|IL1A|IL6|CREB1|IFNG|APC|IL1B|CDK1|CASP1
51091	0.0001346	0.0018836	9	82	positive regulation of transcription factor activity	IL4|IL10|IL6|TGFB1|IL5|IL1B|CEBPG|TNF|SMARCA4
90047	0.0001346	0.0018836	9	82	positive regulation of transcription regulator activity	IL4|IL10|IL6|TGFB1|IL5|IL1B|CEBPG|TNF|SMARCA4
6338	0.00014182	0.0019729	8	58	chromatin remodeling	SMARCC1|KAT2A|HDAC2|SMARCC2|CHD6|BAZ1A|BAZ1B|SMARCA4
51247	0.00014341	0.0019833	15	307	positive regulation of protein metabolic process	HDAC2|TGFB1|EPO|PLK1|CUL1|TNF|VEGFA|IL4|NFKBIA|IL6|IL5|IFNG|APC|IL1B|CDK1
44093	0.00016716	0.0022982	21	638	positive regulation of molecular function	ATF1|IL10|TGFB1|CDKN2A|STAT1|PLK1|CEBPG|CUL1|EIF2AK3|TNF|HIF1A|EGFR|SMARCA4|IL4|IL6|IL5|IFNG|IL1B|CDK1|MAP3K5|MAP2K6
44238	0.00019955	0.0027186	70	5288	primary metabolic process	ATF1|EPO|AHR|RBPJ|ETS1|TNF|MYSM1|TRIM28|CASP3|CASP1|CD36|MAP3K5|SREBF1|BATF3|TBP|PARP1|FBXW7|MMP2|PRKCD|FOS|BAZ1B|RBX1|FGR|KAT2A|CREB1|NCOR1|IFNG|PIK3CA|DDIT3|IL1B|IRF1|ERG|ATF6|SQSTM1|ATF3|ATF4|HDAC2|EPAS1|CUL3|CEBPG|CREM|CUL1|PTGS2|HIF1A|KLK8|EGFR|MAPK9|MAPK8|CCL2|FYN|MAP2K6|STAT5B|TGFB1|YES1|CDKN2A|STAT1|PLK1|EIF2AK3|NFATC3|NFATC1|VEGFA|FOSL1|IL4|APC|CDK1|ATM|NFE2L1|NOX1|TRIM33|NFE2L2
6917	0.00020224	0.0027186	15	315	induction of apoptosis	TGFB1|CDKN2A|STAT1|CUL3|CEBPG|CUL1|ETS1|TNF|MAPK9|MAPK8|CASP3|CASP1|ATM|SQSTM1|MAP3K5
23014	0.00020237	0.0027186	16	364	signal transmission via phosphorylation event	IL10|STAT5B|STAT1|TNF|TANK|EGFR|NFKBIA|MAPK9|MAPK8|IFNG|PIK3CA|IL1B|CCL2|FYN|MAP3K5|MAP2K6
7243	0.00020237	0.0027186	16	364	intracellular protein kinase cascade	IL10|STAT5B|STAT1|TNF|TANK|EGFR|NFKBIA|MAPK9|MAPK8|IFNG|PIK3CA|IL1B|CCL2|FYN|MAP3K5|MAP2K6
12502	0.00021096	0.0028056	15	316	induction of programmed cell death	TGFB1|CDKN2A|STAT1|CUL3|CEBPG|CUL1|ETS1|TNF|MAPK9|MAPK8|CASP3|CASP1|ATM|SQSTM1|MAP3K5
46649	0.00021122	0.0028056	12	186	lymphocyte activation	IL4|IL10|STAT5B|TGFB1|APC|IRF1|PRKCD|CEBPG|IL12B|ATM|FYN|RELB
2637	0.00022929	0.0030284	6	24	regulation of immunoglobulin production	IL4|IL10|IL6|TGFB1|IFNG|TNF
7626	0.00024631	0.003235	14	273	locomotory behavior	ATF1|IL10|CCL20|VEGFA|FOSL1|IL4|IL6|IL8|IFNG|IL1B|CCL5|CCL4|CCL2|CCL27
43412	0.00026338	0.00344	34	1607	macromolecule modification	HDAC2|CUL3|CUL1|TNF|MYSM1|EGFR|MAPK9|MAPK8|TRIM28|CCL2|FYN|MAP3K5|MAP2K6|TGFB1|YES1|PARP1|FBXW7|STAT1|PRKCD|PLK1|EIF2AK3|FOS|BAZ1B|RBX1|FGR|KAT2A|CREB1|IFNG|PIK3CA|IL1B|CDK1|ATM|ERG|TRIM33
6464	0.00026822	0.0034839	33	1526	protein modification process	HDAC2|CUL3|CUL1|TNF|MYSM1|EGFR|MAPK9|MAPK8|TRIM28|CCL2|FYN|MAP3K5|MAP2K6|TGFB1|YES1|PARP1|FBXW7|STAT1|PRKCD|PLK1|EIF2AK3|BAZ1B|RBX1|FGR|KAT2A|CREB1|IFNG|PIK3CA|IL1B|CDK1|ATM|ERG|TRIM33
9967	0.00028262	0.0036499	14	276	positive regulation of signal transduction	TGFB1|EPO|EIF2AK3|TNF|EGFR|VEGFA|IL4|IL1A|IL6|IL5|IFNG|IL1B|REL|CASP1
30097	0.00028411	0.0036499	13	232	hemopoiesis	IL10|STAT5B|TGFB1|EPO|EPAS1|CEBPG|RELB|VEGFA|IL4|APC|IRF1|IL12B|ATM
10551	0.00029638	0.0037869	11	154	regulation of gene-specific transcription from RNA polymerase II promoter	ATF1|YY1|NFKBIA|NCOR2|HDAC2|TGFB1|CREB1|NCOR1|IL1B|ETS1|SMARCA4
32675	0.0003025	0.0038442	7	42	regulation of interleukin-6 production	IL10|IL1A|IL6|IFNG|IL1B|TNF|KLF2
9653	0.00030465	0.0038508	29	1218	anatomical structure morphogenesis	ATF1|EPAS1|CUL3|CUL1|TNF|HIF1A|KLK8|EGFR|YY1|TRIM28|CASP1|CCL2|IL10|SMARCC1|JUN|TGFB1|MMP2|BAZ1B|VEGFA|NCOR2|KAT2A|CREB1|IL8|APC|CDK1|ATM|GRB2|NFE2L1|NOX1
51054	0.0003151	0.003942	8	64	positive regulation of DNA metabolic process	ATF1|IL4|JUN|TGFB1|IFNG|EPO|CEBPG|CDK1
10575	0.00031523	0.003942	5	13	positive regulation vascular endothelial growth factor production	IL1A|IL1B|PTGS2|HIF1A|NOX1
50863	0.0003245	0.0040365	10	121	regulation of T cell activation	IL4|IL10|STAT5B|IL6|TGFB1|IFNG|CDKN2A|CASP3|IL1B|IL12B
35466	0.00034816	0.004308	26	1003	regulation of signaling pathway	EPO|CUL3|TNF|HIF1A|EGFR|CASP1|MAP3K5|MAP2K6|TGFB1|CDKN2A|PRKCD|VEGFA|IL4|NFKBIA|IL1A|IL6|IL5|NCOR1|IFNG|APC|IL1B|REL|ATM|GRB2|SQSTM1|TRIM33
23056	0.00035405	0.004358	14	281	positive regulation of signaling process	TGFB1|EPO|EIF2AK3|TNF|EGFR|VEGFA|IL4|IL1A|IL6|IL5|IFNG|IL1B|REL|CASP1
51249	0.00036201	0.0044327	11	157	regulation of lymphocyte activation	IL4|IL10|STAT5B|IL6|TGFB1|IL5|IFNG|CDKN2A|CASP3|IL1B|IL12B
35468	0.00036896	0.0044944	16	380	positive regulation of signaling pathway	TGFB1|EPO|CDKN2A|TNF|HIF1A|EGFR|VEGFA|IL4|IL1A|IL6|IL5|IFNG|IL1B|REL|CASP1|ATM
43388	0.00041156	0.0049875	9	93	positive regulation of DNA binding	IL4|IL10|IL6|TGFB1|IL5|IL1B|CEBPG|TNF|SMARCA4
6916	0.00044765	0.005397	12	199	anti-apoptosis	ATF1|NFKBIA|IL10|STAT5B|IL1A|PIK3CA|IL1B|CDK1|CCL2|TNF|SQSTM1|VEGFA
48872	0.00045221	0.0054242	9	94	homeostasis of number of cells	STAT5B|IL6|TGFB1|IFNG|EPO|EPAS1|CASP3|CEBPG|VEGFA
51043	0.00048733	0.0058158	5	14	regulation of membrane protein ectodomain proteolysis	IL10|IFNG|EPO|IL1B|TNF
71445	0.00049481	0.0058752	6	27	cellular response to protein stimulus	IFNG|DDIT3|EIF2AK3|CDK1|ATF6|NFE2L2
2521	0.00051598	0.0060959	10	127	leukocyte differentiation	IL4|IL10|STAT5B|TGFB1|APC|IRF1|CEBPG|IL12B|ATM|RELB
32270	0.00052503	0.0061717	14	290	positive regulation of cellular protein metabolic process	HDAC2|TGFB1|EPO|PLK1|CUL1|TNF|VEGFA|IL4|NFKBIA|IL6|IL5|IFNG|IL1B|CDK1
51052	0.00064471	0.0075264	10	130	regulation of DNA metabolic process	ATF1|IL4|IL10|JUN|TGFB1|IFNG|EPO|FBXW7|CEBPG|CDK1
19221	0.00064668	0.0075264	8	70	cytokine-mediated signaling pathway	STAT5B|IL1A|IL6|IL5|STAT1|IL1B|CCL2|TNF
50714	0.00068306	0.0079107	7	47	positive regulation of protein secretion	IL10|IL1A|IL6|TGFB1|IFNG|CASP1|TNF
42327	0.0006935	0.0079923	10	131	positive regulation of phosphorylation	IL4|IL6|TGFB1|IL5|IFNG|EPO|IL1B|TNF|EGFR|VEGFA
23036	0.00072413	0.0082113	8	71	initiation of signal transduction	STAT5B|IL1A|IL6|IL5|STAT1|IL1B|CCL2|TNF
23038	0.00072413	0.0082113	8	71	signal initiation by diffusible mediator	STAT5B|IL1A|IL6|IL5|STAT1|IL1B|CCL2|TNF
23049	0.00072413	0.0082113	8	71	signal initiation by protein/peptide mediator	STAT5B|IL1A|IL6|IL5|STAT1|IL1B|CCL2|TNF
32770	0.00072648	0.0082113	5	15	positive regulation of monooxygenase activity	ATF1|IFNG|IL1B|TNF|HIF1A
32768	0.00078409	0.0088201	6	29	regulation of monooxygenase activity	ATF1|IFNG|IL1B|TNF|HIF1A|EGFR
45937	0.00085997	0.0095368	10	134	positive regulation of phosphate metabolic process	IL4|IL6|TGFB1|IL5|IFNG|EPO|IL1B|TNF|EGFR|VEGFA
51047	0.00085997	0.0095368	10	134	positive regulation of secretion	ATF1|IL10|IL1A|IL6|TGFB1|CREB1|IFNG|IL1B|CASP1|TNF
10562	0.00085997	0.0095368	10	134	positive regulation of phosphorus metabolic process	IL4|IL6|TGFB1|IL5|IFNG|EPO|IL1B|TNF|EGFR|VEGFA
71216	0.00092113	0.010167	7	49	cellular response to biotic stimulus	NFKBIA|IFNG|STAT1|DDIT3|EIF2AK3|ATF6|NFE2L2
9966	0.00096691	0.010622	22	773	regulation of signal transduction	TGFB1|EPO|CUL3|PRKCD|EIF2AK3|TNF|EGFR|VEGFA|IL4|IL1A|IL6|IL5|NCOR1|IFNG|APC|IL1B|REL|CASP1|GRB2|SQSTM1|MAP3K5|MAP2K6
48534	0.00099037	0.01083	13	258	hemopoietic or lymphoid organ development	IL10|STAT5B|TGFB1|EPO|EPAS1|CEBPG|RELB|VEGFA|IL4|APC|IRF1|IL12B|ATM
44237	0.0010073	0.010964	66	4989	cellular metabolic process	ATF1|EPO|AHR|RBPJ|ETS1|TNF|MYSM1|TRIM28|CASP3|CD36|MAP3K5|IL10|BATF3|TBP|PARP1|FBXW7|PRKCD|FOS|BAZ1B|RBX1|FGR|KAT2A|CREB1|NCOR1|IFNG|PIK3CA|DDIT3|IL1B|IRF1|ERG|ATF6|SQSTM1|ATF3|ATF4|HDAC2|EPAS1|CUL3|CEBPG|CREM|CUL1|PTGS2|HIF1A|EGFR|MAPK9|MAPK8|CCL2|FYN|MAP2K6|STAT5B|TGFB1|YES1|CDKN2A|STAT1|PLK1|EIF2AK3|NFATC3|NFATC1|VEGFA|FOSL1|CDK1|ATM|GRB2|NFE2L1|NOX1|TRIM33|NFE2L2
51272	0.0010607	0.011478	10	137	positive regulation of cellular component movement	STAT5B|IL6|TGFB1|APC|CCL2|PTGS2|ETS1|HIF1A|EGFR|VEGFA
2706	0.0010643	0.011478	7	50	regulation of lymphocyte mediated immunity	IL4|IL10|STAT5B|TGFB1|IFNG|IL1B|IL12B
23051	0.0010822	0.011618	22	778	regulation of signaling process	TGFB1|EPO|CUL3|PRKCD|EIF2AK3|TNF|EGFR|VEGFA|IL4|IL1A|IL6|IL5|NCOR1|IFNG|APC|IL1B|REL|CASP1|GRB2|SQSTM1|MAP3K5|MAP2K6
34391	0.0011821	0.012632	4	7	regulation of smooth muscle cell apoptosis	IFNG|CDKN2A|IL12B|RBPJ
2697	0.0011902	0.012661	9	105	regulation of immune effector process	IL4|IL10|STAT5B|IL6|TGFB1|IFNG|IL1B|IL12B|TNF
45428	0.0012001	0.012709	6	31	regulation of nitric oxide biosynthetic process	IL10|IFNG|IL1B|PTGS2|TNF|EGFR
65008	0.0012141	0.0128	32	1541	regulation of biological quality	EPO|EPAS1|CEBPG|PTGS2|TNF|HIF1A|KLK8|CASP3|CCL5|CCL2|FYN|CD36|IL10|STAT5B|JUN|TGFB1|YES1|PARP1|CDKN2A|PRKCD|EIF2AK3|VEGFA|NFKBIA|NCOR2|IL1A|IL6|CREB1|IFNG|APC|DDIT3|IL1B|NOX1
9991	0.0012939	0.01358	13	264	response to extracellular stimulus	SREBF1|JUN|TGFB1|EPO|STAT1|FOS|PTGS2|FOSL1|IL1A|DDIT3|IL1B|CCL2|SQSTM1
9987	0.0013149	0.01374	97	9366	cellular process	ATF1|EPO|AHR|RBPJ|ELK1|ETS1|TNF|TRIM28|IL12B|SKP2|MAP3K5|SMARCC1|SMARCC2|FBXW7|PRKCD|RBX1|DMTF1|DDIT3|ERG|ATF6|SQSTM1|ATF3|ATF4|EPAS1|CUL3|CREM|CUL1|HIF1A|KLK8|FGF20|MAP2K6|STAT5B|JUN|JUND|TGFB1|YES1|PLK1|EIF2AK3|NFATC3|NFATC1|FOSL2|SMARCA4|FOSL1|IL4|NFKBIA|IL6|IL8|CDK1|ATM|GRB2|NFE2L1|NOX1|NFE2L2|CHD6|MYSM1|CASP3|CASP1|CD36|IL10|SREBF1|BATF3|TBP|PARP1|BAZ1A|FOS|BAZ1B|ETV6|FGR|NCOR2|IL1A|KAT2A|CR…
50730	0.0013781	0.014336	8	77	regulation of peptidyl-tyrosine phosphorylation	IL4|IL6|IL5|IFNG|EPO|PRKCD|EGFR|VEGFA
2694	0.0013902	0.014398	11	179	regulation of leukocyte activation	IL4|IL10|STAT5B|IL6|TGFB1|IL5|IFNG|CDKN2A|CASP3|IL1B|IL12B
2675	0.0014786	0.015246	5	17	positive regulation of acute inflammatory response	IL6|IL1B|CCL5|PTGS2|TNF
10740	0.0014861	0.015257	12	222	positive regulation of intracellular protein kinase cascade	IL4|IL1A|IL6|TGFB1|IL5|IFNG|EPO|IL1B|REL|CASP1|TNF|EGFR
51050	0.0016786	0.017159	13	270	positive regulation of transport	ATF1|IL10|TGFB1|TNF|EGFR|NFKBIA|IL1A|IL6|CREB1|IFNG|IL1B|CDK1|CASP1
33157	0.0016868	0.017168	8	79	regulation of intracellular protein transport	NFKBIA|IL10|TGFB1|CDKN2A|IL1B|CDK1|TNF|EGFR
48545	0.0017194	0.017424	12	225	response to steroid hormone stimulus	FOSL1|IL10|STAT5B|IL6|TGFB1|EPO|IL1B|CCL5|CCL2|FOS|PTGS2|TNF
2520	0.0019893	0.020072	13	274	immune system development	IL10|STAT5B|TGFB1|EPO|EPAS1|CEBPG|RELB|VEGFA|IL4|APC|IRF1|IL12B|ATM
6793	0.0020733	0.020742	24	949	phosphorus metabolic process	TGFB1|YES1|STAT1|PRKCD|PLK1|EIF2AK3|BAZ1B|TNF|EGFR|FGR|MAPK9|MAPK8|CREB1|TRIM28|IFNG|PIK3CA|IL1B|CDK1|CCL2|ATM|FYN|ERG|MAP3K5|MAP2K6
6796	0.0020733	0.020742	24	949	phosphate metabolic process	TGFB1|YES1|STAT1|PRKCD|PLK1|EIF2AK3|BAZ1B|TNF|EGFR|FGR|MAPK9|MAPK8|CREB1|TRIM28|IFNG|PIK3CA|IL1B|CDK1|CCL2|ATM|FYN|ERG|MAP3K5|MAP2K6
34976	0.0021511	0.021429	6	34	response to endoplasmic reticulum stress	IFNG|DDIT3|EIF2AK3|ATF6|ATF4|NFE2L2
30155	0.0021942	0.021766	10	148	regulation of cell adhesion	STAT5B|TGFB1|IL8|IFNG|APC|CDKN2A|IL1B|IL12B|CD36|TNF
46822	0.0022605	0.02233	8	82	regulation of nucleocytoplasmic transport	NFKBIA|IL10|TGFB1|CDKN2A|IL1B|CDK1|TNF|EGFR
31401	0.0022864	0.022491	12	231	positive regulation of protein modification process	IL4|IL6|TGFB1|IL5|IFNG|EPO|IL1B|PLK1|CUL1|CDK1|TNF|VEGFA
31644	0.002337	0.022892	10	149	regulation of neurological system process	ATF1|IL10|IL1A|IFNG|EIF2AK3|CCL2|PTGS2|TNF|KLK8|EGFR
8152	0.0023653	0.023074	73	5958	metabolic process	ATF1|EPO|AHR|RBPJ|ETS1|TNF|MYSM1|TRIM28|CASP3|CASP1|IL12B|CD36|MAP3K5|IL10|SREBF1|BATF3|TBP|PARP1|FBXW7|MMP2|PRKCD|FOS|BAZ1B|RBX1|FGR|KAT2A|CREB1|NCOR1|IFNG|PIK3CA|DDIT3|IL1B|IRF1|ERG|ATF6|SQSTM1|ATF3|ATF4|HDAC2|EPAS1|CUL3|CEBPG|CREM|CUL1|PTGS2|HIF1A|KLK8|EGFR|MAPK9|MAPK8|CCL2|FYN|MAP2K6|STAT5B|TGFB1|YES1|CDKN2A|STAT1|PLK1|EIF2AK3|NFATC3|NFATC1|VEGFA|FOSL1|IL4|APC|CDK1|ATM|GRB2|NFE2L1|NOX1|TRIM33…
31349	0.0024856	0.024148	8	83	positive regulation of defense response	NFKBIA|STAT5B|IL6|IL1B|CCL5|IL12B|PTGS2|TNF
50865	0.0026801	0.02593	11	191	regulation of cell activation	IL4|IL10|STAT5B|IL6|TGFB1|IL5|IFNG|CDKN2A|CASP3|IL1B|IL12B
9725	0.0028306	0.027273	16	441	response to hormone stimulus	IL10|STAT5B|SMARCC1|TGFB1|PARP1|EPO|STAT1|FOS|PTGS2|TNF|FOSL1|IL6|IL1B|CCL5|CCL2|GRB2
302	0.00328	0.031475	8	86	response to reactive oxygen species	FOSL1|JUN|EPO|STAT1|DDIT3|CDK1|FOS|KLF2
2703	0.0034323	0.032751	7	59	regulation of leukocyte mediated immunity	IL4|IL10|STAT5B|TGFB1|IFNG|IL1B|IL12B
6915	0.0034408	0.032751	18	567	apoptosis	JUN|EPO|CDKN2A|STAT1|CUL1|EIF2AK3|AHR|TNF|NFKBIA|IL1A|IL6|MAPK8|IFNG|CASP3|IL1B|CASP1|SQSTM1|MAP3K5
50871	0.0036487	0.034589	6	37	positive regulation of B cell activation	IL4|STAT5B|IL6|TGFB1|IL5|IFNG
1934	0.0037601	0.035502	9	120	positive regulation of protein amino acid phosphorylation	IL4|IL6|TGFB1|IL5|IFNG|EPO|IL1B|TNF|VEGFA
9612	0.003861	0.036308	7	60	response to mechanical stimulus	FOSL1|JUN|STAT1|CCL2|FYN|FOS|TNF
31620	0.0042047	0.039227	4	9	regulation of fever	IL1B|CCL5|PTGS2|TNF
31622	0.0042047	0.039227	4	9	positive regulation of fever	IL1B|CCL5|PTGS2|TNF
12501	0.0044447	0.041302	18	577	programmed cell death	JUN|EPO|CDKN2A|STAT1|CUL1|EIF2AK3|AHR|TNF|NFKBIA|IL1A|IL6|MAPK8|IFNG|CASP3|IL1B|CASP1|SQSTM1|MAP3K5
31642	0.0045522	0.04197	3	3	negative regulation of myelination	IFNG|EIF2AK3|KLK8
60559	0.0045522	0.04197	3	3	positive regulation of calcidiol 1-monooxygenase activity	IFNG|IL1B|TNF
34620	0.0047433	0.043391	5	21	cellular response to unfolded protein	IFNG|DDIT3|EIF2AK3|ATF6|NFE2L2
30968	0.0047433	0.043391	5	21	endoplasmic reticulum unfolded protein response	IFNG|DDIT3|EIF2AK3|ATF6|NFE2L2
42325	0.0047718	0.043482	17	518	regulation of phosphorylation	JUN|TGFB1|EPO|CDKN2A|PRKCD|TNF|EGFR|VEGFA|IL4|IL6|IL5|IFNG|APC|CASP3|IL1B|MAP3K5|MAP2K6
31324	0.0056379	0.051176	21	786	negative regulation of cellular metabolic process	IL10|JUN|HDAC2|SPI1|SMARCC2|TGFB1|EPO|FBXW7|CDKN2A|PRKCD|EIF2AK3|RBPJ|TNF|SMARCA4|YY1|NCOR2|IL6|NCOR1|TRIM28|FOSB|TRIM33
22603	0.005824	0.052662	13	301	regulation of anatomical structure morphogenesis	ATF1|TGFB1|PTGS2|TNF|HIF1A|KLK8|VEGFA|IL1A|IL6|APC|IL1B|CCL2|FYN
2700	0.0059114	0.053248	6	40	regulation of production of molecular mediator of immune response	IL4|IL10|IL6|TGFB1|IFNG|TNF
50671	0.0060541	0.054325	7	64	positive regulation of lymphocyte proliferation	IL4|STAT5B|IL6|IL5|IFNG|IL1B|IL12B
9892	0.0065466	0.058522	22	864	negative regulation of metabolic process	IL10|JUN|HDAC2|SPI1|SMARCC2|TGFB1|EPO|FBXW7|CDKN2A|PRKCD|EIF2AK3|RBPJ|TNF|SMARCA4|YY1|NCOR2|IL6|NCOR1|TRIM28|IL1B|FOSB|TRIM33
32946	0.0067417	0.059585	7	65	positive regulation of mononuclear cell proliferation	IL4|STAT5B|IL6|IL5|IFNG|IL1B|IL12B
50708	0.0067417	0.059585	7	65	regulation of protein secretion	IL10|IL1A|IL6|TGFB1|IFNG|CASP1|TNF
42542	0.0067417	0.059585	7	65	response to hydrogen peroxide	FOSL1|JUN|EPO|STAT1|DDIT3|CDK1|KLF2
50729	0.0068813	0.060432	6	41	positive regulation of inflammatory response	STAT5B|IL6|IL1B|CCL5|PTGS2|TNF
45346	0.006966	0.060432	4	10	regulation of MHC class II biosynthetic process	IL4|IL10|HDAC2|IFNG
10660	0.006966	0.060432	4	10	regulation of muscle cell apoptosis	IFNG|CDKN2A|IL12B|RBPJ
31650	0.006966	0.060432	4	10	regulation of heat generation	IL1B|CCL5|PTGS2|TNF
31652	0.006966	0.060432	4	10	positive regulation of heat generation	IL1B|CCL5|PTGS2|TNF
70665	0.0074936	0.064533	7	66	positive regulation of leukocyte proliferation	IL4|STAT5B|IL6|IL5|IFNG|IL1B|IL12B
30162	0.0074936	0.064533	7	66	regulation of proteolysis	IL10|HDAC2|IFNG|EPO|IL1B|PLK1|TNF
32642	0.0077471	0.066472	5	23	regulation of chemokine production	IL6|IFNG|IL1B|TNF|HIF1A
10605	0.0078274	0.066917	21	802	negative regulation of macromolecule metabolic process	IL10|JUN|HDAC2|SPI1|SMARCC2|TGFB1|EPO|FBXW7|CDKN2A|PRKCD|EIF2AK3|RBPJ|TNF|SMARCA4|YY1|NCOR2|IL6|NCOR1|TRIM28|FOSB|TRIM33
80135	0.0079196	0.06746	9	131	regulation of cellular response to stress	IL1A|NCOR1|CDKN2A|IL1B|CEBPG|ATM|TNF|KLK8|MAP3K5
42102	0.0079777	0.06771	6	42	positive regulation of T cell proliferation	IL4|STAT5B|IL6|IFNG|IL1B|IL12B
32386	0.0083251	0.070404	8	97	regulation of intracellular transport	NFKBIA|IL10|TGFB1|CDKN2A|IL1B|CDK1|TNF|EGFR
51174	0.008949	0.07514	17	542	regulation of phosphorus metabolic process	JUN|TGFB1|EPO|CDKN2A|PRKCD|TNF|EGFR|VEGFA|IL4|IL6|IL5|IFNG|APC|CASP3|IL1B|MAP3K5|MAP2K6
19220	0.008949	0.07514	17	542	regulation of phosphate metabolic process	JUN|TGFB1|EPO|CDKN2A|PRKCD|TNF|EGFR|VEGFA|IL4|IL6|IL5|IFNG|APC|CASP3|IL1B|MAP3K5|MAP2K6
51241	0.0098143	0.082112	10	174	negative regulation of multicellular organismal process	IL10|IL6|IFNG|APC|EIF2AK3|PTGS2|TNF|KLK8|KLF2|VEGFA
2684	0.0099074	0.082597	12	265	positive regulation of immune system process	IL4|NFKBIA|STAT5B|IL6|TGFB1|IL5|IFNG|IL1B|IL12B|CCL2|FYN|VEGFA
51341	0.010601	0.088066	6	44	regulation of oxidoreductase activity	ATF1|IFNG|IL1B|TNF|HIF1A|EGFR
45073	0.010881	0.090075	4	11	regulation of chemokine biosynthetic process	IL6|IFNG|IL1B|TNF
16070	0.011199	0.092382	23	966	RNA metabolic process	ATF1|BATF3|TBP|PARP1|EPAS1|CDKN2A|STAT1|CEBPG|NFATC3|NFATC1|AHR|ETS1|HIF1A|VEGFA|FOSL1|KAT2A|CREB1|NCOR1|DDIT3|IRF1|ATM|NFE2L1|NFE2L2
45787	0.011245	0.092434	7	70	positive regulation of cell cycle	FOSL1|STAT5B|IL1A|IL1B|CDK1|TNF|EGFR
10552	0.011347	0.09295	8	101	positive regulation of gene-specific transcription from RNA polymerase II promoter	ATF1|NFKBIA|HDAC2|TGFB1|CREB1|IL1B|ETS1|SMARCA4
40017	0.011546	0.094251	9	137	positive regulation of locomotion	IL6|TGFB1|IL8|APC|CCL2|PTGS2|HIF1A|EGFR|VEGFA
45429	0.012082	0.098286	5	25	positive regulation of nitric oxide biosynthetic process	IFNG|IL1B|PTGS2|TNF|EGFR
10564	0.012272	0.099489	9	138	regulation of cell cycle process	IL1A|TGFB1|APC|FBXW7|CDKN2A|IL1B|ATM|TNF|SMARCA4
35556	0.014426	0.11655	21	833	intracellular signal transduction	IL10|STAT5B|CDKN2A|STAT1|EIF2AK3|TNF|TANK|EGFR|NFKBIA|MAPK9|MAPK8|IL8|IFNG|PIK3CA|IL1B|CCL2|GRB2|FYN|CD36|MAP3K5|MAP2K6
50806	0.014866	0.11969	5	26	positive regulation of synaptic transmission	IFNG|CCL2|PTGS2|TNF|EGFR
51251	0.015258	0.12243	8	105	positive regulation of lymphocyte activation	IL4|STAT5B|IL6|TGFB1|IL5|IFNG|IL1B|IL12B
2761	0.015823	0.1261	6	47	regulation of myeloid leukocyte differentiation	IL4|JUN|IL5|APC|CCL5|TNF
48520	0.015823	0.1261	6	47	positive regulation of behavior	IL6|TGFB1|IL8|CASP1|CCL2|VEGFA
45191	0.016224	0.12886	4	12	regulation of isotype switching	IL4|IL10|TGFB1|IFNG
42176	0.016456	0.13026	7	74	regulation of protein catabolic process	IL10|IFNG|APC|EPO|IL1B|PLK1|TNF
42592	0.017975	0.14116	20	773	homeostatic process	STAT5B|JUN|TGFB1|PARP1|EPO|EPAS1|CEBPG|HIF1A|VEGFA|NCOR2|IL1A|IL6|IFNG|APC|DDIT3|CASP3|IL1B|CCL5|CCL2|NOX1
34393	0.018106	0.14116	3	4	positive regulation of smooth muscle cell apoptosis	IFNG|CDKN2A|IL12B
10661	0.018106	0.14116	3	4	positive regulation of muscle cell apoptosis	IFNG|CDKN2A|IL12B
46427	0.018133	0.14116	5	27	positive regulation of JAK-STAT cascade	IL4|IL6|IL5|IFNG|EPO
2673	0.018133	0.14116	5	27	regulation of acute inflammatory response	IL6|IL1B|CCL5|PTGS2|TNF
50776	0.020865	0.16189	11	235	regulation of immune response	IL4|NFKBIA|IL10|STAT5B|IL6|TGFB1|IFNG|IL1B|IL12B|FYN|TNF
50715	0.021938	0.16911	5	28	positive regulation of cytokine secretion	IL10|IL1A|IFNG|CASP1|TNF
51353	0.021938	0.16911	5	28	positive regulation of oxidoreductase activity	ATF1|IFNG|IL1B|TNF|HIF1A
1666	0.023262	0.17839	9	149	response to hypoxia	STAT5B|TGFB1|EPO|EPAS1|MMP2|CASP1|CCL2|HIF1A|VEGFA
46006	0.023295	0.17839	4	13	regulation of activated T cell proliferation	IL4|STAT5B|CASP3|IL12B
51100	0.02355	0.17976	7	78	negative regulation of binding	NFKBIA|JUN|HDAC2|CDKN2A|DDIT3|PRKCD|CEBPG
22402	0.023673	0.18011	17	582	cell cycle process	TGFB1|FBXW7|CDKN2A|CUL3|PLK1|CUL1|EGFR|NCOR1|IL8|IFNG|APC|DDIT3|CDK1|IL12B|ATM|SKP2|MAP2K6
19538	0.02444	0.18535	41	2611	protein metabolic process	HDAC2|EPO|CUL3|CUL1|TNF|KLK8|MYSM1|EGFR|MAPK9|MAPK8|TRIM28|CASP3|CASP1|CCL2|FYN|MAP3K5|MAP2K6|TGFB1|YES1|PARP1|FBXW7|STAT1|MMP2|PRKCD|PLK1|EIF2AK3|BAZ1B|RBX1|FGR|KAT2A|CREB1|IFNG|PIK3CA|APC|IL1B|CDK1|ATM|ERG|ATF6|SQSTM1|TRIM33
51270	0.02458	0.18581	11	239	regulation of cellular component movement	STAT5B|IL6|TGFB1|APC|CCL2|RBPJ|PTGS2|ETS1|HIF1A|EGFR|VEGFA
45834	0.02588	0.19501	6	51	positive regulation of lipid metabolic process	IL1A|TGFB1|IFNG|IL1B|PTGS2|TNF
51971	0.026346	0.19789	5	29	positive regulation of transmission of nerve impulse	IFNG|CCL2|PTGS2|TNF|EGFR
7611	0.026603	0.19919	8	113	learning or memory	FOSL1|JUN|IL1B|CASP1|FYN|FOS|PTGS2|KLK8
31667	0.028864	0.21543	11	243	response to nutrient levels	SREBF1|IL1A|JUN|TGFB1|EPO|STAT1|DDIT3|IL1B|CCL2|PTGS2|SQSTM1
10558	0.030471	0.2267	17	593	negative regulation of macromolecule biosynthetic process	IL10|HDAC2|SPI1|SMARCC2|TGFB1|FBXW7|EIF2AK3|RBPJ|TNF|SMARCA4|YY1|NCOR2|IL6|NCOR1|TRIM28|FOSB|TRIM33
2696	0.032399	0.24028	8	116	positive regulation of leukocyte activation	IL4|STAT5B|IL6|TGFB1|IL5|IFNG|IL1B|IL12B
51789	0.034555	0.25546	8	117	response to protein stimulus	TGFB1|IFNG|DDIT3|EIF2AK3|CDK1|FOS|ATF6|NFE2L2
34599	0.036419	0.26841	6	54	cellular response to oxidative stress	EPO|EPAS1|CDK1|FOS|HIF1A|KLF2
60	0.037231	0.27268	5	31	protein import into nucleus, translocation	NFKBIA|JUN|TGFB1|IFNG|TNF
31646	0.037231	0.27268	5	31	positive regulation of neurological system process	IFNG|CCL2|PTGS2|TNF|EGFR
70482	0.037751	0.27563	9	158	response to oxygen levels	STAT5B|TGFB1|EPO|EPAS1|MMP2|CASP1|CCL2|HIF1A|VEGFA
1776	0.043854	0.31821	5	32	leukocyte homeostasis	STAT5B|IL6|TGFB1|IFNG|CASP3
30888	0.043854	0.31821	5	32	regulation of B cell proliferation	IL4|IL10|IL5|CDKN2A|CASP3
31347	0.044052	0.31867	9	161	regulation of defense response	NFKBIA|IL10|STAT5B|IL6|IL1B|CCL5|IL12B|PTGS2|TNF
50867	0.044438	0.32047	8	121	positive regulation of cell activation	IL4|STAT5B|IL6|TGFB1|IL5|IFNG|IL1B|IL12B
90189	0.045008	0.3226	3	5	regulation of branching involved in ureteric bud morphogenesis	ATF1|TGFB1|VEGFA
90190	0.045008	0.3226	3	5	positive regulation of branching involved in ureteric bud morphogenesis	ATF1|TGFB1|VEGFA
31327	0.045466	0.3242	17	611	negative regulation of cellular biosynthetic process	IL10|HDAC2|SPI1|SMARCC2|TGFB1|FBXW7|EIF2AK3|RBPJ|TNF|SMARCA4|YY1|NCOR2|IL6|NCOR1|TRIM28|FOSB|TRIM33
90304	0.045507	0.3242	28	1460	nucleic acid metabolic process	ATF1|EPAS1|CEBPG|AHR|RBPJ|ETS1|HIF1A|CASP3|BATF3|TBP|PARP1|CDKN2A|STAT1|NFATC3|NFATC1|FOS|BAZ1B|RBX1|VEGFA|FOSL1|KAT2A|CREB1|NCOR1|DDIT3|IRF1|ATM|NFE2L1|NFE2L2
45765	0.049188	0.34937	7	87	regulation of angiogenesis	IL1A|IL6|IL1B|CCL2|PTGS2|HIF1A|VEGFA
50731	0.055656	0.39342	6	58	positive regulation of peptidyl-tyrosine phosphorylation	IL4|IL6|IL5|IFNG|EPO|VEGFA
44057	0.055725	0.39342	12	313	regulation of system process	ATF1|IL10|IL1A|IFNG|EPAS1|IL1B|EIF2AK3|CCL2|PTGS2|TNF|KLK8|EGFR
9890	0.05641	0.39707	17	621	negative regulation of biosynthetic process	IL10|HDAC2|SPI1|SMARCC2|TGFB1|FBXW7|EIF2AK3|RBPJ|TNF|SMARCA4|YY1|NCOR2|IL6|NCOR1|TRIM28|FOSB|TRIM33
45599	0.058238	0.40871	4	16	negative regulation of fat cell differentiation	NCOR2|IL6|TGFB1|TNF
50727	0.061703	0.43174	7	90	regulation of inflammatory response	IL10|STAT5B|IL6|IL1B|CCL5|PTGS2|TNF
30335	0.067514	0.471	8	128	positive regulation of cell migration	IL6|TGFB1|APC|CCL2|PTGS2|HIF1A|EGFR|VEGFA
9314	0.06852	0.4766	10	216	response to radiation	IL1A|MAPK8|TGFB1|CASP3|IL1B|IL12B|CCL2|ATM|FOS|EGFR
19915	0.075703	0.52501	4	17	lipid storage	STAT5B|IL1B|CD36|TNF
46425	0.080095	0.55059	5	36	regulation of JAK-STAT cascade	IL4|IL6|IL5|IFNG|EPO
50707	0.080095	0.55059	5	36	regulation of cytokine secretion	IL10|IL1A|IFNG|CASP1|TNF
6984	0.080095	0.55059	5	36	ER-nucleus signaling pathway	IFNG|DDIT3|EIF2AK3|ATF6|NFE2L2
30217	0.082431	0.565	6	62	T cell differentiation	STAT5B|TGFB1|APC|IRF1|IL12B|RELB
44267	0.088924	0.60534	35	2153	cellular protein metabolic process	HDAC2|CUL3|CUL1|TNF|MYSM1|EGFR|MAPK9|MAPK8|TRIM28|CCL2|FYN|MAP3K5|MAP2K6|TGFB1|YES1|PARP1|FBXW7|STAT1|PRKCD|PLK1|EIF2AK3|BAZ1B|RBX1|FGR|KAT2A|CREB1|IFNG|PIK3CA|IL1B|CDK1|ATM|ERG|ATF6|SQSTM1|TRIM33
43620	0.089507	0.60534	3	6	regulation of transcription in response to stress	EPAS1|DDIT3|HIF1A
10893	0.089507	0.60534	3	6	positive regulation of steroid biosynthetic process	IL1A|IFNG|TNF
31641	0.089507	0.60534	3	6	regulation of myelination	IFNG|EIF2AK3|KLK8
19216	0.089604	0.60534	8	133	regulation of lipid metabolic process	STAT5B|IL1A|TGFB1|IFNG|IL1B|EIF2AK3|PTGS2|TNF
45639	0.09204	0.61824	5	37	positive regulation of myeloid cell differentiation	JUN|IL5|CCL5|ETS1|HIF1A
45862	0.09204	0.61824	5	37	positive regulation of proteolysis	HDAC2|IFNG|IL1B|PLK1|TNF
30593	0.096751	0.64804	4	18	neutrophil chemotaxis	IL8|IFNG|IL1B|CCL2
51049	0.097456	0.65091	15	513	regulation of transport	ATF1|IL10|TGFB1|CDKN2A|PTGS2|TNF|EGFR|NFKBIA|IL1A|IL6|CREB1|IFNG|IL1B|CDK1|CASP1
7049	0.10397	0.69243	19	794	cell cycle	TGFB1|FBXW7|CDKN2A|CUL3|PLK1|CUL1|AHR|EGFR|NCOR1|DMTF1|IL8|IFNG|APC|DDIT3|CDK1|IL12B|ATM|SKP2|MAP2K6
42306	0.10869	0.71978	6	65	regulation of protein import into nucleus	NFKBIA|IL10|TGFB1|CDK1|TNF|EGFR
43392	0.10869	0.71978	6	65	negative regulation of DNA binding	NFKBIA|JUN|HDAC2|CDKN2A|DDIT3|CEBPG
7166	0.12325	0.81396	25	1280	cell surface receptor linked signaling pathway	RBPJ|TNF|EGFR|FGF20|IL12B|CCL2|FYN|STAT5B|SMARCC1|JUN|TGFB1|STAT1|EIF2AK3|FOS|VEGFA|NFKBIA|IL1A|IL6|IL5|CREB1|IL8|IFNG|APC|IL1B|GRB2
51969	0.12389	0.81587	8	139	regulation of transmission of nerve impulse	ATF1|IFNG|EIF2AK3|CCL2|PTGS2|TNF|KLK8|EGFR
51276	0.12823	0.84208	15	525	chromosome organization	SMARCC1|HDAC2|SMARCC2|PARP1|FBXW7|CHD6|BAZ1A|BAZ1B|MYSM1|SMARCA4|KAT2A|NCOR1|APC|HIST3H3|CDK1
51781	0.13639	0.89318	5	40	positive regulation of cell division	IL1A|TGFB1|APC|IL1B|VEGFA
9615	0.14481	0.94569	8	142	response to virus	FOSL1|FGR|IL6|IFNG|STAT1|CCL5|CCL4|TNF
45646	0.15137	0.98576	4	20	regulation of erythrocyte differentiation	STAT5B|SPI1|ETS1|HIF1A
7167	0.15305	0.98964	12	346	enzyme linked receptor protein signaling pathway	STAT5B|SMARCC1|JUN|TGFB1|CREB1|FGF20|EIF2AK3|CCL2|GRB2|FOS|EGFR|VEGFA
45785	0.15382	0.98964	6	69	positive regulation of cell adhesion	IFNG|APC|IL1B|IL12B|CD36|TNF
50795	0.15382	0.98964	6	69	regulation of behavior	IL6|TGFB1|IL8|CASP1|CCL2|VEGFA
50921	0.15438	0.98964	5	41	positive regulation of chemotaxis	IL6|TGFB1|IL8|CCL2|VEGFA
45084	0.15575	0.98964	3	7	positive regulation of interleukin-12 biosynthetic process	IFNG|IRF1|REL
45348	0.15575	0.98964	3	7	positive regulation of MHC class II biosynthetic process	IL4|IL10|IFNG
30889	0.15575	0.98964	3	7	negative regulation of B cell proliferation	IL10|CDKN2A|CASP3
60558	0.15575	0.98964	3	7	regulation of calcidiol 1-monooxygenase activity	IFNG|IL1B|TNF
[truncated: 65 more columns]

## Sheet: Supplementary table (S3)
Selected ontology file : bundle://134.0:1/data/GO_Biological_Process
Selected annotation file : bundle://134.0:1/data/H_sapiens_default
Discarded evidence codes :
Overrepresentation
Selected statistical test : Hypergeometric test
Selected correction : Benjamini & Hochberg False Discovery Rate (FDR) correction
Selected significance level : 0.05
Testing option : Use whole annotation as reference set
The selected cluster :
ATF1	SPI1	EPO	AHR	ELK1	ELK4	SPIB	TRIM28	MYB	SNAPC4	CD36	MAP3K5	BATF3	TBP	MMP2	FOS	ETV4	FGR	MAF	DMTF1	DDIT3	IRF1	ATF3	UGT2B7	ATF4	NFAT5	EPAS1	CEBPG	CREM	TAF1L	PTGS2	HIF1A	MAPK9	MAPK8	CCL5	MAP2K6	XBP1	JUND	CCL20	CDKN2A	EIF2AK3	NFATC3	NFATC1	FOSL2	NFATC4	VEGFA	FOSL1	APC	IL8	NICKEL
No annotations were retrieved for the following entities:
NICKEL	SUBSULF.
GO-ID	p-value	corr p-value	x	n	Description	Genes in test set
6355	1.8396e-18	2.4871e-15	39	1804	regulation of transcription, DNA-dependent	ATF1|NFAT5|SPI1|EPO|EPAS1|CEBPG|CREM|TAF1L|AHR|ELK1|ETS1|HIF1A|ETS2|ELK4|SPIB|TRIM28|MYB|BATF3|XBP1|TBP|JUND|NFATC3|NFATC1|FOS|ETV4|FOSL2|NFATC4|VEGFA|FOSL1|MAF|DMTF1|DDIT3|IRF1|REL|FOSB|ATF3|ATF4|NFE2L2|TAF1
51252	4.9387e-18	3.3385e-15	39	1853	regulation of RNA metabolic process	ATF1|NFAT5|SPI1|EPO|EPAS1|CEBPG|CREM|TAF1L|AHR|ELK1|ETS1|HIF1A|ETS2|ELK4|SPIB|TRIM28|MYB|BATF3|XBP1|TBP|JUND|NFATC3|NFATC1|FOS|ETV4|FOSL2|NFATC4|VEGFA|FOSL1|MAF|DMTF1|DDIT3|IRF1|REL|FOSB|ATF3|ATF4|NFE2L2|TAF1
60255	1.1708e-15	5.2762e-13	46	3373	regulation of macromolecule metabolic process	ATF1|NFAT5|SPI1|EPO|EPAS1|CEBPG|CREM|TAF1L|AHR|ELK1|ETS1|HIF1A|ETS2|ELK4|SPIB|MAPK9|TRIM28|MYB|SNAPC4|MAP3K5|BATF3|XBP1|TBP|JUND|CDKN2A|EIF2AK3|NFATC3|NFATC1|FOS|ETV4|FOSL2|NFATC4|VEGFA|FOSL1|MAF|DMTF1|APC|DDIT3|IRF1|REL|FOSB|ATF3|NOX1|ATF4|NFE2L2|TAF1
9889	2.553e-15	8.5674e-13	44	3042	regulation of biosynthetic process	ATF1|NFAT5|SPI1|EPO|EPAS1|CEBPG|CREM|TAF1L|AHR|PTGS2|ELK1|ETS1|HIF1A|ETS2|ELK4|SPIB|TRIM28|MYB|SNAPC4|BATF3|XBP1|TBP|JUND|CDKN2A|EIF2AK3|NFATC3|NFATC1|FOS|ETV4|FOSL2|NFATC4|VEGFA|FOSL1|MAF|DMTF1|DDIT3|IRF1|REL|FOSB|ATF3|NOX1|ATF4|NFE2L2|TAF1
10556	3.1684e-15	8.5674e-13	43	2874	regulation of macromolecule biosynthetic process	ATF1|NFAT5|SPI1|EPO|EPAS1|CEBPG|CREM|TAF1L|AHR|ELK1|ETS1|HIF1A|ETS2|ELK4|SPIB|TRIM28|MYB|SNAPC4|BATF3|XBP1|TBP|JUND|CDKN2A|EIF2AK3|NFATC3|NFATC1|FOS|ETV4|FOSL2|NFATC4|VEGFA|FOSL1|MAF|DMTF1|DDIT3|IRF1|REL|FOSB|ATF3|NOX1|ATF4|NFE2L2|TAF1
19222	4.4729e-15	1.0079e-12	48	3915	regulation of metabolic process	ATF1|NFAT5|SPI1|EPO|EPAS1|CEBPG|CREM|TAF1L|AHR|PTGS2|ELK1|ETS1|HIF1A|ETS2|ELK4|SPIB|MAPK9|TRIM28|MYB|SNAPC4|MAP3K5|MAP2K6|BATF3|XBP1|TBP|JUND|CDKN2A|EIF2AK3|NFATC3|NFATC1|FOS|ETV4|FOSL2|NFATC4|VEGFA|FOSL1|MAF|DMTF1|APC|DDIT3|IRF1|REL|FOSB|ATF3|NOX1|ATF4|NFE2L2|TAF1
10468	6.3876e-15	1.2337e-12	43	2925	regulation of gene expression	ATF1|NFAT5|SPI1|EPO|EPAS1|CEBPG|CREM|TAF1L|AHR|ELK1|ETS1|HIF1A|ETS2|ELK4|SPIB|MAPK9|TRIM28|MYB|SNAPC4|BATF3|XBP1|TBP|JUND|CDKN2A|EIF2AK3|NFATC3|NFATC1|FOS|ETV4|FOSL2|NFATC4|VEGFA|FOSL1|MAF|DMTF1|DDIT3|IRF1|REL|FOSB|ATF3|ATF4|NFE2L2|TAF1
45449	1.1941e-14	2.0181e-12	41	2619	regulation of transcription	ATF1|NFAT5|SPI1|EPO|EPAS1|CEBPG|CREM|TAF1L|AHR|ELK1|ETS1|HIF1A|ETS2|ELK4|SPIB|TRIM28|MYB|SNAPC4|BATF3|XBP1|TBP|JUND|CDKN2A|NFATC3|NFATC1|FOS|ETV4|FOSL2|NFATC4|VEGFA|FOSL1|MAF|DMTF1|DDIT3|IRF1|REL|FOSB|ATF3|ATF4|NFE2L2|TAF1
31326	2.2162e-14	3.3293e-12	43	3018	regulation of cellular biosynthetic process	ATF1|NFAT5|SPI1|EPO|EPAS1|CEBPG|CREM|TAF1L|AHR|PTGS2|ELK1|ETS1|HIF1A|ETS2|ELK4|SPIB|TRIM28|MYB|SNAPC4|BATF3|XBP1|TBP|JUND|CDKN2A|EIF2AK3|NFATC3|NFATC1|FOS|ETV4|FOSL2|NFATC4|VEGFA|FOSL1|MAF|DMTF1|DDIT3|IRF1|REL|FOSB|ATF3|ATF4|NFE2L2|TAF1
51171	2.8425e-14	3.843e-12	43	3037	regulation of nitrogen compound metabolic process	ATF1|NFAT5|SPI1|EPO|EPAS1|CEBPG|CREM|TAF1L|AHR|PTGS2|ELK1|ETS1|HIF1A|ETS2|ELK4|SPIB|TRIM28|MYB|SNAPC4|BATF3|XBP1|TBP|JUND|CDKN2A|NFATC3|NFATC1|FOS|ETV4|FOSL2|NFATC4|VEGFA|FOSL1|MAF|DMTF1|APC|DDIT3|IRF1|REL|FOSB|ATF3|ATF4|NFE2L2|TAF1
31323	8.8529e-14	1.0881e-11	46	3732	regulation of cellular metabolic process	ATF1|NFAT5|SPI1|EPO|EPAS1|CEBPG|CREM|TAF1L|AHR|PTGS2|ELK1|ETS1|HIF1A|ETS2|ELK4|SPIB|TRIM28|MYB|SNAPC4|MAP3K5|MAP2K6|BATF3|XBP1|TBP|JUND|CDKN2A|EIF2AK3|NFATC3|NFATC1|FOS|ETV4|FOSL2|NFATC4|VEGFA|FOSL1|MAF|DMTF1|APC|DDIT3|IRF1|REL|FOSB|ATF3|ATF4|NFE2L2|TAF1
80090	1.2449e-13	1.4026e-11	45	3550	regulation of primary metabolic process	ATF1|NFAT5|SPI1|EPO|EPAS1|CEBPG|CREM|TAF1L|AHR|PTGS2|ELK1|ETS1|HIF1A|ETS2|ELK4|SPIB|TRIM28|MYB|SNAPC4|MAP3K5|BATF3|XBP1|TBP|JUND|CDKN2A|EIF2AK3|NFATC3|NFATC1|FOS|ETV4|FOSL2|NFATC4|VEGFA|FOSL1|MAF|DMTF1|APC|DDIT3|IRF1|REL|FOSB|ATF3|ATF4|NFE2L2|TAF1
48522	1.4409e-13	1.4623e-11	36	2002	positive regulation of cellular process	ATF1|SPI1|EPO|EPAS1|CEBPG|AHR|PTGS2|ELK1|ETS1|HIF1A|ETS2|MAPK9|MAPK8|TRIM28|CCL5|CD36|MAP3K5|MAP2K6|TBP|JUND|CDKN2A|EIF2AK3|NFATC3|FOS|FOSL2|VEGFA|FOSL1|APC|DDIT3|IRF1|REL|ATF3|NOX1|ATF4|NFE2L2|TAF1
6366	1.5142e-13	1.4623e-11	17	231	transcription from RNA polymerase II promoter	NFAT5|BATF3|TBP|EPAS1|NFATC3|NFATC1|AHR|ETS1|HIF1A|NFATC4|FOSL1|MAF|DDIT3|IRF1|SNAPC4|NFE2L2|TAF1
6351	3.2197e-13	2.902e-11	18	291	transcription, DNA-dependent	NFAT5|BATF3|TBP|EPAS1|NFATC3|TAF1L|NFATC1|AHR|ETS1|HIF1A|NFATC4|FOSL1|MAF|DDIT3|IRF1|SNAPC4|NFE2L2|TAF1
48518	3.5171e-13	2.9719e-11	37	2206	positive regulation of biological process	ATF1|SPI1|EPO|EPAS1|CEBPG|AHR|PTGS2|ELK1|ETS1|HIF1A|ETS2|MAPK9|MAPK8|TRIM28|CCL5|CD36|MAP3K5|MAP2K6|TBP|JUND|CDKN2A|EIF2AK3|NFATC3|FOS|FOSL2|VEGFA|FOSL1|APC|IL8|DDIT3|IRF1|REL|ATF3|NOX1|ATF4|NFE2L2|TAF1
32774	4.1038e-13	3.2638e-11	18	295	RNA biosynthetic process	NFAT5|BATF3|TBP|EPAS1|NFATC3|TAF1L|NFATC1|AHR|ETS1|HIF1A|NFATC4|FOSL1|MAF|DDIT3|IRF1|SNAPC4|NFE2L2|TAF1
9891	1.0316e-12	7.7488e-11	24	730	positive regulation of biosynthetic process	ATF1|SPI1|TBP|EPO|EPAS1|CEBPG|NFATC3|AHR|FOS|PTGS2|ELK1|ETS1|HIF1A|ETS2|VEGFA|FOSL1|TRIM28|DDIT3|IRF1|REL|NOX1|ATF4|NFE2L2|TAF1
19219	2.2323e-12	1.5885e-10	41	3011	regulation of nucleobase, nucleoside, nucleotide and nucleic acid metabolic process	ATF1|NFAT5|SPI1|EPO|EPAS1|CEBPG|CREM|TAF1L|AHR|ELK1|ETS1|HIF1A|ETS2|ELK4|SPIB|TRIM28|MYB|SNAPC4|BATF3|XBP1|TBP|JUND|CDKN2A|NFATC3|NFATC1|FOS|ETV4|FOSL2|NFATC4|VEGFA|FOSL1|MAF|DMTF1|DDIT3|IRF1|REL|FOSB|ATF3|ATF4|NFE2L2|TAF1
10557	2.4818e-12	1.6777e-10	23	674	positive regulation of macromolecule biosynthetic process	ATF1|SPI1|TBP|EPO|EPAS1|CEBPG|NFATC3|AHR|FOS|ELK1|ETS1|HIF1A|ETS2|VEGFA|FOSL1|TRIM28|DDIT3|IRF1|REL|NOX1|ATF4|NFE2L2|TAF1
51173	2.6472e-12	1.7043e-10	23	676	positive regulation of nitrogen compound metabolic process	ATF1|SPI1|TBP|EPO|EPAS1|CEBPG|NFATC3|AHR|FOS|PTGS2|ELK1|ETS1|HIF1A|ETS2|VEGFA|FOSL1|TRIM28|DDIT3|IRF1|REL|ATF4|NFE2L2|TAF1
10628	3.255e-12	2.0004e-10	22	602	positive regulation of gene expression	ATF1|SPI1|TBP|EPO|EPAS1|NFATC3|AHR|FOS|ELK1|ETS1|HIF1A|ETS2|VEGFA|FOSL1|MAPK9|TRIM28|DDIT3|IRF1|REL|ATF4|NFE2L2|TAF1
6350	6.5128e-12	3.8284e-10	18	345	transcription	NFAT5|BATF3|TBP|EPAS1|NFATC3|TAF1L|NFATC1|AHR|ETS1|HIF1A|NFATC4|FOSL1|MAF|DDIT3|IRF1|SNAPC4|NFE2L2|TAF1
31328	1.0096e-11	5.6874e-10	23	719	positive regulation of cellular biosynthetic process	ATF1|SPI1|TBP|EPO|EPAS1|CEBPG|NFATC3|AHR|FOS|PTGS2|ELK1|ETS1|HIF1A|ETS2|VEGFA|FOSL1|TRIM28|DDIT3|IRF1|REL|ATF4|NFE2L2|TAF1
9893	1.5051e-11	8.1395e-10	26	1017	positive regulation of metabolic process	ATF1|SPI1|EPO|EPAS1|CEBPG|AHR|PTGS2|ELK1|ETS1|HIF1A|ETS2|MAPK9|TRIM28|TBP|NFATC3|FOS|VEGFA|FOSL1|APC|DDIT3|IRF1|REL|NOX1|ATF4|NFE2L2|TAF1
45941	1.8229e-11	9.4624e-10	21	574	positive regulation of transcription	ATF1|SPI1|TBP|EPO|EPAS1|NFATC3|AHR|FOS|ELK1|ETS1|HIF1A|ETS2|VEGFA|FOSL1|TRIM28|DDIT3|IRF1|REL|ATF4|NFE2L2|TAF1
45935	1.8897e-11	9.4624e-10	22	655	positive regulation of nucleobase, nucleoside, nucleotide and nucleic acid metabolic process	ATF1|SPI1|TBP|EPO|EPAS1|CEBPG|NFATC3|AHR|FOS|ELK1|ETS1|HIF1A|ETS2|VEGFA|FOSL1|TRIM28|DDIT3|IRF1|REL|ATF4|NFE2L2|TAF1
50794	2.6067e-11	1.2474e-09	53	6219	regulation of cellular process	ATF1|SPI1|EPO|AHR|ELK1|ETS1|ETS2|ELK4|SPIB|TRIM28|MYB|SNAPC4|CD36|MAP3K5|BATF3|TBP|FOS|ETV4|MAF|DMTF1|DDIT3|IRF1|ATF3|ATF4|NFAT5|EPAS1|CEBPG|CREM|TAF1L|PTGS2|HIF1A|MAPK9|MAPK8|CCL5|MAP2K6|XBP1|JUND|CCL20|CDKN2A|EIF2AK3|NFATC3|NFATC1|FOSL2|NFATC4|VEGFA|FOSL1|APC|IL8|REL|FOSB|NOX1|NFE2L2|TAF1
10604	2.6757e-11	1.2474e-09	25	940	positive regulation of macromolecule metabolic process	ATF1|SPI1|EPO|EPAS1|CEBPG|AHR|ELK1|ETS1|HIF1A|ETS2|MAPK9|TRIM28|TBP|NFATC3|FOS|VEGFA|FOSL1|APC|DDIT3|IRF1|REL|NOX1|ATF4|NFE2L2|TAF1
45893	2.7277e-10	1.2055e-08	19	499	positive regulation of transcription, DNA-dependent	ATF1|SPI1|EPO|EPAS1|NFATC3|AHR|FOS|ELK1|ETS1|HIF1A|ETS2|VEGFA|FOSL1|TRIM28|IRF1|REL|ATF4|NFE2L2|TAF1
6357	2.7641e-10	1.2055e-08	22	746	regulation of transcription from RNA polymerase II promoter	ATF1|SPI1|JUND|EPO|EPAS1|CEBPG|NFATC3|TAF1L|AHR|FOS|ELK1|ETS1|HIF1A|FOSL2|VEGFA|SPIB|FOSL1|TRIM28|IRF1|FOSB|ATF4|TAF1
51254	3.3841e-10	1.4242e-08	19	505	positive regulation of RNA metabolic process	ATF1|SPI1|EPO|EPAS1|NFATC3|AHR|FOS|ELK1|ETS1|HIF1A|ETS2|VEGFA|FOSL1|TRIM28|IRF1|REL|ATF4|NFE2L2|TAF1
50789	3.4761e-10	1.4242e-08	53	6549	regulation of biological process	ATF1|SPI1|EPO|AHR|ELK1|ETS1|ETS2|ELK4|SPIB|TRIM28|MYB|SNAPC4|CD36|MAP3K5|BATF3|TBP|FOS|ETV4|MAF|DMTF1|DDIT3|IRF1|ATF3|ATF4|NFAT5|EPAS1|CEBPG|CREM|TAF1L|PTGS2|HIF1A|MAPK9|MAPK8|CCL5|MAP2K6|XBP1|JUND|CCL20|CDKN2A|EIF2AK3|NFATC3|NFATC1|FOSL2|NFATC4|VEGFA|FOSL1|APC|IL8|REL|FOSB|NOX1|NFE2L2|TAF1
31325	5.3194e-09	2.1152e-07	23	965	positive regulation of cellular metabolic process	ATF1|SPI1|TBP|EPO|EPAS1|CEBPG|NFATC3|AHR|FOS|PTGS2|ELK1|ETS1|HIF1A|ETS2|VEGFA|FOSL1|TRIM28|DDIT3|IRF1|REL|ATF4|NFE2L2|TAF1
65007	6.1396e-09	2.3717e-07	53	6938	biological regulation	ATF1|SPI1|EPO|AHR|ELK1|ETS1|ETS2|ELK4|SPIB|TRIM28|MYB|SNAPC4|CD36|MAP3K5|BATF3|TBP|FOS|ETV4|MAF|DMTF1|DDIT3|IRF1|ATF3|ATF4|NFAT5|EPAS1|CEBPG|CREM|TAF1L|PTGS2|HIF1A|MAPK9|MAPK8|CCL5|MAP2K6|XBP1|JUND|CCL20|CDKN2A|EIF2AK3|NFATC3|NFATC1|FOSL2|NFATC4|VEGFA|FOSL1|APC|IL8|REL|FOSB|NOX1|NFE2L2|TAF1
16070	5.0748e-08	1.9059e-06	22	966	RNA metabolic process	ATF1|NFAT5|BATF3|TBP|EPAS1|CDKN2A|CEBPG|NFATC3|TAF1L|NFATC1|AHR|ETS1|HIF1A|NFATC4|VEGFA|FOSL1|MAF|DDIT3|IRF1|SNAPC4|NFE2L2|TAF1
6950	1.3314e-07	4.865e-06	28	1772	response to stress	EPO|EPAS1|CEBPG|AHR|PTGS2|HIF1A|MAPK9|MAPK8|CCL5|CD36|MAP3K5|MAP2K6|CCL20|MMP2|EIF2AK3|NFATC3|FOS|NFATC4|VEGFA|FGR|FOSL1|APC|IL8|DDIT3|NOX1|ATF4|NFE2L2|TAF1
90304	2.3459e-05	0.00083465	23	1460	nucleic acid metabolic process	ATF1|NFAT5|BATF3|TBP|EPAS1|CDKN2A|CEBPG|NFATC3|TAF1L|NFATC1|AHR|FOS|ETS1|HIF1A|NFATC4|VEGFA|FOSL1|MAF|DDIT3|IRF1|SNAPC4|NFE2L2|TAF1
45944	2.845e-05	0.00098627	13	387	positive regulation of transcription from RNA polymerase II promoter	ATF1|EPAS1|NFATC3|AHR|FOS|ELK1|ETS1|HIF1A|VEGFA|FOSL1|IRF1|ATF4|TAF1
34645	8.0146e-05	0.0027089	19	1033	cellular macromolecule biosynthetic process	NFAT5|BATF3|TBP|EPO|EPAS1|NFATC3|TAF1L|NFATC1|AHR|ETS1|HIF1A|NFATC4|FOSL1|MAF|DDIT3|IRF1|SNAPC4|NFE2L2|TAF1
30968	0.00010359	0.0077693	4	21	endoplasmic reticulum unfolded protein response	DDIT3|EIF2AK3|ATF6|NFE2L2
34620	0.00010359	0.0077693	4	21	cellular response to unfolded protein	DDIT3|EIF2AK3|ATF6|NFE2L2
9059	0.00011138	0.003673	19	1054	macromolecule biosynthetic process	NFAT5|BATF3|TBP|EPO|EPAS1|NFATC3|TAF1L|NFATC1|AHR|ETS1|HIF1A|NFATC4|FOSL1|MAF|DDIT3|IRF1|SNAPC4|NFE2L2|TAF1
42221	0.00014638	0.004712	22	1464	response to chemical stimulus	ATF1|EPO|EPAS1|CCL20|MMP2|EIF2AK3|AHR|FOS|PTGS2|ETS1|HIF1A|VEGFA|FOSL1|MAPK9|MAPK8|APC|IL8|DDIT3|CCL5|CCL27|MAP2K6|NFE2L2
6139	0.00021493	0.0067577	24	1786	nucleobase, nucleoside, nucleotide and nucleic acid metabolic process	ATF1|NFAT5|BATF3|TBP|EPAS1|CDKN2A|CEBPG|NFATC3|TAF1L|NFATC1|AHR|FOS|ETS1|HIF1A|NFATC4|VEGFA|FOSL1|MAF|DDIT3|IRF1|SNAPC4|NOX1|NFE2L2|TAF1
51716	0.00025602	0.0078667	18	987	cellular response to stimulus	EPO|EPAS1|EIF2AK3|FOS|HIF1A|VEGFA|FOSL1|MAPK9|MAPK8|APC|IL8|DDIT3|CCL5|MAP3K5|ATF4|MAP2K6|NFE2L2|TAF1
51239	0.00082162	0.024685	18	1065	regulation of multicellular organismal process	ATF1|SPI1|JUND|EPO|EPAS1|CDKN2A|CEBPG|EIF2AK3|PTGS2|ETS1|HIF1A|VEGFA|APC|IRF1|CCL5|REL|NOX1|NFE2L2
34641	0.00086974	0.025563	25	2078	cellular nitrogen compound metabolic process	ATF1|NFAT5|EPAS1|CEBPG|TAF1L|AHR|ETS1|HIF1A|SNAPC4|BATF3|TBP|CDKN2A|NFATC3|NFATC1|FOS|NFATC4|VEGFA|FOSL1|MAF|DDIT3|IRF1|NOX1|ATF4|NFE2L2|TAF1
33554	0.00096073	0.027636	14	619	cellular response to stress	EPO|EPAS1|EIF2AK3|FOS|HIF1A|MAPK9|MAPK8|APC|DDIT3|MAP3K5|ATF4|MAP2K6|NFE2L2|TAF1
51094	0.00099704	0.028083	11	347	positive regulation of developmental process	ATF1|MAPK9|JUND|APC|EPO|CCL5|CD36|PTGS2|ETS1|HIF1A|VEGFA
6355	0.00063672	0.055237	8	1806	regulation of transcription, DNA-dependent	NFE2|MAFG|MAFF|NFE2L3|MAFK|BACH1|BACH2|NFE2L1
51252	0.0007891	0.055237	8	1855	regulation of RNA metabolic process	NFE2|MAFG|MAFF|NFE2L3|MAFK|BACH1|BACH2|NFE2L1
45449	0.01259	0.58755	8	2621	regulation of transcription	NFE2|MAFG|MAFF|NFE2L3|MAFK|BACH1|BACH2|NFE2L1
42981	0.001241	0.034241	16	851	regulation of apoptosis	ATF1|EPO|CDKN2A|CEBPG|EIF2AK3|PTGS2|ELK1|ETS1|VEGFA|FOSL1|MAPK9|MAPK8|APC|DDIT3|MAP3K5|MAP2K6
43067	0.0014109	0.038151	16	859	regulation of programmed cell death	ATF1|EPO|CDKN2A|CEBPG|EIF2AK3|PTGS2|ELK1|ETS1|VEGFA|FOSL1|MAPK9|MAPK8|APC|DDIT3|MAP3K5|MAP2K6
10941	0.0015768	0.0418	16	866	regulation of cell death	ATF1|EPO|CDKN2A|CEBPG|EIF2AK3|PTGS2|ELK1|ETS1|VEGFA|FOSL1|MAPK9|MAPK8|APC|DDIT3|MAP3K5|MAP2K6
50896	0.0018518	0.048147	33	3631	response to stimulus	ATF1|EPO|EPAS1|CEBPG|AHR|PTGS2|ETS1|HIF1A|MAPK9|MAPK8|CCL5|CD36|MAP3K5|MAP2K6|XBP1|CCL20|MMP2|EIF2AK3|NFATC3|FOS|NFATC4|VEGFA|FGR|FOSL1|APC|IL8|DDIT3|FOSB|CCL27|NOX1|ATF4|NFE2L2|TAF1
44249	0.0018965	0.048378	22	1687	cellular biosynthetic process	NFAT5|BATF3|TBP|EPO|EPAS1|NFATC3|TAF1L|NFATC1|AHR|PTGS2|ETS1|HIF1A|NFATC4|FOSL1|MAF|DDIT3|IRF1|SNAPC4|ATF3|ATF4|NFE2L2|TAF1
10467	0.0019937	0.049916	19	1262	gene expression	NFAT5|BATF3|TBP|EPAS1|CDKN2A|NFATC3|TAF1L|NFATC1|AHR|ETS1|HIF1A|NFATC4|FOSL1|MAF|DDIT3|IRF1|SNAPC4|NFE2L2|TAF1
6807	0.0025995	0.063901	25	2196	nitrogen compound metabolic process	ATF1|NFAT5|EPAS1|CEBPG|TAF1L|AHR|ETS1|HIF1A|SNAPC4|BATF3|TBP|CDKN2A|NFATC3|NFATC1|FOS|NFATC4|VEGFA|FOSL1|MAF|DDIT3|IRF1|NOX1|ATF4|NFE2L2|TAF1
50793	0.0029794	0.071931	15	790	regulation of developmental process	ATF1|SPI1|JUND|EPO|CDKN2A|EIF2AK3|PTGS2|ETS1|HIF1A|VEGFA|MAPK9|APC|CCL5|CD36|NFE2L2
44260	0.0032061	0.076047	32	3508	cellular macromolecule metabolic process	ATF1|NFAT5|EPO|EPAS1|CEBPG|TAF1L|AHR|ETS1|HIF1A|MAPK9|MAPK8|TRIM28|SNAPC4|CD36|MAP3K5|MAP2K6|BATF3|TBP|CDKN2A|EIF2AK3|NFATC3|NFATC1|FOS|NFATC4|VEGFA|FGR|FOSL1|MAF|DDIT3|IRF1|NFE2L2|TAF1
44238	0.0035415	0.082553	40	5288	primary metabolic process	ATF1|NFAT5|EPO|EPAS1|CEBPG|CREM|TAF1L|AHR|PTGS2|ETS1|HIF1A|MAPK9|MAPK8|TRIM28|SNAPC4|CD36|MAP3K5|MAP2K6|BATF3|TBP|CDKN2A|MMP2|EIF2AK3|NFATC3|NFATC1|FOS|NFATC4|VEGFA|FGR|FOSL1|MAF|APC|DDIT3|IRF1|ATF3|UGT2B7|NOX1|ATF4|NFE2L2|TAF1
9058	0.0057519	0.13181	22	1797	biosynthetic process	NFAT5|BATF3|TBP|EPO|EPAS1|NFATC3|TAF1L|NFATC1|AHR|PTGS2|ETS1|HIF1A|NFATC4|FOSL1|MAF|DDIT3|IRF1|SNAPC4|ATF3|ATF4|NFE2L2|TAF1
43170	0.0060806	0.13702	34	4017	macromolecule metabolic process	ATF1|NFAT5|EPO|EPAS1|CEBPG|TAF1L|AHR|ETS1|HIF1A|MAPK9|MAPK8|TRIM28|SNAPC4|CD36|MAP3K5|MAP2K6|BATF3|TBP|CDKN2A|MMP2|EIF2AK3|NFATC3|NFATC1|FOS|NFATC4|VEGFA|FGR|FOSL1|MAF|APC|DDIT3|IRF1|NFE2L2|TAF1
6979	0.0062236	0.13794	8	184	response to oxidative stress	FOSL1|EPO|EPAS1|DDIT3|CCL5|FOS|PTGS2|HIF1A
32844	0.0092233	0.20113	7	133	regulation of homeostatic process	SPI1|CCL5|EIF2AK3|PTGS2|ETS1|HIF1A|VEGFA
43065	0.011114	0.23796	11	442	positive regulation of apoptosis	FOSL1|MAPK9|MAPK8|APC|CDKN2A|DDIT3|CEBPG|PTGS2|ETS1|MAP3K5|MAP2K6
43193	0.011264	0.23796	7	137	positive regulation of gene-specific transcription	ATF1|SPI1|TRIM28|EPO|ETS1|HIF1A|TAF1
43068	0.011876	0.24394	11	445	positive regulation of programmed cell death	FOSL1|MAPK9|MAPK8|APC|CDKN2A|DDIT3|CEBPG|PTGS2|ETS1|MAP3K5|MAP2K6
43620	0.011908	0.24394	3	6	regulation of transcription in response to stress	EPAS1|DDIT3|HIF1A
10942	0.012962	0.26156	11	449	positive regulation of cell death	FOSL1|MAPK9|MAPK8|APC|CDKN2A|DDIT3|CEBPG|PTGS2|ETS1|MAP3K5|MAP2K6
70887	0.034205	0.68008	10	399	cellular response to chemical stimulus	IL8|EPO|EPAS1|DDIT3|CCL5|EIF2AK3|FOS|HIF1A|VEGFA|NFE2L2
44237	0.035907	0.70357	37	4989	cellular metabolic process	ATF1|NFAT5|EPO|EPAS1|CEBPG|CREM|TAF1L|AHR|PTGS2|ETS1|HIF1A|MAPK9|MAPK8|TRIM28|SNAPC4|CD36|MAP3K5|MAP2K6|BATF3|TBP|CDKN2A|EIF2AK3|NFATC3|NFATC1|FOS|NFATC4|VEGFA|FGR|FOSL1|MAF|DDIT3|IRF1|ATF3|NOX1|ATF4|NFE2L2|TAF1
10035	0.042814	0.82691	8	238	response to inorganic substance	ATF1|FOSL1|MAPK9|MAPK8|EPO|DDIT3|FOS|PTGS2
2544	0.15575	0.98964	3	7	chronic inflammatory response	IL1B|CCL5|TNF
[truncated: 7 more columns]

## Sheet: Supplementary table (S4)
Selected ontology file : bundle://134.0:1/data/GO_Biological_Process
Selected annotation file : bundle://134.0:1/data/H_sapiens_default
Discarded evidence codes :
Overrepresentation
Selected statistical test : Hypergeometric test
Selected correction : Benjamini & Hochberg False Discovery Rate (FDR) correction
Selected significance level : 0.05
Testing option : Use whole annotation as reference set
The selected cluster :
NFE2	MAFG	MAFF	NFE2L3	MAFK	NFE2L1
No annotations were retrieved for the following entities:
GO-ID	p-value	corr p-value	x	n	Description	Genes in test set
6355	0.00063672	0.055237	8	1806	regulation of transcription, DNA-dependent	NFE2|MAFG|MAFF|NFE2L3|MAFK|BACH1|BACH2|NFE2L1
51252	0.0007891	0.055237	8	1855	regulation of RNA metabolic process	NFE2|MAFG|MAFF|NFE2L3|MAFK|BACH1|BACH2|NFE2L1
45449	0.01259	0.58755	8	2621	regulation of transcription	NFE2|MAFG|MAFF|NFE2L3|MAFK|BACH1|BACH2|NFE2L1
10556	0.026487	0.64922	8	2876	regulation of macromolecule biosynthetic process	NFE2|MAFG|MAFF|NFE2L3|MAFK|BACH1|BACH2|NFE2L1
10468	0.030491	0.64922	8	2927	regulation of gene expression	NFE2|MAFG|MAFF|NFE2L3|MAFK|BACH1|BACH2|NFE2L1
19219	0.03845	0.64922	8	3013	regulation of nucleobase, nucleoside, nucleotide and nucleic acid metabolic process	NFE2|MAFG|MAFF|NFE2L3|MAFK|BACH1|BACH2|NFE2L1
31326	0.039172	0.64922	8	3020	regulation of cellular biosynthetic process	NFE2|MAFG|MAFF|NFE2L3|MAFK|BACH1|BACH2|NFE2L1
51171	0.04119	0.64922	8	3039	regulation of nitrogen compound metabolic process	NFE2|MAFG|MAFF|NFE2L3|MAFK|BACH1|BACH2|NFE2L1
9889	0.041736	0.64922	8	3044	regulation of biosynthetic process	NFE2|MAFG|MAFF|NFE2L3|MAFK|BACH1|BACH2|NFE2L1
60255	0.095623	1.3387	8	3376	regulation of macromolecule metabolic process	NFE2|MAFG|MAFF|NFE2L3|MAFK|BACH1|BACH2|NFE2L1
80090	0.14397	1.8324	8	3553	regulation of primary metabolic process	NFE2|MAFG|MAFF|NFE2L3|MAFK|BACH1|BACH2|NFE2L1
31323	0.21479	2.5059	8	3735	regulation of cellular metabolic process	NFE2|MAFG|MAFF|NFE2L3|MAFK|BACH1|BACH2|NFE2L1
45604	0.28632	3.0835	2	15	regulation of epidermal cell differentiation	MAFG|MAFF
19222	0.31503	3.1503	8	3918	regulation of metabolic process	NFE2|MAFG|MAFF|NFE2L3|MAFK|BACH1|BACH2|NFE2L1
45682	0.62867	5.8676	2	22	regulation of epidermis development	MAFG|MAFF

## Sheet: Supplementary table (S5)
Selected ontology file : bundle://134.0:1/data/GO_Biological_Process
Selected annotation file : bundle://134.0:1/data/H_sapiens_default
Discarded evidence codes :
Overrepresentation
Selected statistical test : Hypergeometric test
Selected correction : Benjamini & Hochberg False Discovery Rate (FDR) correction
Selected significance level : 0.05
Testing option : Use whole annotation as reference set
The selected cluster :
CREBZF	GADD45GIP1	XBP1	CEBPG	EIF2AK3	CREB3L3	DDIT3	MAFG	ENC1	MAFF	MAFK	CD36	ATF6	SQSTM1	ATF4	NFE2L2
No annotations were retrieved for the following entities:
GO-ID	p-value	corr p-value	x	n	Description	Genes in test set
6986	1.3581e-06	0.00061116	6	66	response to unfolded protein	CREB3L3|DDIT3|EIF2AK3|CREBL1|ATF6|NFE2L2
34976	4.6738e-06	0.0010516	5	34	response to endoplasmic reticulum stress	DDIT3|EIF2AK3|ATF6|ATF4|NFE2L2
51789	4.5059e-05	0.0067589	6	117	response to protein stimulus	CREB3L3|DDIT3|EIF2AK3|CREBL1|ATF6|NFE2L2
6355	9.2564e-05	0.0077693	13	1807	regulation of transcription, DNA-dependent	CREBZF|XBP1|CEBPG|CREBL1|CREB3L3|DDIT3|MAFG|MAFF|MAFK|ATF6|SQSTM1|ATF4|NFE2L2
51252	0.00012888	0.0082851	13	1856	regulation of RNA metabolic process	CREBZF|XBP1|CEBPG|CREBL1|CREB3L3|DDIT3|MAFG|MAFF|MAFK|ATF6|SQSTM1|ATF4|NFE2L2
71445	0.00030234	0.017006	4	27	cellular response to protein stimulus	DDIT3|EIF2AK3|ATF6|NFE2L2
6984	0.0010076	0.050382	4	36	ER-nucleus signaling pathway	DDIT3|EIF2AK3|ATF6|NFE2L2
10556	0.0023102	0.10396	14	2877	regulation of macromolecule biosynthetic process	CREBZF|XBP1|CEBPG|EIF2AK3|CREBL1|CREB3L3|DDIT3|MAFG|MAFF|MAFK|ATF6|SQSTM1|ATF4|NFE2L2
10468	0.0029082	0.11897	14	2928	regulation of gene expression	CREBZF|XBP1|CEBPG|EIF2AK3|CREBL1|CREB3L3|DDIT3|MAFG|MAFF|MAFK|ATF6|SQSTM1|ATF4|NFE2L2
71216	0.0035876	0.13454	4	49	cellular response to biotic stimulus	DDIT3|EIF2AK3|ATF6|NFE2L2
31326	0.0043765	0.15149	14	3021	regulation of cellular biosynthetic process	CREBZF|XBP1|CEBPG|EIF2AK3|CREBL1|CREB3L3|DDIT3|MAFG|MAFF|MAFK|ATF6|SQSTM1|ATF4|NFE2L2
9889	0.0048525	0.15597	14	3045	regulation of biosynthetic process	CREBZF|XBP1|CEBPG|EIF2AK3|CREBL1|CREB3L3|DDIT3|MAFG|MAFF|MAFK|ATF6|SQSTM1|ATF4|NFE2L2
9607	0.0065506	0.19652	7	447	response to biotic stimulus	CREBZF|CREB3L3|DDIT3|EIF2AK3|CREBL1|ATF6|NFE2L2
45604	0.0075386	0.21202	3	15	regulation of epidermal cell differentiation	MAFG|MAFF|KEAP1
45449	0.0087175	0.23076	13	2622	regulation of transcription	CREBZF|XBP1|CEBPG|CREBL1|CREB3L3|DDIT3|MAFG|MAFF|MAFK|ATF6|SQSTM1|ATF4|NFE2L2
6950	0.014207	0.35519	11	1773	response to stress	CREB3L3|DDIT3|CEBPG|MAFF|EIF2AK3|CREBL1|CD36|ATF6|SQSTM1|ATF4|NFE2L2
60255	0.018581	0.44007	14	3377	regulation of macromolecule metabolic process	CREBZF|XBP1|CEBPG|EIF2AK3|CREBL1|CREB3L3|DDIT3|MAFG|MAFF|MAFK|ATF6|SQSTM1|ATF4|NFE2L2
45682	0.025375	0.57094	3	22	regulation of epidermis development	MAFG|MAFF|KEAP1
80090	0.035848	0.76817	14	3554	regulation of primary metabolic process	CREBZF|XBP1|CEBPG|EIF2AK3|CREBL1|CREB3L3|DDIT3|MAFG|MAFF|MAFK|ATF6|SQSTM1|ATF4|NFE2L2
19219	0.045863	0.92946	13	3014	regulation of nucleobase, nucleoside, nucleotide and nucleic acid metabolic process	CREBZF|XBP1|CEBPG|CREBL1|CREB3L3|DDIT3|MAFG|MAFF|MAFK|ATF6|SQSTM1|ATF4|NFE2L2
50896	0.047506	0.92946	14	3633	response to stimulus	CREBZF|XBP1|CEBPG|EIF2AK3|CREBL1|CREB3L3|DDIT3|MAFG|MAFF|CD36|ATF6|SQSTM1|ATF4|NFE2L2
51171	0.05076	0.95176	13	3040	regulation of nitrogen compound metabolic process	CREBZF|XBP1|CEBPG|CREBL1|CREB3L3|DDIT3|MAFG|MAFF|MAFK|ATF6|SQSTM1|ATF4|NFE2L2
